# Supplementary material for: Inhibition of astrocyte signaling leads to sex-specific changes in microglia phenotypes in a diet-based model of small cerebral vessel disease
Source: Research Square preprint supplement (doi:10.21203/rs.3.rs-6198453/v1), 2025-03-17
Supplement: Supplementary file 1 [file b1612e27cd018c7c9d0081a8.xlsx]

## Sheet: Supplementary Table 1
Supplementary Table 1. List of DEGs up and down regulated by HHcy (Hhcy_egfp vs CT_egfp) for females (Figure 3A)
HHcy Up			HHcy down
Gene	logFC	FDR	Gene	logFC	FDR
Rbm3	0.777328	2.04664e-178	Cx3cr1	-0.325297	4.50034e-109
Uba52	0.633789	5.30189e-149	Fcrls	-0.7667	9.27552e-96
Ifi27l2a	0.854884	8.15145e-131	Kctd12	-0.562772	9.23675e-94
Lgals3bp	0.670976	2.23048e-112	Ddx5	-0.33302	2.94401e-89
Rplp0	0.455707	3.53514e-107	Selenop	-0.435741	9.78937e-83
H2-D1	0.475959	5.17393e-100	Gpr34	-0.493283	1.51104e-78
Cd52	0.646466	3.54641e-91	Cst3	-0.391941	2.11524e-74
Npc2	0.451416	5.03491e-90	Malat1	-0.247791	3.72637e-65
H2-K1	0.445927	1.63189e-83	P2ry12	-0.374202	1.74987e-63
B2m	0.383817	7.97943e-81	Zfp36l1	-0.452945	2.32384e-55
Nfe2l2	0.446591	1.26936e-76	Csf1r	-0.223679	2.98646e-53
Tent5c	0.515801	9.80272e-74	Agmo	-0.421501	1.39315e-50
Psap	0.388851	1.24e-71	Cfh	-0.394527	9.13254e-50
Eef1a1	0.342303	1.473e-69	Calm2	-0.283611	4.37204e-49
Lgmn	0.243287	2.69591e-68	Spacdr	-0.335603	3.35071e-48
Selenow	0.564632	4.50223e-68	Rnf19b	-0.40353	3.58761e-45
Ly6e	0.349077	1.46534e-63	Egr1	-0.430292	4.74931e-44
H2-Q7	0.428985	7.17441e-63	Wdfy2	-0.432385	6.0525e-41
C1qa	0.312632	5.38624e-61	Btg2	-0.324966	1.77134e-40
Rack1	0.347774	2.10351e-59	Ppp1r10	-0.492565	2.55947e-40
Fth1	0.379009	7.34652e-59	Jund	-0.336051	6.7692e-39
Ctsb	0.376433	1.64854e-58	Ier2	-0.443454	3.75264e-38
Pvt1	0.447643	3.83041e-58	Jun	-0.424108	4.56282e-38
Gapdh	0.408668	1.27403e-57	Nav3	-0.378389	1.64595e-37
Rassf3	0.508285	2.29205e-57	H3f3b	-0.310609	1.67676e-37
Ssr4	0.379028	1.21987e-56	Siglech	-0.294963	9.42142e-37
Nme2	0.412752	8.83844e-55	Tm6sf1	-0.377877	2.94168e-36
C1qc	0.234228	1.2814e-52	Chd4	-0.379888	2.94037e-35
Psmb8	0.392676	1.86628e-51	Mef2a	-0.222258	4.25098e-35
Npm1	0.372715	2.72142e-51	Nckap1l	-0.300823	1.76436e-34
Lrmda	0.331092	3.70864e-50	Zfp36	-0.300871	1.25062e-33
Bst2	0.463551	4.90368e-50	Tuba1a	-0.528444	3.79336e-33
Psme2	0.475507	1.20754e-49	Ier5	-0.2948	8.26712e-33
H2-T23	0.364329	1.51827e-49	Dusp6	-0.433502	3.22321e-32
Eif3f	0.373148	2.62293e-49	Tpm3	-0.224114	4.53626e-32
Naca	0.323632	3.81008e-49	Chd9	-0.244027	1.98522e-31
Atp5g2	0.347908	6.17165e-49	Tmcc3	-0.249075	2.51349e-31
Ctss	0.242177	3.7161e-48	Gpr84	-0.490167	3.48624e-31
Cxcl16	0.549649	6.49147e-46	Maf	-0.313794	7.42163e-31
Psme1	0.383699	1.19207e-45	Zswim6	-0.287101	1.09772e-30
Itm2b	0.235353	1.159e-44	Hpgd	-0.436542	4.65281e-30
Grn	0.285035	1.10289e-43	Junb	-0.286524	1.16027e-29
Pik3ap1	0.353315	1.85526e-43	Mctp1	-0.355887	4.54837e-29
Ifitm3	0.538658	1.92109e-43	P2ry13	-0.307253	4.6025e-29
C1qb	0.225418	3.02893e-43	Hpgds	-0.217393	5.76762e-29
Prdx5	0.408497	6.02004e-43	Tle4	-0.341142	1.29709e-28
Bri3	0.293254	1.1421e-42	Ptpro	-0.409829	3.46486e-28
Daglb	0.336445	2.07488e-42	Inpp4b	-0.270634	2.14552e-27
Ly86	0.293319	4.61987e-42	Rhob	-0.276064	3.05459e-27
Pomp	0.340852	1.47782e-41	Cited2	-0.495749	8.60224e-27
Snx24	0.34712	2.66734e-41	Slc2a5	-0.386569	1.19865e-26
Timp2	0.358801	6.02526e-41	Mafb	-0.28212	1.92955e-26
H2-T22	0.478778	7.04427e-41	Adrb2	-0.391585	8.12724e-26
Sipa1l2	0.359656	7.87176e-41	Abca9	-0.327134	2.59008e-25
Lamp1	0.26971	3.86695e-40	Pou2f2	-0.223052	1.67729e-24
Gcnt2	0.481461	3.86695e-40	Selplg	-0.204733	1.67759e-24
Aif1	0.293018	1.16575e-39	Srsf5	-0.252268	4.45722e-24
Gns	0.284763	1.87262e-39	Eif4g2	-0.278067	1.64547e-23
Rtcb	0.463041	2.11291e-39	Ddx3x	-0.28965	2.09165e-23
Litaf	0.305532	4.51503e-39	Mir99ahg	-0.235199	2.56182e-23
Cox4i1	0.270234	5.91505e-39	Rock2	-0.240993	3.54589e-23
Traf3	0.422747	1.76724e-38	Srgap2	-0.214577	4.47364e-23
Ctsz	0.273916	6.20452e-38	Mid1ip1	-0.409595	7.56126e-23
Gna13	0.34754	6.71163e-37	Rapgef5	-0.250218	1.96685e-22
Fnip2	0.39194	1.07946e-36	Nfkbiz	-0.332018	2.60658e-22
Eef1b2	0.281468	3.35437e-36	Itgam	-0.205759	2.97768e-22
Apobec1	0.443983	3.46753e-36	Zfp710	-0.268474	7.217e-22
Tspo	0.434398	6.80332e-36	Mbnl1	-0.21213	9.23131e-22
H2-DMa	0.329221	1.01208e-35	Ifi27	-0.342502	1.15053e-21
Btf3	0.289661	2.39741e-35	C5ar1	-0.34351	2.59942e-21
Slc25a3	0.298204	2.42041e-35	Nav2	-0.222808	4.4077e-21
Ttr	0.347173	7.94486e-35	Ckb	-0.231722	9.64275e-21
Cd9	0.239427	9.68137e-35	Casp4	-0.279155	1.55321e-20
Igkc	0.541825	2.82096e-34	Tra2b	-0.232949	2.21348e-20
Lap3	0.377294	4.63327e-34	Fchsd2	-0.247858	1.15117e-19
Got1	0.495188	5.15176e-34	Nfam1	-0.342779	3.08835e-19
Slc3a2	0.317674	9.54397e-34	Lysmd4	-0.332676	8.00953e-19
Eif3k	0.351227	1.76752e-33	Numb	-0.231249	8.26426e-19
Usp12	0.423099	2.70216e-33	Gripap1	-0.332863	2.49181e-18
Hspe1	0.332131	6.24055e-33	Rnase4	-0.223442	3.04287e-18
Pycard	0.293694	9.00865e-33	D17H6S56E-5	-0.573029	3.93527e-18
Cyba	0.264869	1.60766e-32	Oxr1	-0.277619	5.86254e-18
Ppfia4	0.295673	3.80925e-32	Ivns1abp	-0.225373	6.19454e-18
Zfas1	0.419043	1.13006e-31	Tgfb1	-0.245637	6.19454e-18
Tex2	0.613898	2.37411e-31	Gabpb1	-0.362716	6.65705e-18
Cox5a	0.364227	4.92061e-31	Parp8	-0.268722	2.33986e-17
Ubl3	0.290672	1.13158e-30	Camk2n1	-0.278238	4.285e-17
Rgs1	0.552328	1.17382e-30	Tmx4	-0.378138	6.00634e-17
Dgkz	0.387567	1.3798e-30	Plxna4	-0.272128	7.09077e-17
Mef2d	0.33341	2.09014e-30	Pcf11	-0.293612	1.42737e-16
Gas5	0.28359	2.41951e-30	Scoc	-0.206722	2.53497e-16
Ifi30	0.359259	2.71261e-30	Myadm	-0.376604	3.60718e-16
Pkm	0.402115	2.76419e-30	Arap3	-0.399082	3.61746e-16
Tpd52	0.355743	7.20305e-30	Tgm2	-0.317741	3.71008e-16
Plekhm2	0.312579	8.38796e-29	Cebpd	-0.398577	5.26768e-16
Irf7	0.613527	1.08145e-28	Maml3	-0.203607	7.12861e-16
Scpep1	0.329433	1.2579e-28	Fosb	-0.256741	7.51104e-16
Ybx1	0.294306	2.00292e-28	Lrba	-0.315804	7.65586e-16
Atp6v1a	0.301504	3.59696e-28	Cmtm6	-0.225137	8.01977e-16
Ppard	0.32388	5.17293e-28	Tmem135	-0.205749	5.19113e-15
Akr1a1	0.28263	5.3363e-28	Tfe3	-0.267046	5.43753e-15
Etv6	0.260303	7.27391e-28	Chst8	-0.496776	5.90376e-15
Eif3e	0.317781	1.5739e-27	Il6ra	-0.20734	8.26882e-15
AW112010	0.469776	5.32941e-27	Sipa1	-0.238241	1.58571e-14
Coq10b	0.324707	5.68693e-27	Jak1	-0.218716	2.43575e-14
Mif	0.424075	5.87518e-27	Cryl1	-0.280265	3.01592e-14
Eef2	0.240267	6.71798e-27	Nufip2	-0.240504	5.59039e-14
Gbp7	0.430603	8.67362e-27	Itga6	-0.251855	7.20783e-14
Rtraf	0.318473	4.05619e-26	Tm9sf3	-0.207523	1.4161e-13
Ftl1	0.222508	4.92223e-26	Stab1	-0.314219	1.64379e-13
Sec14l1	0.3286	6.62017e-26	Slmap	-0.232203	3.12865e-13
Ndufb9	0.315245	1.32605e-25	Tal1	-0.345589	3.37598e-13
Atp5c1	0.293164	3.05436e-25	Zfp652	-0.212423	4.29768e-13
Atp6v1c1	0.292657	3.88721e-25	Elk3	-0.213256	7.32205e-13
Shisa5	0.32837	1.13266e-24	Stag2	-0.219288	7.74372e-13
Arpc3	0.230813	1.62761e-24	Fos	-0.203973	8.77282e-13
Npnt	0.480502	1.62761e-24	Ier3	-0.266639	1.81259e-12
Ctsh	0.202532	1.67759e-24	Mlxip	-0.213461	2.79597e-12
Cebpb	0.268686	1.67759e-24	Nfkbia	-0.254249	2.83931e-12
Cstb	0.424599	1.96884e-24	Prkce	-0.261155	3.24576e-12
Ldha	0.352165	2.1628e-24	Ulk2	-0.226997	3.6919e-12
Tns3	0.247791	3.17854e-24	Sptlc2	-0.220838	5.87003e-12
Atp6v0c	0.221793	4.0482e-24	Cep68	-0.312412	6.25694e-12
Psmb9	0.296318	4.36141e-24	Fat3	-0.261615	6.90837e-12
Rilpl2	0.369375	6.05579e-24	Hdac1	-0.259199	6.90837e-12
Gpi1	0.342665	9.86893e-24	Exoc6b	-0.21944	7.19265e-12
Cadm1	0.2739	1.27647e-23	Dnajb1	-0.367286	7.66045e-12
Epsti1	0.281745	1.39495e-23	Nckap5l	-0.269251	8.41019e-12
Eif3h	0.268935	1.80312e-23	Nbea	-0.294249	8.43325e-12
Ifngr2	0.244888	1.98911e-23	Ube2e3	-0.272822	1.09326e-11
Optn	0.394461	2.03083e-23	Arhgap22	-0.202285	1.43573e-11
Max	0.383596	2.12916e-23	Ecscr	-0.232759	2.82321e-11
Cst7	0.544687	2.17697e-23	Liph	-0.295688	2.9017e-11
Rsrp1	0.241486	2.8211e-23	Far1	-0.254753	3.33676e-11
Rasa4	0.323505	6.63723e-23	Rin3	-0.279329	3.57776e-11
Sdcbp	0.229842	6.93196e-23	Dnajb4	-0.309833	3.73051e-11
Acss1	0.364722	6.99178e-23	Rtn1	-0.22967	4.05891e-11
Spint1	0.34166	9.07062e-23	Sft2d2	-0.281269	4.22954e-11
Cd86	0.287415	9.70597e-23	Creb5	-0.234118	4.33784e-11
Trim30a	0.292064	1.06062e-22	H1f2	-0.303296	6.4388e-11
Tbca	0.29064	1.14434e-22	Itga5	-0.336451	9.63904e-11
Clic4	0.378998	1.53275e-22	Rhobtb1	-0.219875	1.93483e-10
Pfdn5	0.217385	1.79227e-22	Itgav	-0.206885	2.02766e-10
Ccny	0.362878	2.57194e-22	Cbx4	-0.261245	2.49119e-10
Cd63	0.326539	2.75128e-22	Pik3cd	-0.210376	3.56332e-10
Sdf4	0.263218	5.89815e-22	Bmpr2	-0.203695	4.55453e-10
Trim25	0.451613	6.18042e-22	Map7d1	-0.253014	5.63059e-10
Rffl	0.25908	6.93469e-22	Chsy1	-0.277392	6.0933e-10
B4galt5	0.411801	8.30304e-22	Fgd3	-0.227585	6.16966e-10
Lgals9	0.251509	8.51213e-22	Ets1	-0.289137	7.71287e-10
Atp8a1	0.233273	9.23673e-22	Prpf4b	-0.216748	8.00158e-10
Tomm20	0.274829	1.06562e-21	Ints6	-0.316953	1.00389e-09
Slc25a5	0.224635	1.32463e-21	Marcksl1	-0.282051	1.34751e-09
Tbc1d8	0.368288	1.39219e-21	Tbpl1	-0.243401	1.34985e-09
Arpc1b	0.203715	1.40908e-21	Il17ra	-0.227191	1.38744e-09
Eif3i	0.34895	1.41216e-21	Slbp	-0.245097	1.6142e-09
Lrpap1	0.333382	1.61861e-21	Trim8	-0.200207	1.65837e-09
Lrrfip1	0.260372	2.97758e-21	Vis1	-0.227682	2.31382e-09
Ly6a	0.422733	5.61901e-21	Erf	-0.236315	2.54665e-09
Dennd2b	0.386941	6.14391e-21	Gcnt1	-0.210844	2.87657e-09
Tbc1d10a	0.332288	7.30069e-21	Col27a1	-0.210711	3.56047e-09
Gng12	0.307935	8.19443e-21	Klk8	-0.225199	3.61087e-09
Hscb	0.438099	1.19341e-20	Opa3	-0.266303	3.95564e-09
Atp6v1f	0.258202	1.53008e-20	Pde4d	-0.273983	4.35427e-09
Gabarap	0.214636	1.69599e-20	Med12l	-0.235408	5.4625e-09
Snx20	0.260538	2.35575e-20	Abcc3	-0.258357	6.76071e-09
Rere	0.234209	2.35575e-20	Oga	-0.212298	7.0459e-09
Cyth1	0.41289	2.998e-20	Cxcl9	-0.485137	7.06149e-09
Eef1g	0.271792	3.62204e-20	Bcl10	-0.206487	8.82247e-09
C1qbp	0.356376	3.864e-20	Creb1	-0.209266	1.09578e-08
Tra2a	0.221478	4.43927e-20	Rcan1	-0.393438	1.30718e-08
Ms4a6c	0.429883	4.51114e-20	Nfya	-0.218979	1.39647e-08
Psmb1	0.269608	4.78127e-20	Icam1	-0.215755	1.43034e-08
Gfpt1	0.377682	6.12207e-20	Ralgps2	-0.245754	1.43163e-08
Pold4	0.274104	6.59792e-20	Nos1ap	-0.265143	1.43163e-08
Ppib	0.222198	6.60099e-20	Taf7	-0.256582	1.57853e-08
Aplp2	0.365938	7.73718e-20	Mboat7	-0.268498	2.05522e-08
Rilpl1	0.323221	1.05453e-19	Fscn1	-0.213877	2.103e-08
Atp5d	0.270685	1.30824e-19	Trim47	-0.270657	2.91665e-08
Hint1	0.250777	1.41519e-19	Notch1	-0.251339	3.5997e-08
Myo5a	0.428838	1.44567e-19	Neat1	-0.201587	4.09165e-08
Tmsb10	0.299416	1.77869e-19	Ripor2	-0.264836	7.57193e-08
Eif3m	0.306297	2.67181e-19	Pard3b	-0.211177	7.61248e-08
Zbp1	0.42275	3.2424e-19	Stambpl1	-0.210942	7.67091e-08
Cox8a	0.209108	4.23948e-19	Rnf167	-0.21915	1.15408e-07
Cirbp	0.35037	4.62173e-19	Sp4	-0.222034	1.52087e-07
Atp5b	0.243826	6.07626e-19	Tlr4	-0.25695	1.6235e-07
Clec7a	0.492	7.26225e-19	Map2k3	-0.24293	1.63384e-07
Napa	0.322966	7.59592e-19	Pdlim5	-0.202199	3.20715e-07
Pgam1	0.321865	7.924e-19	Dpm3	-0.204711	4.50902e-07
Znfx1	0.318219	8.34909e-19	Sin3a	-0.223818	4.75608e-07
Axl	0.315001	9.2308e-19	Tsen34	-0.212825	6.61776e-07
Lhfpl2	0.248283	1.05296e-18	Filip1l	-0.206233	8.9627e-07
Vdac2	0.214999	1.09063e-18	Mob3a	-0.217766	1.25423e-06
Echs1	0.38048	1.12995e-18	Mknk2	-0.221677	1.60461e-06
Ubxn1	0.283463	1.12995e-18	Kcnq1ot1	-0.221722	1.71571e-06
Rab11a	0.239006	1.25203e-18	Bin3	-0.228303	4.91377e-06
Psmb10	0.297218	1.60513e-18	Kdm5b	-0.240633	4.96135e-06
Uqcrfs1	0.330392	1.95588e-18	Hipk3	-0.202025	7.74866e-06
Snhg12	0.320365	2.12797e-18	Mast4	-0.20812	9.97176e-06
Dtnbp1	0.268401	2.44879e-18	Zfp950	-0.200739	1.34233e-05
Camk2d	0.202051	2.71369e-18	Slc40a1	-0.210402	1.36481e-05
Pitpnc1	0.249951	3.8307e-18	Egr3	-0.213163	1.4484e-05
Nt5dc3	0.391994	3.88638e-18	Errfi1	-0.251775	2.83911e-05
Xaf1	0.369263	3.98475e-18	Stard8	-0.206643	3.35855e-05
Lat2	0.287589	4.32219e-18	Dhx40	-0.257224	0.000157336
Hps4	0.241887	4.45292e-18	Ccl2	-0.207857	0.00357057
P2rx4	0.295065	4.53174e-18	Iigp1	-0.205255	0.00586216
Lag3	0.209867	4.56335e-18
Igbp1	0.314553	5.2002e-18
Pgk1	0.376828	6.79696e-18
Samd8	0.314809	7.07162e-18
Cd300a	0.273293	7.51573e-18
Tpi1	0.373787	9.10043e-18
Ccni	0.229153	1.40783e-17
Entpd1	0.226786	1.42903e-17
Bcl2a1d	0.408917	1.68259e-17
Phf11b	0.412646	1.7419e-17
Smad3	0.252644	3.78889e-17
Tap1	0.290875	3.94767e-17
Psmb2	0.255889	3.94767e-17
Hif1a	0.267262	4.96233e-17
Cmklr1	0.342048	6.87789e-17
Ccdc86	0.342342	7.10015e-17
Nceh1	0.461171	7.41247e-17
Nampt	0.314597	8.42171e-17
Smad7	0.220205	9.67885e-17
Tmed3	0.282612	1.02586e-16
Crlf2	0.287774	1.08412e-16
Fmnl2	0.307163	1.18127e-16
Havcr2	0.241727	1.54753e-16
Parp12	0.359677	1.99271e-16
Use1	0.277435	2.37866e-16
Fgd2	0.202483	2.4868e-16
Fundc2	0.386113	3.11516e-16
Ogfr	0.339972	3.18801e-16
Parp9	0.300414	3.32848e-16
Eno1	0.318023	3.3482e-16
Bag1	0.254941	3.86222e-16
Slamf9	0.324114	4.5143e-16
Pgls	0.266074	5.30344e-16
Slc11a1	0.255504	6.26274e-16
Snx2	0.241563	7.25786e-16
Rfc2	0.342491	8.36779e-16
Gnptab	0.388542	8.48464e-16
Sec61b	0.238238	1.03755e-15
Naglu	0.312327	1.4339e-15
Rbm47	0.23177	1.44429e-15
Ube2j1	0.25947	1.50841e-15
Marchf5	0.285746	1.62597e-15
Cycs	0.303497	1.78902e-15
Atp5g1	0.258103	2.08915e-15
Zc3h12a	0.324786	2.42003e-15
Lrrc8d	0.223618	3.19095e-15
Rbfox1	0.437441	3.29215e-15
Vamp8	0.203225	3.29215e-15
Polr1d	0.239459	3.35117e-15
Slc6a6	0.235461	4.07898e-15
Dnajb14	0.307162	6.14079e-15
Psma7	0.239174	6.46892e-15
Slc25a4	0.241716	7.25936e-15
Cry1	0.353485	7.74436e-15
Ddhd1	0.468325	8.11797e-15
Ergic3	0.24238	8.23081e-15
Abr	0.245569	8.62256e-15
Ndufb5	0.261253	9.27263e-15
Mpp7	0.304032	9.43062e-15
Plekha1	0.285018	1.05157e-14
ENSMUSG00000121485	0.323029	1.05412e-14
Arfgef2	0.307289	1.05442e-14
Myo1e	0.364026	1.31787e-14
Eif2ak2	0.302374	1.34081e-14
Colgalt1	0.27847	1.49556e-14
Amz1	0.280636	1.60936e-14
Fis1	0.244116	1.76711e-14
Cd274	0.347002	2.02645e-14
Anxa5	0.363017	2.16172e-14
Mrpl30	0.30325	2.31948e-14
Gusb	0.239709	2.62403e-14
Rap2a	0.304592	2.72485e-14
Zcchc14	0.359927	4.88799e-14
Ube2i	0.215885	4.92723e-14
Tkt	0.261475	6.03117e-14
Gpcpd1	0.224174	6.16981e-14
Oasl2	0.357567	6.37028e-14
Anp32b	0.262024	6.56772e-14
Ric1	0.324843	7.62325e-14
Zdhhc14	0.245571	9.02039e-14
Ndufs3	0.265821	1.02796e-13
Cryba4	0.276878	1.33051e-13
Tnfsf13b	0.31716	1.43798e-13
Rabgef1	0.23767	1.63724e-13
Spg21	0.283623	2.00326e-13
Pip5k1c	0.296346	3.43478e-13
Slc31a2	0.336646	3.45728e-13
Psmb6	0.255033	4.05392e-13
Hnrnpll	0.350787	4.29768e-13
Tns1	0.272552	4.67429e-13
Mat2a	0.203615	5.8657e-13
Apbb2	0.230415	6.10429e-13
Aprt	0.29427	7.09509e-13
Plaur	0.291157	8.98415e-13
Cd48	0.24629	9.31136e-13
Timm10b	0.23555	9.80038e-13
Rtp4	0.295521	1.40639e-12
Kxd1	0.286948	1.43348e-12
Elovl5	0.367537	1.43502e-12
Hyi	0.330331	1.43502e-12
Stat2	0.314593	1.44945e-12
Isg15	0.408611	1.45328e-12
Ankrd13a	0.247212	1.46471e-12
Rufy3	0.263331	1.55234e-12
Smdt1	0.224829	1.58851e-12
P4ha1	0.251241	1.6936e-12
Pebp1	0.223156	1.86719e-12
Mapk6	0.253396	2.07842e-12
Tor3a	0.287848	2.78655e-12
Ddost	0.231787	3.62521e-12
Gde1	0.238205	3.6919e-12
Nubp1	0.313677	3.69914e-12
Ifnar1	0.289594	3.75556e-12
Peds1	0.286306	4.13668e-12
Phf11d	0.372693	4.33234e-12
Plbd2	0.265091	4.96065e-12
Kpna4	0.201053	5.14494e-12
Snrpd2	0.24923	5.72792e-12
Ranbp1	0.258355	6.18796e-12
Adar	0.307355	6.37939e-12
Stx16	0.247997	1.28398e-11
Hs2st1	0.244633	1.45787e-11
Med14	0.330762	1.53466e-11
Ndufb8	0.230678	1.63634e-11
Coa5	0.312671	1.67744e-11
Slc16a10	0.293864	1.97993e-11
Grina	0.206186	1.97993e-11
Rnf149	0.312436	2.17546e-11
Naa50	0.244153	2.18214e-11
Ubn1	0.209601	2.81781e-11
Sp140	0.261723	2.86884e-11
Atp5o	0.243411	3.19495e-11
Pld3	0.266987	3.29957e-11
Pfkl	0.301793	3.65724e-11
Plin2	0.378066	3.83986e-11
Atxn10	0.222541	4.25955e-11
Mideas	0.21543	4.75793e-11
Gatm	0.227283	5.21835e-11
Prelid1	0.265754	6.2046e-11
Bax	0.234797	6.84613e-11
Sdhb	0.220635	6.85733e-11
Slc37a2	0.278904	7.09425e-11
Mrpl54	0.299429	7.22622e-11
Slc7a1	0.33669	7.55284e-11
Sp100	0.240378	8.45151e-11
Dnaja2	0.20152	8.60008e-11
Txn2	0.278654	9.36346e-11
Tlr2	0.25287	9.68632e-11
Cox5b	0.202806	1.01767e-10
Camkk2	0.254011	1.02138e-10
Txn1	0.277641	1.06173e-10
Rragc	0.224362	1.11898e-10
Arid5b	0.245271	1.14658e-10
Gnl3	0.264463	1.30215e-10
Naaa	0.313632	1.37913e-10
Clcn7	0.306591	1.41577e-10
Mvb12a	0.28975	1.42561e-10
Gfer	0.280706	1.66395e-10
Snx30	0.209845	1.85171e-10
Arhgef7	0.296566	1.98106e-10
Bcl2a1a	0.257541	2.0928e-10
Apoe	0.348701	2.16353e-10
Serp1	0.200774	2.31565e-10
Csf2rb	0.253638	2.79819e-10
Ptpmt1	0.276228	4.00291e-10
Hspd1	0.236833	4.77512e-10
Gltp	0.227312	5.02808e-10
Glrx3	0.24565	5.30145e-10
Rnf213	0.256289	5.56993e-10
Ccrl2	0.221029	5.56993e-10
Cct4	0.211605	5.85485e-10
Calm3	0.246566	7.09022e-10
Cox7b	0.205734	7.6605e-10
Mfsd11	0.283885	8.00828e-10
Akr1b3	0.23016	8.42494e-10
Slc35b1	0.278334	8.55244e-10
Herc6	0.26189	1.02051e-09
Trappc2l	0.235202	1.16141e-09
Stat1	0.204873	1.16206e-09
Nenf	0.235515	1.22293e-09
Alas1	0.263811	1.31317e-09
Nme1	0.249346	1.31317e-09
Bhlhe41	0.204275	1.42906e-09
Micos13	0.204989	1.47175e-09
Epb41	0.206171	1.6142e-09
Fam219a	0.238859	1.6142e-09
Epb41l4aos	0.277813	1.7103e-09
Med28	0.226529	1.80957e-09
Trim34a	0.291155	1.84918e-09
Atp13a2	0.266623	1.96032e-09
Hebp1	0.217147	2.34564e-09
Vps33a	0.26351	2.45945e-09
Sin3b	0.206794	2.62774e-09
Dcxr	0.266191	3.55583e-09
Mrpl12	0.260139	3.82222e-09
Ripk2	0.22466	3.90084e-09
Dpm1	0.207097	3.92788e-09
Spsb1	0.246809	3.95564e-09
Sp110	0.21333	3.95564e-09
Dennd1b	0.203995	4.23764e-09
Slc38a6	0.298868	4.25079e-09
Orai2	0.215858	4.30991e-09
Lamtor3	0.242734	4.32486e-09
Plaat3	0.252396	4.57705e-09
Fam167b	0.245115	4.77734e-09
Mtch2	0.237641	6.47453e-09
Plekhj1	0.223648	6.58446e-09
Fbl	0.214295	7.27425e-09
Coro7	0.259178	7.53992e-09
Gpr160	0.260743	8.70919e-09
Oxa1l	0.260581	9.7391e-09
Osm	0.284271	9.87145e-09
Psma2	0.200894	9.98229e-09
Tor1aip2	0.202337	1.00398e-08
Ifi35	0.227812	1.17566e-08
Hspa9	0.2112	1.32193e-08
Vps29	0.203931	1.40578e-08
Aurkaip1	0.228851	1.42591e-08
Sdc3	0.249531	1.45452e-08
Nrbf2	0.205408	1.69416e-08
Tom1	0.21992	1.84891e-08
Etfa	0.225556	2.01906e-08
Tnfsf12	0.261365	2.11951e-08
Trpm2	0.207902	2.24842e-08
Slamf8	0.274675	2.27227e-08
Necap2	0.205598	2.45948e-08
Psma4	0.206012	2.47747e-08
Itgax	0.338478	2.64914e-08
Tmem134	0.22445	2.71064e-08
Zc3h12c	0.28075	2.79826e-08
Hk3	0.232013	2.96931e-08
Ddx60	0.296052	3.46603e-08
Cope	0.200227	3.51985e-08
Ilf3	0.213006	3.5997e-08
Dapk1	0.272683	3.70888e-08
Pcgf5	0.283374	3.77251e-08
Stmp1	0.251014	3.79338e-08
Hcfc1r1	0.224314	4.12838e-08
Hcar2	0.252181	4.91468e-08
Ciao2a	0.225009	5.08007e-08
Cep43	0.21458	5.1461e-08
Pcyt1a	0.22149	5.88565e-08
Tmem140	0.247924	6.02276e-08
Cops6	0.238344	6.0767e-08
Pafah1b3	0.257623	6.18562e-08
Mxd1	0.362935	6.25008e-08
Ncbp2as2	0.232933	6.36866e-08
Arl5b	0.218749	6.739e-08
Gbp8	0.294153	7.1368e-08
Mrpl42	0.223345	7.76834e-08
Gnl2	0.230345	7.78997e-08
Prr5l	0.284073	8.51924e-08
Ndufa12	0.215887	8.7648e-08
Csnk1g3	0.206198	1.0111e-07
Irgm1	0.2313	1.15e-07
Id2	0.200095	1.19779e-07
Nfu1	0.227628	1.20182e-07
Ak2	0.219985	1.36771e-07
Sgpp1	0.277473	1.3962e-07
Trim35	0.262751	1.45456e-07
Ndufv2	0.214956	1.4611e-07
Cd300lf	0.282361	1.53674e-07
Aco2	0.213474	1.57113e-07
Tbcb	0.200981	1.57655e-07
Malt1	0.279712	1.82612e-07
Gars	0.232331	1.86848e-07
Keap1	0.247768	1.99528e-07
Tmem106a	0.25977	2.00368e-07
Myo1g	0.26591	2.17136e-07
Dtx3l	0.22504	2.47433e-07
Zfyve26	0.252175	2.50035e-07
Erlec1	0.215255	2.6374e-07
Aph1a	0.208025	3.22807e-07
Snf8	0.200337	3.50364e-07
Trappc1	0.22917	3.50415e-07
Minpp1	0.235894	3.65131e-07
Dars	0.234052	3.89842e-07
Usp36	0.223038	4.80843e-07
Hint2	0.221474	4.88451e-07
Il18bp	0.275678	5.02633e-07
Anapc5	0.206245	5.41916e-07
Ifi213	0.312383	5.67348e-07
Slc38a1	0.201625	6.13278e-07
Svbp	0.206914	6.34916e-07
Tbc1d1	0.20178	6.7121e-07
Ddt	0.222154	7.83122e-07
Ccl5	0.357321	8.6065e-07
Igtp	0.238769	8.91198e-07
Sec24a	0.200477	8.95603e-07
Eif2a	0.2155	9.45445e-07
Nudt9	0.205386	1.03271e-06
Tiparp	0.214033	1.21665e-06
Mrps16	0.216718	1.25253e-06
Cd74	0.200329	1.32387e-06
Batf3	0.211452	1.40495e-06
Becn1	0.208	1.54216e-06
Inpp4a	0.200067	2.08823e-06
Nsd2	0.237295	2.69704e-06
Otud4	0.218781	3.48703e-06
Sf3a1	0.207861	3.62001e-06
Tiam1	0.20551	4.17068e-06
Smim29	0.202051	4.18441e-06
Abhd16a	0.200978	4.46233e-06
Mif4gd	0.220927	5.0022e-06
Cmc1	0.205588	5.38248e-06
Sod2	0.20162	5.85843e-06
Tpm4	0.222773	6.64928e-06
Tomm5	0.203483	7.19874e-06
Ipmk	0.25486	1.68487e-05
Adam9	0.201184	1.78125e-05
Marchf3	0.249098	4.61188e-05
Zfp64	0.2193	0.000115961
Fxyd5	0.209393	0.000505711
Ifi211	0.201971	0.000853856
Ifit2	0.20443	0.00942328

## Sheet: Supplementary Table 2
Supplementary Table 2. List of DEGs up and down regulated in control diet (CT_egfp vs CT_VIVIT) for females (from Figure 3C)
Vivit up			Vivit down
Gene	logFC	FDR	Gene	logFC	FDR
Igkc	0.668576	2.6961e-59	P2ry12	-0.722464	9.84879e-268
P4ha1	0.434476	4.24498e-41	Cx3cr1	-0.397463	5.25082e-190
Lgals3bp	0.379337	2.81161e-40	Mef2a	-0.464306	9.64499e-173
Ifi27l2a	0.399391	3.33051e-31	Siglech	-0.501947	5.91834e-120
Ucp2	0.241338	1.34629e-29	Gpr34	-0.539715	1.00367e-111
Ctsc	0.301713	1.27465e-26	Csf1r	-0.292414	3.35412e-104
Psap	0.208644	1.85176e-24	Hpgds	-0.39144	6.07591e-102
Bcl2a1d	0.465235	2.98237e-24	Ddx5	-0.311937	1.13905e-91
Hspa8	0.211779	3.01576e-24	Itgam	-0.394939	5.0793e-87
Npnt	0.453806	1.4731e-23	H3f3b	-0.416871	1.14225e-78
Dnaja1	0.312883	1.5726e-23	Fcrls	-0.607055	2.0497e-78
H2-K1	0.2061	2.75012e-21	Selenop	-0.383236	5.89456e-76
Ccnd3	0.248724	1.26008e-20	Selplg	-0.335566	1.35761e-74
Timp2	0.220881	3.54246e-18	Tmcc3	-0.35594	1.84696e-73
Dnajb1	0.383928	4.39026e-17	Hexb	-0.205675	1.47949e-70
Fkbp5	0.307228	1.86086e-16	Eeig2	-0.437075	5.68286e-70
Plaur	0.31132	8.57264e-16	Cfh	-0.436779	8.83148e-70
Rbpj	0.23653	1.08101e-15	Jun	-0.499855	5.07861e-63
Rassf3	0.247816	3.33891e-15	Tgm2	-0.610252	1.28848e-60
Cadm1	0.203666	3.85447e-15	Pmepa1	-0.325152	2.60358e-60
Myo1e	0.346791	8.72139e-15	Ifngr1	-0.333919	1.10994e-58
Ddhd1	0.443187	1.14778e-14	Nav3	-0.44366	1.1686e-58
Fmnl2	0.270387	1.24798e-14	Atf3	-0.402003	6.61599e-58
Rasgef1b	0.222067	5.56114e-14	Rhob	-0.372106	5.07932e-57
Il1b	0.358644	5.88567e-14	Ier5	-0.362858	6.10685e-57
Slc37a2	0.301351	7.32194e-14	Tanc2	-0.261344	3.81153e-56
Gatm	0.241078	1.22087e-13	Ckb	-0.360136	8.55178e-55
Ifih1	0.387546	1.86697e-13	Gng10	-0.334165	9.60774e-55
Ly6a	0.323	2.24242e-13	Apbb1ip	-0.322304	4.72535e-54
Egr2	0.301674	3.6866e-13	Serinc3	-0.205396	1.10618e-52
Nfat5	0.225591	4.8305e-13	Srgap2	-0.30273	1.4031e-52
Dapk1	0.327858	1.83321e-12	Tm6sf1	-0.426581	8.48955e-52
Apoe	0.357173	4.0741e-12	Tmx4	-0.63765	1.14822e-50
Cd52	0.21342	4.4129e-12	Plxdc2	-0.26692	1.32972e-50
Zdhhc14	0.210137	1.64269e-11	Tpt1	-0.25751	3.99241e-50
Irf7	0.372307	4.30958e-11	Rnase4	-0.358181	3.99241e-50
Itgax	0.375669	1.78772e-10	Cst3	-0.291768	5.12653e-50
Stip1	0.263571	2.32344e-10	Ttr	-0.420756	7.01601e-50
Zfp64	0.328915	3.16677e-10	Cmtm6	-0.392249	3.98057e-49
Pld3	0.239431	4.5333e-10	Rap1a	-0.318463	1.0596e-48
Tns1	0.217816	3.28614e-09	Chd9	-0.282416	7.69723e-48
Itpkb	0.224057	5.81029e-09	Sft2d1	-0.295422	3.85166e-45
Clic4	0.221609	6.70725e-09	Elmo1	-0.263669	6.08081e-45
Rcan1	0.328585	1.08036e-08	Son	-0.258643	6.13262e-45
Zc3h12c	0.27332	1.46996e-08	Commd8	-0.440418	9.18581e-45
Slamf9	0.222643	2.06577e-08	Mir99ahg	-0.302759	4.44436e-44
Parp12	0.238236	3.3873e-08	Sparc	-0.306526	6.02504e-44
Ifitm3	0.207393	1.37136e-07	H3f3a	-0.260937	5.18122e-43
Pim1	0.221114	4.9951e-07	Qki	-0.237334	6.20903e-43
Gbp7	0.200715	7.83834e-07	Cyfip1	-0.239471	1.15443e-42
Clec7a	0.259296	3.15202e-06	Cyth4	-0.281559	1.75268e-42
Phf11b	0.225719	3.57347e-06	Inpp4b	-0.312834	3.79466e-42
Isg15	0.256964	9.26299e-06	Mctp1	-0.397556	1.23156e-41
Rgs1	0.223257	9.99979e-06	Gnas	-0.31137	1.79505e-41
Ccl12	0.202536	1.08961e-05	Ecscr	-0.443174	4.24498e-41
Tmem106a	0.211549	1.26813e-05	Slc2a5	-0.451291	1.41614e-40
Vcam1	0.208379	1.79344e-05	Uqcrb	-0.420609	3.12368e-40
Carmil1	0.2345	3.44644e-05	P2ry13	-0.342146	5.78444e-40
Cd300lf	0.221846	3.73126e-05	Srsf5	-0.310476	1.00437e-39
Ccl2	0.261225	8.32325e-05	Lysmd4	-0.467997	2.71852e-39
Gbp8	0.204348	0.000165668	Ivns1abp	-0.318117	1.41302e-38
Marchf3	0.215375	0.000293953	Neurl3	-0.393757	7.57713e-38
Ifi213	0.225359	0.000425524	Susd3	-0.37353	3.40537e-37
			Scoc	-0.296156	4.71864e-36
			Bin1	-0.232521	1.20451e-35
			Mbnl1	-0.253067	2.20887e-35
			Tgfbr1	-0.286008	2.62811e-35
			Arhgap5	-0.25431	4.46295e-34
			Maml3	-0.279597	8.02451e-34
			Clic1	-0.213977	2.42722e-33
			Anxa3	-0.23913	2.66096e-33
			Sh3glb1	-0.214022	4.62068e-33
			Zfp36	-0.27467	4.79253e-33
			Calm2	-0.213158	1.14277e-32
			Zeb2os	-0.34037	5.38364e-32
			Ptpro	-0.405256	9.92455e-32
			Csmd3	-0.363137	1.88341e-31
			Rapgef5	-0.27577	2.23437e-31
			Macf1	-0.205832	5.45463e-31
			Rplp2	-0.221923	7.13955e-31
			Vsir	-0.223871	3.84993e-30
			Il21r	-0.334211	2.34289e-29
			Fli1	-0.227611	2.51278e-29
			Tln1	-0.253651	3.47612e-29
			Golm1	-0.271137	3.60403e-29
			Rap1gds1	-0.224718	7.23617e-29
			Slco2b1	-0.276121	1.18583e-28
			Agmo	-0.284697	1.20405e-28
			Junb	-0.257446	2.38341e-28
			Saraf	-0.248989	3.38751e-28
			Zeb1	-0.31488	8.24539e-28
			Hmgb1	-0.224867	8.68347e-28
			Serinc1	-0.308013	1.6332e-27
			Iffo1	-0.396185	3.62031e-27
			Rnf180	-0.268802	3.6685e-27
			Bin2	-0.240756	3.73343e-27
			Zfand5	-0.288888	6.25964e-27
			Tax1bp1	-0.281675	7.29508e-27
			Olfml3	-0.213099	7.31002e-27
			Fgd3	-0.375592	8.16656e-27
			Oxr1	-0.320494	8.80515e-27
			Chsy1	-0.453785	1.96446e-26
			Btg1	-0.211688	2.39406e-26
			Pde3b	-0.230685	3.23592e-26
			Txnip	-0.291826	3.61448e-26
			Wasf2	-0.207114	3.77422e-26
			Maf	-0.264227	8.19574e-26
			Arpc4	-0.240957	4.75078e-25
			Nav2	-0.224297	4.82379e-25
			Fos	-0.267662	5.63287e-25
			Jund	-0.245417	6.56931e-25
			Aim2	-0.237442	1.16815e-24
			Ogfrl1	-0.284402	1.1729e-24
			Clip1	-0.259372	1.65009e-24
			Ltc4s	-0.261312	3.46527e-24
			Cep170	-0.300484	3.67462e-24
			Il6st	-0.291093	5.9131e-24
			Ier2	-0.314738	7.75989e-24
			Rgs2	-0.287962	1.06712e-23
			Rtn4	-0.229378	1.1569e-23
			Eif4g2	-0.262652	1.36422e-23
			Phf14	-0.273172	2.86326e-23
			Slc15a3	-0.274587	5.4698e-23
			Rubcnl	-0.373643	5.84912e-23
			Stambpl1	-0.368903	5.96073e-23
			Egr1	-0.270346	9.72277e-23
			Nr3c1	-0.247865	1.84622e-22
			Dock10	-0.210013	2.02213e-22
			Kctd12	-0.244749	2.29988e-22
			Akap13	-0.210068	1.0455e-21
			Lrrc25	-0.35963	1.35566e-21
			Rhobtb1	-0.309427	1.90682e-21
			Btg2	-0.213651	2.83697e-21
			Sec11c	-0.28154	3.48987e-21
			Wdfy2	-0.279205	6.08139e-21
			Lrba	-0.343918	6.82435e-21
			Adgrg1	-0.272411	7.06424e-21
			Nptn	-0.225808	8.01435e-21
			Klf7	-0.316501	9.81651e-21
			Tbxas1	-0.231799	1.1644e-20
			Cops4	-0.299886	1.31873e-20
			Zfp652	-0.255365	1.65917e-20
			Socs3	-0.260792	1.72431e-20
			Xlr	-0.366818	1.93433e-20
			Bbs9	-0.296413	2.10705e-20
			Smarca5	-0.250527	2.3944e-20
			Tmem86a	-0.299139	3.77675e-20
			Tuba1a	-0.377739	5.29523e-20
			Pmp22	-0.280522	5.85163e-20
			Ndfip1	-0.21494	6.82861e-20
			Dleu2	-0.201899	9.42413e-20
			Trf	-0.203313	1.18808e-19
			Atp5mpl	-0.276365	1.7404e-19
			Dusp6	-0.306218	2.83875e-19
			Sec62	-0.216522	3.72198e-19
			Klf2	-0.404932	5.04904e-19
			Dgkd	-0.210995	5.47744e-19
			Hnrnpu	-0.204231	5.94223e-19
			Cmtm7	-0.206355	1.03321e-18
			Mafg	-0.278793	1.11603e-18
			Zfp706	-0.233439	1.40584e-18
			Lims1	-0.202105	1.59688e-18
			Arhgap30	-0.255915	2.34217e-18
			Cxxc5	-0.269634	2.67203e-18
			Tmem176b	-0.318708	2.89589e-18
			Whrn	-0.260148	4.50102e-18
			Cd2ap	-0.222189	6.55241e-18
			Gcnt1	-0.289401	7.25005e-18
			Atp6v0a1	-0.251693	1.08512e-17
			Apc	-0.235368	1.36397e-17
			Fchsd2	-0.215045	1.97957e-17
			Irf2bpl	-0.269643	2.12369e-17
			Fosb	-0.251082	2.16619e-17
			Mid1ip1	-0.334717	2.18992e-17
			Rnf13	-0.200773	2.53144e-17
			Nbea	-0.347329	2.98317e-17
			Ptpra	-0.203922	3.43572e-17
			Numb	-0.203079	4.68381e-17
			H2-Eb1	-0.288593	5.19689e-17
			Cask	-0.273205	5.26722e-17
			Atrx	-0.231608	5.80814e-17
			Tmco1	-0.245806	7.37951e-17
			Tmem135	-0.205274	8.91451e-17
			Cryl1	-0.290657	9.26979e-17
			Wdr89	-0.379296	1.11579e-16
			Pnrc1	-0.203337	1.12123e-16
			Bank1	-0.346246	2.05032e-16
			Plxna4	-0.245011	2.46575e-16
			Slc7a8	-0.232513	3.31344e-16
			Fat3	-0.280573	5.64839e-16
			Pik3cg	-0.263953	6.07752e-16
			Ifi27	-0.27096	7.06459e-16
			Rprd1b	-0.346619	1.4824e-15
			Rab6b	-0.323245	3.33891e-15
			Scaf11	-0.213404	3.53294e-15
			Mpc1	-0.200433	3.66997e-15
			Hpgd	-0.277119	3.83933e-15
			Tmem63a	-0.30089	4.6654e-15
			Mrfap1	-0.200692	4.71541e-15
			Slmap	-0.23503	4.94406e-15
			Rasal3	-0.270943	5.53956e-15
			Sbf2	-0.206002	6.54513e-15
			Grap	-0.302253	7.21985e-15
			Tm9sf3	-0.205346	1.10588e-14
			Rtn1	-0.24891	1.22001e-14
			Rcbtb2	-0.238359	1.37395e-14
			Ptp4a3	-0.277645	1.72511e-14
			Abcg1	-0.306246	1.97716e-14
			Ighm	-0.211612	2.4354e-14
			Klhl6	-0.262419	2.65673e-14
			Dock11	-0.222195	2.93846e-14
			Klf6	-0.227167	3.14127e-14
			Casp1	-0.283064	3.33089e-14
			Scmh1	-0.253224	5.43092e-14
			Cd164	-0.211143	6.05451e-14
			Cyb5a	-0.22907	6.8171e-14
			Klf4	-0.348911	7.31125e-14
			Sncaip	-0.302398	7.49853e-14
			H2-Ab1	-0.261288	1.16738e-13
			Ppp1r10	-0.255245	1.17177e-13
			Dusp1	-0.219229	1.39142e-13
			Tjp1	-0.206286	2.13754e-13
			Edem1	-0.200317	2.37013e-13
			Ccnd1	-0.231495	3.12512e-13
			Gna15	-0.216331	3.12728e-13
			Kif1b	-0.227061	3.61786e-13
			Ndufc2	-0.215084	4.07077e-13
			Tlr7	-0.214105	4.18969e-13
			Atp5pb	-0.205113	7.38126e-13
			Tcirg1	-0.204006	7.55578e-13
			Gas6	-0.325684	1.03545e-12
			H1f2	-0.30528	1.34429e-12
			Lyl1	-0.258794	1.47345e-12
			Ktn1	-0.230075	1.57462e-12
			Taf1d	-0.285333	1.61555e-12
			Fez2	-0.212379	1.76724e-12
			ENSMUSG00000121501	-0.255094	1.83593e-12
			Rasa3	-0.26299	2.01461e-12
			Dusp7	-0.291617	2.78285e-12
			Camk2n1	-0.217684	2.85542e-12
			Hdac8	-0.254754	2.94392e-12
			Tmem100	-0.310749	3.16731e-12
			H2-Aa	-0.250956	3.37319e-12
			Clec5a	-0.25623	3.74499e-12
			Ier3	-0.242188	3.79081e-12
			Fer	-0.258938	3.82937e-12
			Sipa1	-0.202286	5.97251e-12
			Ets1	-0.304366	7.96046e-12
			Prkce	-0.239675	8.12609e-12
			Sgk1	-0.227603	9.18337e-12
			Slc24a3	-0.23239	1.03044e-11
			Lrch4	-0.263378	1.15979e-11
			Exoc6b	-0.203035	1.53133e-11
			Adap2os	-0.212171	1.87068e-11
			Dtx4	-0.240095	2.03834e-11
			Cep68	-0.289104	2.0922e-11
			Cxcl9	-0.533297	2.41468e-11
			Etv5	-0.238767	2.47085e-11
			Stab1	-0.26845	3.81326e-11
			Pcf11	-0.223163	3.89886e-11
			Fry	-0.260524	4.53411e-11
			Sh2b3	-0.267824	4.78124e-11
			9930111J21Rik2	-0.221329	4.98521e-11
			Hook3	-0.209895	4.98657e-11
			E2f3	-0.220759	6.45994e-11
			Kansl1l	-0.22358	6.95652e-11
			Plekhm3	-0.213993	8.42256e-11
			Nos1ap	-0.284255	1.07336e-10
			Cd302	-0.233782	1.3687e-10
			Ang	-0.206013	1.37524e-10
			Mcfd2	-0.235582	1.4627e-10
			Pacc1	-0.256549	1.50511e-10
			Ctsf	-0.211356	1.6461e-10
			Snrpe	-0.223851	1.75994e-10
			Gpr84	-0.250291	1.87211e-10
			Nfkbia	-0.213648	2.08574e-10
			Gpatch2l	-0.231015	2.6237e-10
			Pde4d	-0.270352	4.05473e-10
			Pard3b	-0.226959	4.38372e-10
			Kcnq1ot1	-0.270323	4.47774e-10
			Pttg1ip	-0.233014	5.27561e-10
			Arhgef6	-0.226761	5.73042e-10
			Abcd2	-0.242422	5.94293e-10
			Slc35c2	-0.249674	6.70049e-10
			Scn1b	-0.241447	8.04994e-10
			Lpxn	-0.21335	8.09607e-10
			Fscn1	-0.216963	8.13016e-10
			Top2b	-0.252917	9.64718e-10
			Ralgps2	-0.251217	1.067e-09
			Rmdn1	-0.229648	1.07698e-09
			Unc50	-0.23528	1.09356e-09
			Pdlim4	-0.25422	1.27537e-09
			Med12l	-0.232963	1.33506e-09
			Tubgcp5	-0.233617	1.37851e-09
			Pip4p1	-0.206368	1.39563e-09
			Pex2	-0.24609	1.55257e-09
			Hnrnpdl	-0.2043	1.78153e-09
			Smox	-0.212884	2.59043e-09
			Garnl3	-0.218886	3.17488e-09
			Nfam1	-0.214188	3.3044e-09
			Cbx4	-0.233171	4.20827e-09
			Themis2	-0.215973	4.8274e-09
			Gem	-0.306118	5.22846e-09
			Ccl9	-0.304767	7.61236e-09
			Iws1	-0.243713	1.02054e-08
			Zfp62	-0.240164	2.22962e-08
			Rin3	-0.222572	2.62462e-08
			Arap3	-0.253622	3.02807e-08
			Tln2	-0.214196	3.03504e-08
			Bin3	-0.264804	3.64615e-08
			Slc38a9	-0.216224	3.70396e-08
			Map7d1	-0.212819	5.04506e-08
			Traf3ip3	-0.230793	5.56082e-08
			Rassf1	-0.208988	5.8889e-08
			Tmem176a	-0.26379	5.96713e-08
			Spred2	-0.240277	6.55103e-08
			Amfr	-0.20573	9.23032e-08
			Dennd1c	-0.212672	9.31785e-08
			Dhx36	-0.222841	1.13057e-07
			Abhd6	-0.20252	1.18136e-07
			Nsmaf	-0.219378	1.23384e-07
			Bicd2	-0.216448	1.3136e-07
			Il4ra	-0.212221	1.439e-07
			Acox3	-0.204392	1.55593e-07
			Hnrnpr	-0.201313	1.5987e-07
			Ccdc88a	-0.209245	1.69089e-07
			Peak1	-0.225207	1.75326e-07
			Abcc3	-0.221568	1.83462e-07
			Sp4	-0.207606	3.17049e-07
			Gpr155	-0.237189	3.49608e-07
			Med7	-0.205279	3.75882e-07
			Kpna1	-0.204708	5.16673e-07
			Nt5dc1	-0.225238	5.28748e-07
			Ppp1r3b	-0.222107	6.83593e-07
			Enox2	-0.209393	7.1103e-07
			Tk2	-0.210375	7.53171e-07
			Tmem230	-0.21222	8.88894e-07
			Ccl5	-0.342977	9.20212e-07
			Ndufb2	-0.207303	1.05356e-06
			Hhex	-0.202846	1.32039e-06
			Emc2	-0.20297	1.56821e-06
			Hmg20a	-0.202854	1.74902e-06
			Gcc2	-0.219755	2.47589e-06
			Plp1	-0.227713	3.28205e-06
			Rnf146	-0.203489	4.23544e-06
			Stard8	-0.218966	4.72053e-06
			Dnttip2	-0.205835	4.72939e-06
			Igsf6	-0.213546	6.9101e-06
			Ripor2	-0.215102	7.14196e-06
			Mast4	-0.202578	7.47075e-06
			Wwp1	-0.204551	8.37191e-06
			Lsp1	-0.216602	9.36438e-06
			Bltp2	-0.209306	9.84819e-06
			Fgf13	-0.217349	1.51149e-05
			Topors	-0.202033	3.04486e-05

## Sheet: Supplementary Table 3
Supplementary Table 3. List of DEGs up and down regulated in HHcy diet (HHcy_VIVIT vs HHcy_EGFP) for females (from Figure 3E).
Vivit up			Vivit down
Gene	logFC	FDR	Gene	logFC	FDR
Fcgr4	0.553531	8.68622e-55	P2ry12	-0.567415	4.06594e-159
H2-Aa	0.466394	7.23285e-49	Siglech	-0.604199	5.38478e-157
Timp2	0.34425	2.58946e-46	Hexb	-0.309059	6.20302e-157
Lag3	0.287534	2.00197e-42	Selplg	-0.467865	2.89783e-140
H2-Eb1	0.409415	3.844e-41	Gng10	-0.466299	7.26948e-114
H2-Ab1	0.417021	5.33832e-40	Ier5	-0.518773	8.51675e-110
Mitf	0.329531	7.19487e-39	Olfml3	-0.445034	1.08662e-109
Prdx1	0.333606	2.67214e-34	Rhob	-0.512631	2.08591e-105
Slc1a3	0.297037	1.0971e-32	Rnase4	-0.521663	1.94213e-94
Stxbp3	0.379248	2.67895e-30	Btaf1	-0.497412	6.55317e-92
Cadm1	0.268031	1.74792e-28	Sparc	-0.440065	2.45908e-89
H2-Oa	0.352911	2.72084e-28	Samsn1	-0.526282	2.4385e-87
Wdr89	0.438146	7.43337e-28	Gpr34	-0.495235	2.62092e-86
Tmem106a	0.454076	2.66286e-27	Csf1r	-0.269079	1.00873e-85
Fmnl2	0.339442	7.7808e-26	Tmem119	-0.3656	3.79991e-85
Apoe	0.504451	1.04046e-25	Ubc	-0.38489	4.29126e-85
Ftl1-ps1	0.425224	5.94115e-25	Cst3	-0.374636	4.45322e-83
Evl	0.241778	2.07171e-24	Actg1	-0.373518	1.05735e-78
Ddhd1	0.50735	1.75435e-23	Mef2a	-0.312688	1.05735e-78
Cd74	0.349434	7.09806e-23	Uqcrb	-0.567672	6.75645e-77
Cd63	0.297563	8.08369e-23	Ywhah	-0.366481	1.51717e-73
Arid5b	0.315575	7.40135e-21	Arhgap5	-0.372558	4.55313e-71
Abca1	0.240514	1.39579e-20	Jund	-0.417296	2.8459e-69
Arhgap24	0.276546	2.88959e-18	Selenop	-0.382691	7.24295e-69
Stat1	0.247311	5.55734e-18	Serinc3	-0.239087	1.42661e-68
Carmil1	0.425312	1.24388e-17	Dgkd	-0.394718	4.67194e-68
Plaur	0.279274	3.92542e-17	H3f3a	-0.322912	7.30492e-67
Pld3	0.2968	4.03805e-17	Rsrp1	-0.376404	1.05326e-63
Sgpp1	0.368363	1.06359e-16	Elmo1	-0.315661	1.24243e-63
Fcgr2b	0.214324	5.4526e-16	Alox5ap	-0.388513	9.19463e-63
Atp13a2	0.299715	1.09048e-14	Zeb2os	-0.489348	1.1678e-62
Nrp1	0.242646	1.47597e-14	Vsir	-0.329993	1.74301e-60
Clec4a3	0.315488	2.43497e-14	Eif1	-0.263451	2.34857e-59
Malt1	0.358746	4.33052e-14	Ltc4s	-0.427034	2.69947e-59
Cpd	0.289203	2.28809e-13	Mcl1	-0.351767	3.04328e-59
Aff1	0.211228	1.68513e-12	Commd8	-0.526627	4.78984e-59
C4b	0.209128	4.56272e-12	Csmd3	-0.522474	6.89038e-59
Ciita	0.303226	3.26313e-11	Eif5	-0.407081	6.51706e-58
Itgax	0.290018	1.9775e-09	Ivns1abp	-0.408958	9.17547e-58
Cyth1	0.234374	2.88965e-09	Pag1	-0.362704	2.75534e-57
Il18bp	0.261717	1.58547e-08	Atf3	-0.388763	9.82795e-57
Ak2	0.202326	3.43968e-08	Apbb1ip	-0.327084	9.79411e-56
Ifih1	0.261181	2.18064e-07	Ddx5	-0.250332	1.10829e-55
Cers6	0.220176	9.15076e-07	Uba52	-0.339364	1.13918e-55
Ifit3	0.217394	2.68322e-05	Zfand5	-0.402382	9.23202e-55
Ccl5	0.237706	0.000120574	Evi2a	-0.362382	2.23668e-53
Mxd1	0.211514	0.00013495	Hsp90aa1	-0.452137	2.34797e-53
			Scoc	-0.371614	1.53141e-52
			Plxdc2	-0.270694	4.68973e-52
			Jun	-0.443631	1.01759e-48
			Capza2	-0.240547	5.18679e-48
			Clip1	-0.35177	2.36099e-47
			Pmp22	-0.407287	6.17426e-47
			Ifi27l2a	-0.399131	9.66342e-47
			Bin1	-0.2621	9.87799e-47
			Mpc1	-0.336944	1.116e-46
			Mef2c	-0.283384	2.3003e-46
			Ckb	-0.337579	2.69963e-46
			Pnrc1	-0.342931	4.40136e-46
			Mtdh	-0.24081	1.04571e-45
			Whrn	-0.403855	3.83039e-45
			Eeig2	-0.348587	4.45425e-45
			Srgap2	-0.279822	7.77221e-45
			Rhoa	-0.260593	7.97226e-45
			Golm1	-0.341239	1.99633e-44
			Gpr183	-0.521376	1.26838e-43
			Hpgds	-0.256206	2.11105e-43
			Gnas	-0.31437	2.94119e-43
			Pmepa1	-0.272557	8.84018e-43
			Klf2	-0.573398	1.25614e-42
			Fnip1	-0.276665	1.42248e-41
			Rbm3	-0.318539	4.64425e-41
			Ptma	-0.258084	2.76389e-40
			Oaz1	-0.255035	3.52368e-40
			Tpt1	-0.224966	8.06088e-40
			Cfh	-0.352319	1.22668e-39
			B2m	-0.242348	1.53827e-39
			Maml3	-0.309091	1.80253e-39
			Nptn	-0.313309	2.40781e-39
			Sft2d1	-0.271444	1.78044e-38
			Mat2a	-0.330651	4.95321e-38
			Bhlhe41	-0.398616	9.75344e-38
			Igkc	-0.529711	1.00352e-37
			Klf4	-0.549122	1.00352e-37
			Lcorl	-0.359521	1.39576e-37
			Cfl1	-0.224481	2.47692e-37
			Coro1a	-0.271149	3.44735e-37
			Smad7	-0.303958	5.6937e-37
			Ppia	-0.210966	8.88772e-37
			Klf6	-0.361176	1.13251e-36
			Numb	-0.305226	5.08426e-36
			Ptgs1	-0.254335	5.18249e-36
			Fus	-0.263407	6.00142e-36
			Dleu2	-0.272699	4.39878e-35
			Cd164	-0.348057	1.43339e-34
			Selenof	-0.280201	2.69039e-34
			Cltc	-0.278801	2.79573e-34
			Mrfap1	-0.303873	1.16565e-33
			Ogfrl1	-0.327805	1.17036e-33
			Inpp4b	-0.286644	1.24862e-33
			Tjp1	-0.343333	1.56805e-33
			Kctd12	-0.313122	2.28513e-33
			ENSMUSG00000121501	-0.41654	3.3036e-33
			Hsp90b1	-0.244605	3.81245e-33
			Usp2	-0.324533	1.14958e-32
			Taf1d	-0.448918	3.15645e-32
			Atp6v0d1	-0.293018	8.34928e-32
			Rgs2	-0.331433	1.353e-31
			Rap1a	-0.250027	2.70263e-31
			Pdia3	-0.256535	2.8342e-31
			Pde3b	-0.250779	2.93249e-31
			Evi2b	-0.372299	4.3314e-31
			P2ry13	-0.312102	4.36741e-30
			Klf7	-0.386384	4.80891e-30
			Slc38a2	-0.347992	6.56529e-30
			Cmtm6	-0.31082	7.26176e-30
			Srsf3	-0.277558	7.62343e-30
			Trf	-0.254309	9.02482e-30
			Rapgef5	-0.278913	1.11873e-29
			Ifitm10	-0.429076	1.528e-29
			Cry1	-0.468927	1.69231e-29
			Cnbp	-0.284155	2.98538e-29
			Tsc22d2	-0.323928	3.16667e-29
			Rbm26	-0.278771	3.35914e-29
			Ptpra	-0.262146	3.80144e-29
			Sec11c	-0.325121	4.92207e-29
			Man1a	-0.296218	5.08241e-29
			St3gal6	-0.25461	6.09438e-29
			Rilpl1	-0.367759	8.48252e-29
			Ppp1r14b	-0.31206	1.10752e-28
			Lrrc3	-0.397548	1.14003e-28
			Saraf	-0.241831	1.17626e-28
			Chn2	-0.312624	5.77411e-28
			Fos	-0.279315	1.05787e-27
			Il1a	-0.316368	2.39385e-27
			Irf2bpl	-0.330257	2.5788e-27
			Hspa5	-0.257567	6.96134e-27
			Lyl1	-0.393565	1.05133e-26
			Plek	-0.250269	1.41924e-26
			Btg2	-0.242228	1.69145e-26
			Hnrnpk	-0.233705	4.19621e-26
			Tmsb10	-0.318102	7.90469e-26
			Arhgap45	-0.257603	9.72708e-26
			Ly86	-0.206848	1.27338e-25
			Zfp36	-0.238626	3.87018e-25
			Atf4	-0.336612	4.44667e-25
			Rab3ip	-0.401712	4.70213e-25
			Ecscr	-0.361833	5.5307e-25
			Rab31	-0.276636	1.18097e-24
			Tbc1d16	-0.266419	3.72178e-24
			Mpp7	-0.343192	4.66765e-24
			Atp5mpl	-0.301158	4.84001e-24
			Ank2	-0.252017	5.81215e-24
			Btf3	-0.215527	6.25503e-24
			Map4k4	-0.218083	1.09698e-23
			Srsf2	-0.261333	1.52426e-23
			Rtn4	-0.230079	2.49209e-23
			Slc2a5	-0.380396	2.51731e-23
			Bbs9	-0.325536	2.95889e-23
			Ifngr1	-0.208091	3.41204e-23
			Il6st	-0.272636	3.73853e-23
			Zeb1	-0.285003	3.73853e-23
			Ang	-0.311782	5.04128e-23
			Tacc1	-0.220449	5.32634e-23
			Ncl	-0.234851	9.09356e-23
			Rgs1	-0.391231	1.23219e-22
			Wsb1	-0.254568	1.46663e-22
			Slc37a2	-0.376318	1.72932e-22
			Hpgd	-0.383819	1.76308e-22
			Edem1	-0.261147	2.04644e-22
			Septin7	-0.270303	3.45362e-22
			Cacnb2	-0.255737	4.19491e-22
			Hnrnpdl	-0.317368	5.78904e-22
			Clk1	-0.222568	6.28807e-22
			Ndufb1	-0.290361	1.30803e-21
			Agmo	-0.26359	1.3847e-21
			Tlr7	-0.266785	2.43522e-21
			Grap	-0.371269	2.67552e-21
			Tmem86a	-0.290067	2.96161e-21
			Rnase6	-0.400855	3.426e-21
			Npm1	-0.213159	3.54061e-21
			Gnl3	-0.345725	4.19032e-21
			Arid3b	-0.372883	5.17178e-21
			Garnl3	-0.343888	5.4492e-21
			Kansl1l	-0.334087	5.62641e-21
			Sox4	-0.431158	6.50876e-21
			Entpd1	-0.22613	8.7444e-21
			Nav2	-0.204439	9.22465e-21
			Rasgrp3	-0.219228	1.01108e-20
			Hcar2	-0.343327	1.23092e-20
			Herpud1	-0.238545	1.3335e-20
			Nrros	-0.22302	2.15576e-20
			Atp2c1	-0.297529	2.33679e-20
			Dusp3	-0.327272	2.63117e-20
			Plcl1	-0.212017	2.71598e-20
			Dnaja1	-0.300717	7.0844e-20
			Gspt1	-0.232717	7.1322e-20
			Dock10	-0.200592	7.42505e-20
			Oxr1	-0.287351	8.48577e-20
			Arsb	-0.303356	9.54172e-20
			Casp1	-0.324318	9.55385e-20
			Bcor	-0.302608	1.13921e-19
			Hhex	-0.383509	1.26071e-19
			Cct4	-0.283835	1.37698e-19
			Spag9	-0.224394	1.40744e-19
			Phgdh	-0.381079	1.73084e-19
			Mylip	-0.208492	2.20094e-19
			Klhl6	-0.294552	2.83447e-19
			Adgrg1	-0.272309	2.97201e-19
			Pnp	-0.246906	3.07621e-19
			Junb	-0.208913	3.76279e-19
			Tcn2	-0.236239	5.90923e-19
			Hnrnpu	-0.201022	6.99165e-19
			H2-M3	-0.254477	7.8036e-19
			Zfp706	-0.227289	7.84486e-19
			Gas5	-0.200719	8.54701e-19
			Hmgn2	-0.328242	1.37252e-18
			Tagln2	-0.278949	2.17007e-18
			Sgk1	-0.277084	2.3565e-18
			Tra2b	-0.212379	3.40358e-18
			Srsf7	-0.238362	4.31333e-18
			Tom1	-0.306222	5.85029e-18
			Hnrnpa0	-0.210637	6.80139e-18
			Azin1	-0.252411	7.16925e-18
			Cap1	-0.216099	8.65099e-18
			Jpt1	-0.237227	8.6694e-18
			Maf	-0.225203	1.11149e-17
			Rnf2	-0.253634	2.32988e-17
			Gem	-0.42681	3.10169e-17
			Hdac9	-0.288811	4.30417e-17
			Smad3	-0.229932	6.1898e-17
			Ndel1	-0.208788	6.95903e-17
			Mindy2	-0.236625	7.98959e-17
			Swap70	-0.300728	8.97559e-17
			Cask	-0.276822	9.21769e-17
			Nfia	-0.216963	9.36364e-17
			Mob3c	-0.301164	9.7246e-17
			Ube2h	-0.213344	1.13616e-16
			Casp4	-0.237147	1.29779e-16
			Erf	-0.317547	1.36116e-16
			Cirbp	-0.299078	1.37098e-16
			Cds1	-0.251932	1.62596e-16
			Dennd5a	-0.21774	1.6697e-16
			Reep5	-0.214523	2.37815e-16
			Cebpd	-0.407006	3.19288e-16
			Ubn1	-0.234643	3.596e-16
			Vps37b	-0.223787	3.72958e-16
			Dyrk1a	-0.248121	3.90981e-16
			Gna15	-0.240384	4.64477e-16
			Zfp36l2	-0.210819	5.64378e-16
			Mid1ip1	-0.334682	7.27807e-16
			H2az1	-0.2046	7.73024e-16
			Rin2	-0.214492	8.11853e-16
			Eif3j1	-0.246373	8.11853e-16
			Ralb	-0.280743	8.46882e-16
			Irf5	-0.203964	8.46882e-16
			Ddx3x	-0.225345	8.86582e-16
			Txnip	-0.226799	8.90075e-16
			St3gal5	-0.231309	1.06231e-15
			Sec61g	-0.204444	1.0741e-15
			Prkca	-0.228045	1.0882e-15
			Akirin2	-0.234736	1.79955e-15
			Tmed5	-0.206015	1.93447e-15
			Cdh23	-0.292989	1.94511e-15
			Atp13a3	-0.250926	2.30812e-15
			Cul1	-0.220336	2.46444e-15
			Atrx	-0.215839	2.55076e-15
			Mfng	-0.321203	2.88423e-15
			Hnrnpa1	-0.215281	3.21742e-15
			Bach1	-0.214982	3.56415e-15
			Tmem100	-0.34445	3.82966e-15
			Slc24a3	-0.28833	4.96483e-15
			Cbx4	-0.309185	5.30161e-15
			Ppp1r15a	-0.251999	5.50445e-15
			Trpm7	-0.241106	6.41447e-15
			Ulk2	-0.244185	6.58161e-15
			Cdk2ap1	-0.286761	7.77661e-15
			Cops4	-0.239217	8.92454e-15
			Slc16a10	-0.308918	9.16981e-15
			Dusp1	-0.223538	1.05531e-14
			Jup	-0.307237	1.067e-14
			Fosb	-0.229154	1.3244e-14
			Atp5pb	-0.205246	1.37084e-14
			Lat2	-0.231693	1.48242e-14
			E2f3	-0.254239	1.73772e-14
			Arpc5l	-0.273416	1.74971e-14
			Atg3	-0.270681	1.96636e-14
			Mbtd1	-0.239579	2.13105e-14
			Ptpro	-0.275528	2.36844e-14
			Serinc1	-0.215257	2.88282e-14
			Sh2b3	-0.304305	3.13644e-14
			Memo1	-0.250786	3.24785e-14
			Abcb1b	-0.312411	3.59023e-14
			Nfkbid	-0.214717	3.88807e-14
			Ier2	-0.250241	3.94139e-14
			Optn	-0.256243	4.95921e-14
			Acads	-0.294404	5.8153e-14
			Mctp1	-0.238168	6.25411e-14
			Gal3st4	-0.226113	7.19676e-14
			Snx30	-0.221417	1.0187e-13
			Fkbp5	-0.27267	1.04991e-13
			Tgfb1	-0.200838	1.16855e-13
			Susd3	-0.225238	1.33458e-13
			Usp24	-0.247048	1.3856e-13
			Slc44a2	-0.297028	1.50077e-13
			Sik2	-0.200147	1.5354e-13
			Eef2k	-0.273004	1.54481e-13
			Cxxc5	-0.22508	1.7038e-13
			Socs3	-0.200887	1.90335e-13
			Thoc2l	-0.28536	1.99607e-13
			Tmx4	-0.313281	2.09052e-13
			Rybp	-0.261307	2.16376e-13
			Snhg8	-0.238724	2.69934e-13
			Tmc7	-0.34556	3.16465e-13
			Orai2	-0.247057	3.39205e-13
			Emc2	-0.288539	4.18357e-13
			Bmyc	-0.227676	6.23423e-13
			Bzw1	-0.216572	6.84822e-13
			Crybb1	-0.204339	7.46142e-13
			Ctsf	-0.244711	7.54143e-13
			Ube2g1	-0.253871	7.93539e-13
			Abcd2	-0.282623	8.33473e-13
			Psmc6	-0.245235	8.33473e-13
			Ndufa1	-0.25941	1.05883e-12
			Cggbp1	-0.257577	1.11372e-12
			Vps26a	-0.233435	1.20527e-12
			Chsy1	-0.316479	1.47007e-12
			Cebpz	-0.205496	2.25621e-12
			Fkbp2	-0.216736	2.25621e-12
			Tnfaip3	-0.209099	2.3974e-12
			Sptssa	-0.232182	2.62952e-12
			Ccng2	-0.323302	2.66745e-12
			Impact	-0.211268	2.75767e-12
			Samd8	-0.231758	3.43668e-12
			Maco1	-0.299253	3.57063e-12
			Pcf11	-0.242952	3.77652e-12
			Lsp1	-0.331652	3.8907e-12
			Vps18	-0.256888	4.11866e-12
			Ostc	-0.242549	4.21724e-12
			U2surp	-0.209893	5.02005e-12
			Eno1	-0.247498	5.50505e-12
			Inka1	-0.29421	5.63504e-12
			Neat1	-0.235278	5.96978e-12
			H2-K2	-0.280946	6.04425e-12
			Mzt2	-0.247304	8.84685e-12
			Txnl1	-0.229248	1.06943e-11
			Fez2	-0.204466	1.10071e-11
			Gls	-0.202701	1.10291e-11
			Atp5md	-0.217134	1.2027e-11
			Nfkbia	-0.227706	1.32124e-11
			Fry	-0.285391	1.44206e-11
			Klf12	-0.232652	1.4589e-11
			Cd302	-0.246932	1.62387e-11
			Cxcl9	-0.44733	1.63276e-11
			Sap18	-0.268338	1.66538e-11
			Bcl2a1a	-0.233456	1.70243e-11
			Hmox1	-0.349676	2.07555e-11
			Prag1	-0.263346	2.07555e-11
			Tmem176b	-0.266869	2.31029e-11
			Hnrnph1	-0.220105	2.93901e-11
			Gclc	-0.306783	2.97959e-11
			Iffo1	-0.237623	3.15933e-11
			Tmem37	-0.249654	3.67695e-11
			Sdk1	-0.234924	4.08633e-11
			Abhd15	-0.295317	4.49088e-11
			Klhl7	-0.210641	5.31893e-11
			Stambpl1	-0.253271	5.66205e-11
			Nudt4	-0.276769	6.68173e-11
			Vdac1	-0.241243	6.68173e-11
			Slc35c2	-0.259779	6.69084e-11
			Ms4a6b	-0.268709	7.13065e-11
			Mafg	-0.206571	7.42573e-11
			Dcun1d5	-0.205215	9.06381e-11
			Lysmd4	-0.241678	9.25522e-11
			Scp2	-0.242979	9.6689e-11
			Dek	-0.202084	9.76308e-11
			Cct6a	-0.240771	1.20985e-10
			Zranb1	-0.232338	1.24372e-10
			Rsl1d1	-0.239396	1.44153e-10
			Sh2b2	-0.240478	1.48806e-10
			Sall3	-0.229108	1.50764e-10
			Rassf1	-0.235379	1.51951e-10
			Papss1	-0.225484	1.89426e-10
			H2bc4	-0.265299	2.52728e-10
			Tpm4	-0.281649	2.53991e-10
			Vps35	-0.203497	2.79429e-10
			Vis1	-0.235051	2.83205e-10
			Pacc1	-0.226371	2.86107e-10
			Gas6	-0.291946	3.28315e-10
			Ccdc47	-0.228454	3.64052e-10
			Kcnk6	-0.219324	3.64052e-10
			Tsc22d3	-0.229096	3.91188e-10
			Igsf6	-0.269552	4.0722e-10
			Med7	-0.240995	4.86312e-10
			Slc12a2	-0.253366	4.86655e-10
			Spred2	-0.2645	5.41373e-10
			Anapc16	-0.232151	6.9427e-10
			Kcnq1ot1	-0.277568	6.97829e-10
			Acox3	-0.21786	7.21666e-10
			Sec24a	-0.222463	7.91038e-10
			Eloc	-0.207584	8.0138e-10
			Adam15	-0.201469	9.35356e-10
			Il17ra	-0.228536	1.00461e-09
			Rtn1	-0.213645	1.23262e-09
			Cacul1	-0.209515	1.33348e-09
			Tasl	-0.237697	1.46727e-09
			Cables1	-0.268481	1.48214e-09
			Lpar6	-0.257873	1.58504e-09
			Snx8	-0.22138	1.6417e-09
			Polr2k	-0.248118	1.74359e-09
			Ppp1r10	-0.225665	1.88012e-09
			Lsm6	-0.201618	1.9775e-09
			Prkce	-0.220371	2.03532e-09
			Cep85l	-0.228701	2.04606e-09
			Larp4	-0.21212	2.29695e-09
			Xlr	-0.234209	3.56165e-09
			Lamtor3	-0.225157	3.62116e-09
			Cep43	-0.208111	4.48489e-09
			Slc25a33	-0.22498	4.65855e-09
			Zbtb11	-0.225415	4.74431e-09
			Rasal3	-0.204098	4.9441e-09
			Zfp467	-0.253988	5.54833e-09
			Adrb2	-0.222839	5.59836e-09
			Rhobtb1	-0.201081	5.70187e-09
			Cycs	-0.20413	5.75576e-09
			Apba1	-0.218799	6.37108e-09
			Fam219a	-0.205378	6.63883e-09
			Cdc42se1	-0.21715	6.65275e-09
			Tex2	-0.270991	7.1093e-09
			Tmem176a	-0.303326	8.65138e-09
			Tspan4	-0.229933	9.59926e-09
			Txndc15	-0.212247	9.61884e-09
			Tle3	-0.238844	1.03964e-08
			Camkk2	-0.206107	1.07566e-08
			Pdlim4	-0.239511	1.23909e-08
			Fcrls	-0.21578	1.37553e-08
			Tnf	-0.24739	1.47959e-08
			Stab1	-0.245237	1.51851e-08
			Zfp654	-0.243398	1.56008e-08
			Epc1	-0.212386	1.80925e-08
			Fhit	-0.209363	1.90075e-08
			Snhg1	-0.217238	2.30379e-08
			Lrba	-0.221874	2.40677e-08
			Prpsap2	-0.210494	2.61149e-08
			Tmem63a	-0.213457	2.68145e-08
			Appbp2	-0.207521	2.78907e-08
			Bbip1	-0.201798	3.22102e-08
			Ints6	-0.279164	3.7655e-08
			Sun2	-0.204241	3.92612e-08
			Ets1	-0.257481	4.2259e-08
			Wwp1	-0.239049	4.44581e-08
			Smc6	-0.21266	4.44581e-08
			Nop56	-0.221325	5.08344e-08
			Rab35	-0.221843	6.66558e-08
			Slirp	-0.213274	6.72628e-08
			Cpeb2	-0.245375	7.30254e-08
			Batf	-0.226763	7.66358e-08
			Txn2	-0.211073	9.50477e-08
			Vps37a	-0.216943	9.63934e-08
			Tvp23b	-0.21551	9.95834e-08
			Igf1r	-0.21145	1.00048e-07
			N4bp2l1	-0.20241	1.00775e-07
			Tnfrsf13b	-0.210754	1.00775e-07
			Ssbp1	-0.206012	1.02517e-07
			Tln2	-0.203479	1.04373e-07
			Cmtm3	-0.213909	1.34896e-07
			Alkbh5	-0.207327	1.4558e-07
			Slc25a45	-0.221736	1.50523e-07
			Cacybp	-0.215949	1.67919e-07
			Arf2	-0.22293	1.78508e-07
			Mob3a	-0.221852	1.89147e-07
			Tubb2a	-0.230688	2.55505e-07
			Erh	-0.217392	2.75961e-07
			Ipo5	-0.205005	2.86905e-07
			Dhx40	-0.31508	2.98083e-07
			Stt3b	-0.207834	3.5735e-07
			Mtmr10	-0.229351	3.74653e-07
			Nasp	-0.243833	4.86088e-07
			Ldb1	-0.202746	5.12562e-07
			Bank1	-0.24224	5.25938e-07
			Ap1s2	-0.222324	5.77513e-07
			Zfp62	-0.213142	5.84972e-07
			Nt5dc3	-0.206251	6.07687e-07
			Phf23	-0.200873	6.57103e-07
			Ube2q2	-0.210491	7.34863e-07
			Myo1b	-0.241033	8.71394e-07
			Cfap74	-0.202714	9.26426e-07
			Fmnl1	-0.209563	9.26715e-07
			Nmt2	-0.225304	9.63051e-07
			Por	-0.208218	9.66748e-07
			Ern1	-0.203334	1.18656e-06
			Sertad2	-0.206121	1.20857e-06
			Rbbp8	-0.227648	1.23904e-06
			Rfx7	-0.2084	1.38951e-06
			Ncoa6	-0.200191	1.38951e-06
			Ube2v2	-0.202907	1.50699e-06
			D17H6S56E-5	-0.294955	1.50908e-06
			Pde4d	-0.234787	1.54746e-06
			Dcun1d1	-0.206323	1.78749e-06
			Lmna	-0.206558	1.81031e-06
			Dusp7	-0.202615	3.12842e-06
			Slc40a1	-0.228927	3.23736e-06
			Vezf1	-0.205016	3.26603e-06
			Lin54	-0.203713	3.30658e-06
			Dnajb4	-0.214505	3.82275e-06
			Zcchc14	-0.204134	4.16136e-06
			Dnajb1	-0.239162	4.53688e-06
			Tspan9	-0.217959	5.01992e-06
			Gpr155	-0.216558	5.07006e-06
			Nos1ap	-0.214579	6.20423e-06
			Mtss1	-0.225305	8.11103e-06
			Shb	-0.207684	9.1704e-06
			Mgll	-0.201097	1.08528e-05
			Ppm1l	-0.208111	1.48218e-05
			St3gal2	-0.203018	1.87814e-05
			Ccl9	-0.220174	5.5162e-05
			Ccl2	-0.237816	8.21979e-05

## Sheet: Supplementary Table 4
Supplementary Table 4. List of DEGs up and down regulated by HHcy (Hhcy_EGFP vs CT_EGFP) for males (Figure 4A)
HHcy Up			HHcy down
Gene	logFC	FDR	Gene	logFC	FDR
Ly86	0.492128	7.1139e-88	Cst3	-0.588117	2.31912e-116
H2-D1	0.61104	1.19023e-80	P2ry12	-0.537622	1.40196e-88
Rplp2	0.455179	1.45628e-72	Ttr	-0.717715	1.74797e-87										1
Lyn	0.42211	1.24108e-69	Rhob	-0.60027	8.96008e-86
B2m	0.47958	2.72358e-69	Btg2	-0.588878	8.9628e-83
Lrmda	0.479083	4.69812e-65	Ubc	-0.5259	4.69887e-81
Uba52	0.490087	6.41758e-65	Jun	-0.75356	2.8093e-78
Dock2	0.379028	2.20151e-61	Ckb	-0.527368	1.46661e-77
Nsa2	0.50128	2.79481e-57	H3f3b	-0.541085	3.78369e-71
Hk2	0.474137	6.65807e-53	Fcrls	-0.731951	1.54404e-65
Cadm1	0.465427	1.03567e-51	Ier5	-0.50911	6.41758e-65
Timp2	0.463527	1.76978e-50	Sparc	-0.463131	6.20608e-63
Ppm1h	0.416727	2.08503e-50	Selenop	-0.419373	1.40148e-54
Cyrib	0.306328	2.50367e-50	Jund	-0.480537	1.06171e-50
Ctsb	0.400758	2.3924e-48	Tmx4	-0.807494	1.49588e-48
Pnpla7	0.448935	5.31538e-47	Klf6	-0.516925	2.96276e-45
Diaph2	0.361165	7.80074e-46	Tuba1a	-0.696782	1.26271e-41
Ptprc	0.341309	1.55139e-43	Olfml3	-0.32947	1.86914e-41
Igkc	0.817649	2.43008e-43	Ier2	-0.570276	1.27999e-40
Zfas1	0.555196	2.10458e-42	Klf2	-0.757149	1.48333e-38
P4ha1	0.51088	7.76976e-41	Rnase4	-0.379614	1.33476e-34
Rrbp1	0.291989	1.56647e-40	Atf3	-0.397252	1.25413e-30
Dpy19l4	0.485741	4.09141e-40	Selplg	-0.255507	3.82095e-28
Fau	0.335971	6.95319e-40	Klf4	-0.649474	1.35067e-26
Frmd4b	0.316251	6.95319e-40	Actg1	-0.283689	4.2079e-25
Lhfpl2	0.421365	9.23718e-40	Txnip	-0.361616	6.67749e-25
Gns	0.314157	2.39769e-39	Gnas	-0.311749	2.04785e-24
Trim30a	0.433499	2.72234e-39	Junb	-0.324847	2.147e-24
Tns3	0.35713	4.30512e-38	Dusp1	-0.379819	1.21763e-23
Pvt1	0.422096	8.88856e-38	H2-Aa	-0.468378	1.62187e-23
Abr	0.444242	2.06844e-37	Basp1	-0.221332	1.87268e-23
Cept1	0.442904	4.29353e-37	Commd8	-0.37461	1.07545e-22
Lag3	0.334882	9.37203e-37	Cmtm6	-0.309446	1.09186e-22
Rbpj	0.454808	1.26995e-36	Ubb	-0.203801	9.18047e-22
Etv6	0.3501	1.27784e-36	Ifitm10	-0.433839	1.39828e-21
Irf2	0.347385	3.67261e-36	Hspa5	-0.277588	3.51491e-21
Snrpg	0.40616	3.77323e-36	Mrfap1	-0.281858	3.73341e-21
Cd52	0.484794	9.10524e-36	Ptpro	-0.424851	5.90469e-21
Adam10	0.357947	2.06004e-34	Pnp	-0.289281	3.51499e-20
Acer3	0.370845	2.48745e-34	Fos	-0.324105	3.89459e-20
Cmss1	0.49098	1.26656e-33	Gpr34	-0.282549	4.00915e-20
Skap2	0.310759	1.50282e-33	Ppp1r14b	-0.298485	2.1251e-18
Ophn1	0.307275	1.66383e-33	Neurl3	-0.338781	7.97933e-18
H2-K1	0.393328	1.77358e-33	Gnb2	-0.21449	2.67499e-17
Vps54	0.429984	3.70553e-33	H2-Eb1	-0.373965	7.75779e-17
Fyb	0.306949	4.44536e-33	Ecscr	-0.34614	7.82601e-17
Cd9	0.280937	6.21441e-33	Zfp36	-0.253581	9.73989e-17
Actr2	0.312067	7.21445e-33	Whrn	-0.312399	5.43785e-16
Hivep3	0.337654	1.00438e-32	Ltc4s	-0.270654	8.11961e-16
Grn	0.283073	1.02685e-32	Zeb2os	-0.274018	8.49837e-16
Mpeg1	0.318648	1.05646e-32	H2bc4	-0.477374	8.6488e-16
Atp8a1	0.329098	2.66275e-32	Nfkbia	-0.346383	3.28613e-15
Pan3	0.335254	2.66275e-32	D17H6S56E-5	-0.560248	3.55618e-15
Zeb2	0.303777	3.35212e-32	H2-Ab1	-0.373007	3.62405e-15
Pla2g4a	0.409093	2.58405e-31	Tgfb1	-0.258811	6.22587e-15
Wnk1	0.284574	2.66726e-31	Cebpd	-0.429591	2.23476e-14
Ctss	0.247153	4.78558e-31	Fscn1	-0.329691	2.2362e-14
Camk1d	0.29569	2.00971e-30	Bcor	-0.333104	6.55909e-14
Hif1a	0.41844	1.03495e-29	Zfand5	-0.264419	8.47833e-14
Rasgef1b	0.41096	1.0868e-29	Icam1	-0.339595	9.48904e-14
Ripk2	0.459491	1.2716e-29	Klk8	-0.331919	1.9277e-13
Prkcb	0.310954	2.5758e-29	Ppp1r15a	-0.315695	2.0559e-13
Soat1	0.422454	2.90347e-29	Snx17	-0.267741	5.21343e-13
Sppl2a	0.354149	8.30237e-29	Trim47	-0.390537	6.46838e-13
Ly6e	0.288485	8.91852e-29	Rgs2	-0.262671	7.78662e-13
Trim34a	0.565759	1.33286e-28	Pmp22	-0.264033	8.78853e-13
Atp8a2	0.302903	2.83921e-28	Cables1	-0.392368	1.74377e-12
Exoc4	0.297453	6.55473e-28	Inka1	-0.354995	1.88838e-12
Fmnl2	0.448647	6.99081e-28	Tsc22d3	-0.294518	3.53265e-12
Usp25	0.384424	7.08205e-28	Pnrc1	-0.211395	4.16364e-12
Picalm	0.294351	8.30396e-28	Ly6a	-0.354719	5.92391e-12
Celf2	0.233559	1.71441e-27	Slc2a5	-0.307959	1.04838e-11
Vmp1	0.314308	1.95827e-27	P2ry13	-0.216459	1.71806e-11
C1qa	0.256915	1.99514e-27	Pdlim4	-0.323328	2.5277e-11
Mitf	0.338367	3.24656e-27	Sox4	-0.388648	3.69472e-11
Nrp1	0.4179	4.25049e-27	Map1lc3a	-0.288806	4.05866e-11
Extl3	0.362552	4.75579e-27	Glul	-0.220329	4.70267e-11
Tra2a	0.295022	5.16287e-27	Sec11c	-0.226676	1.13034e-10
Cux1	0.297916	5.73291e-27	Stab1	-0.326211	2.01398e-10
Arid5b	0.454947	1.00889e-26	Hfe	-0.322079	4.83603e-10
Sh3kbp1	0.28878	1.09697e-26	Idh2	-0.301432	5.48499e-10
Cd48	0.385451	1.87498e-26	Ppp1r10	-0.278685	5.56987e-10
Herc6	0.503581	2.33222e-26	Sqor	-0.327182	9.9176e-10
Gas5	0.303309	3.96965e-26	Tmem176b	-0.267976	1.38702e-09
Lrp1	0.303072	4.32768e-26	Cbx4	-0.290581	2.22932e-09
Tbl1xr1	0.345545	4.84551e-26	Nfkbiz	-0.251364	3.19994e-09
Parp14	0.452643	5.19204e-26	Susd3	-0.209422	3.77818e-09
Epb41l2	0.240906	5.56374e-26	Mgll	-0.311379	1.53547e-08
Npc2	0.288621	6.46308e-26	Uqcrb	-0.20798	1.54172e-08
Lst1	0.359387	7.44344e-26	Ddx3x	-0.207856	2.68931e-08
Rack1	0.268423	7.51355e-26	Dhx40	-0.39019	4.08807e-08
Pfkfb3	0.35835	8.15304e-26	Fosb	-0.217609	6.25359e-08
C1qb	0.220111	8.77183e-26	Naxe	-0.241837	1.12555e-07
Lgals3bp	0.373562	1.50625e-25	Arid3a	-0.312217	1.14845e-07
ENSMUSG00000095041	0.297193	1.58901e-25	Erf	-0.241246	1.2667e-07
Chd7	0.284767	1.76409e-25	Acads	-0.240871	1.26853e-07
H2-T23	0.324745	1.76409e-25	Sertad1	-0.306972	1.76538e-07
Epsti1	0.327016	4.32047e-25	H1f2	-0.277583	2.01611e-07
Ptprj	0.287606	4.47814e-25	Ptp4a3	-0.211659	6.38921e-07
Atp5e	0.316497	9.43719e-25	Tubb2a	-0.246404	9.73472e-07
Dennd1b	0.389432	2.10236e-24	Chka	-0.236717	1.32959e-06
Cd84	0.290058	7.62035e-24	Tmem176a	-0.268043	2.28067e-06
Lair1	0.204982	1.19917e-23	Arhgef40	-0.292728	2.46504e-06
Pitpnc1	0.329037	1.87194e-23	Osm	-0.267473	4.58875e-06
Cops9	0.375333	1.95685e-23	Nherf1	-0.228983	4.80437e-06
Tnfrsf1b	0.328293	3.07733e-23	Rgs19	-0.208359	4.96784e-06
Ubash3b	0.276027	3.97682e-23	Prkce	-0.20039	1.19202e-05
Bltp1	0.38594	4.08346e-23	Mfng	-0.207536	1.36503e-05
Hltf	0.431191	4.08346e-23	Card19	-0.220907	1.47406e-05
Abi1	0.300032	5.45295e-23	Shb	-0.251537	1.47761e-05
Clint1	0.266184	6.44079e-23	Rab6b	-0.222732	2.10885e-05
Ranbp2	0.380104	1.1843e-22	Rgs3	-0.248887	4.91504e-05
Cd180	0.340611	1.47665e-22	Gem	-0.260472	0.000122195
Usp8	0.307107	1.56936e-22	Cd74	-0.208258	0.000232269
Btg1	0.253035	1.62743e-22	Chst8	-0.29949	0.00029117
Etnk1	0.336249	1.70252e-22	Arrdc3	-0.231114	0.000500971
Pros1	0.321822	1.90603e-22	Cxcl9	-0.271776	0.00222487
Tbc1d5	0.254932	6.19842e-22	Khdrbs3	-0.2145	0.00223863
Naip2	0.365156	6.99699e-22	Errfi1	-0.205202	0.00339735
Tsc22d2	0.356391	7.06791e-22
Acsl4	0.353302	8.41228e-22
BC005537	0.353941	1.00803e-21
Dpysl2	0.292234	1.0192e-21
Tmem131	0.374903	1.19337e-21
Lrch1	0.240981	1.35569e-21
Cox17	0.361758	1.42042e-21
Stxbp3	0.369561	1.67533e-21
Gatm	0.359433	1.76418e-21
Vps13c	0.457439	1.99626e-21
Tpd52	0.343048	2.04239e-21
Runx1	0.254621	2.29246e-21
Nek7	0.255018	2.61479e-21
Lrch3	0.309767	6.03465e-21
Camk2d	0.254282	6.60373e-21
Mdm4	0.381961	6.75051e-21
Trip12	0.305106	7.60067e-21
Pcbp2	0.251623	9.31689e-21
Irf2bp2	0.245515	1.13641e-20
Tlk1	0.375908	1.67813e-20
Nudcd3	0.333088	1.82363e-20
Ap3b1	0.263058	1.836e-20
Actr3	0.239796	1.98686e-20
Gna13	0.278111	2.60084e-20
Sem1	0.30784	2.83455e-20
Ankfy1	0.352466	3.07958e-20
Maml2	0.256266	3.09941e-20
Prkch	0.356933	3.58916e-20
Lyst	0.373068	3.90671e-20
Sema4d	0.297208	5.39943e-20
Ddx60	0.54327	5.39943e-20
Uty	0.371201	6.13086e-20
Gsap	0.315403	7.58366e-20
Plekho2	0.269746	9.40595e-20
Lnpep	0.281784	1.03591e-19
Adam17	0.300778	1.10096e-19
Atp2b1	0.285948	1.1191e-19
Sp100	0.352786	1.18837e-19
Cd86	0.319153	1.47549e-19
Rbm25	0.233437	1.68534e-19
Gnaq	0.228446	1.95316e-19
Fcho2	0.267066	2.01384e-19
Rere	0.257482	3.0116e-19
Nf1	0.262289	3.16565e-19
Parp9	0.349237	3.41245e-19
Irak2	0.244053	3.50603e-19
Pum2	0.27621	4.03477e-19
Ctsc	0.312031	4.21648e-19
Trim30d	0.349871	5.61444e-19
Ubap2l	0.29692	5.61444e-19
Dram2	0.318654	5.94029e-19
Eif2ak2	0.375324	6.02406e-19
Galnt7	0.379743	9.60644e-19
Ctsl	0.202616	9.67774e-19
Marf1	0.38497	9.84074e-19
Snhg8	0.349132	1.02675e-18
Cox7c	0.258215	1.03671e-18
Trim12c	0.41304	1.07308e-18
Sh3bp2	0.396833	1.07387e-18
Atf6	0.315887	1.19261e-18
Snrpf	0.366007	1.39991e-18
Apobec1	0.347504	1.42393e-18
Luc7l2	0.220041	1.47844e-18
Akt3	0.333022	1.53519e-18
Nup98	0.281792	1.69304e-18
Slf2	0.372177	1.74019e-18
Suclg2	0.337986	1.9209e-18
Strn3	0.292407	2.08413e-18
Itpr2	0.239495	2.29801e-18
Ehd4	0.271235	2.56429e-18
Arl5c	0.538561	2.72334e-18
Evl	0.246031	3.30953e-18
Synj1	0.287533	3.44259e-18
Ubl3	0.253691	3.4492e-18
Taf15	0.280647	3.71963e-18
Ptk2b	0.279694	3.72958e-18
Pum1	0.273686	3.76122e-18
Zcchc7	0.274449	4.36816e-18
Gab2	0.210025	4.79705e-18
Cox6c	0.279069	5.34464e-18
Vps13b	0.284865	6.01021e-18
Prpf38b	0.292179	6.26243e-18
Tnrc6a	0.330255	7.08139e-18
Clec2d	0.403102	7.21885e-18
Plcl1	0.256989	8.05197e-18
Usp12	0.347548	8.11938e-18
Dclre1c	0.312968	8.30089e-18
H2-Q7	0.278785	8.30089e-18
Myo9b	0.314727	9.7405e-18
Chmp4b	0.242509	1.09884e-17
Znrf2	0.301423	1.15775e-17
Ctsz	0.223924	1.15799e-17
Sdcbp	0.228347	1.16371e-17
Rsrp1	0.228586	1.32328e-17
AU020206	0.250037	1.46119e-17
Stag1	0.244642	1.7481e-17
Ssh2	0.244163	1.81682e-17
Taok3	0.263549	2.07852e-17
Mark3	0.309654	2.19149e-17
Ep300	0.284247	2.22769e-17
Ahcyl1	0.411	2.34037e-17
Serbp1	0.241507	2.43316e-17
Trim12a	0.314421	2.44865e-17
Atp9b	0.291953	2.51128e-17
Slc15a3	0.294731	3.00232e-17
Tent2	0.302088	3.12066e-17
Asph	0.272071	3.50899e-17
Snx2	0.28974	3.63745e-17
Nmt1	0.222881	3.74897e-17
Psap	0.212204	4.53591e-17
Zbtb20	0.218062	4.69393e-17
Ubl5	0.276342	4.76185e-17
Pik3ap1	0.255233	5.80259e-17
Csde1	0.252371	8.28887e-17
Rnf213	0.366292	1.01161e-16
Nsd3	0.258785	1.18227e-16
Cox8a	0.234533	1.4254e-16
Bbx	0.338256	1.4254e-16
Trim5	0.432226	1.45671e-16
Adap2	0.209374	1.80411e-16
Ddx17	0.286751	2.1914e-16
Adcy7	0.32582	2.25787e-16
Cdk8	0.350265	2.92928e-16
Ambra1	0.251058	2.99514e-16
Plekha1	0.339953	3.47447e-16
Eif3e	0.270632	4.28319e-16
Pign	0.373486	4.39712e-16
Snx24	0.25069	5.09081e-16
Gcnt2	0.351229	6.16424e-16
Srgn	0.267598	6.70385e-16
Mapkapk2	0.287364	6.86478e-16
Csf1	0.466879	7.85651e-16
Thrap3	0.251431	8.63387e-16
Papola	0.243315	8.63387e-16
Cnot2	0.266752	8.6488e-16
Eya4	0.368689	9.95751e-16
Epb41l4aos	0.412167	1.00529e-15
Tlr2	0.33941	1.18972e-15
M6pr	0.290262	1.25983e-15
Nsd1	0.252223	1.31008e-15
Galnt1	0.270475	1.6762e-15
Faf1	0.298301	1.67704e-15
Trim14	0.355887	1.96559e-15
Gpbp1l1	0.349598	2.19374e-15
Apoe	0.51553	2.47169e-15
Tnrc6b	0.230447	2.57435e-15
Mbd5	0.291769	2.57435e-15
Dgkz	0.316761	3.29509e-15
Gng12	0.290922	3.43873e-15
Nampt	0.332278	4.05777e-15
Dtx3l	0.365656	4.65605e-15
Pikfyve	0.422287	4.91211e-15
Zfp992	0.411483	5.00979e-15
Apobec3	0.241448	5.13076e-15
Lysmd4	0.359903	5.41205e-15
Rigi	0.412222	5.96827e-15
Sec61g	0.243978	6.5156e-15
Akap8l	0.278549	7.05455e-15
Eef1b2	0.208706	8.22382e-15
Dync1i2	0.265918	8.43625e-15
Cox7a2	0.264719	9.51988e-15
Hps3	0.336637	1.02092e-14
Cerk	0.228469	1.03362e-14
Dennd6a	0.347931	1.20134e-14
Tapbp	0.255329	1.21243e-14
Vav2	0.337	1.32544e-14
Atp6v1c1	0.251765	1.33012e-14
Xiap	0.274304	1.33055e-14
Gng5	0.217029	1.37031e-14
Relch	0.339793	1.38195e-14
Bcl2a1d	0.40857	1.53675e-14
Egr2	0.408276	1.55603e-14
Tomm7	0.279349	1.90813e-14
Usp15	0.265518	2.02811e-14
Znfx1	0.302436	2.05033e-14
Fndc3a	0.254502	2.21467e-14
Birc6	0.241735	2.22645e-14
Nfe2l2	0.22731	2.22645e-14
Tgoln1	0.277687	2.23044e-14
Ptpn18	0.207733	2.23083e-14
Snd1	0.250973	2.2362e-14
Rbm47	0.241077	2.44368e-14
Gpatch2	0.378432	2.5615e-14
Nedd4l	0.282568	2.65043e-14
Nrbf2	0.315809	2.88989e-14
Sdf4	0.228608	4.20796e-14
Rbm6	0.253723	4.22308e-14
Hivep2	0.360337	4.40906e-14
Atp6v0e	0.217766	4.70572e-14
Mia2	0.260742	5.01184e-14
Ndufa1	0.332423	5.62227e-14
Pet100	0.37948	5.64703e-14
Setd5	0.240736	5.9452e-14
Itgav	0.271665	6.02016e-14
Fndc3b	0.253736	6.02016e-14
Ccl4	0.358126	6.14537e-14
Mrps9	0.378717	6.87064e-14
Stk38l	0.385598	7.80643e-14
Sgpp1	0.438278	7.91134e-14
Usp34	0.245579	9.10285e-14
Fgfr2	0.342438	1.00657e-13
Atp5k	0.306511	1.00657e-13
Mfsd14a	0.35358	1.01172e-13
Arhgap24	0.314305	1.01434e-13
Arfgef1	0.294476	1.08909e-13
Ubn2	0.236293	1.35623e-13
Pak2	0.207979	1.45143e-13
Zfyve26	0.38818	1.61221e-13
Anapc13	0.316794	1.6174e-13
Cdk17	0.303746	1.6508e-13
Tet2	0.269532	1.65944e-13
Tor1aip1	0.204342	1.87663e-13
Romo1	0.316668	1.95503e-13
Stk4	0.263833	2.09687e-13
Dennd1a	0.232771	2.39961e-13
Bola2	0.337248	2.79603e-13
Tm9sf2	0.257127	3.11974e-13
H2-Q6	0.235885	3.81224e-13
Zfp64	0.419287	3.85109e-13
Tnfaip8	0.259738	3.9067e-13
Ythdf3	0.24799	3.9193e-13
Hsd17b11	0.269709	4.03417e-13
Atxn7l1	0.249389	4.18131e-13
Pias2	0.315747	4.20897e-13
Parp12	0.336454	4.32105e-13
Rab8b	0.201981	5.01839e-13
Atp5l	0.226127	5.19038e-13
Zfr	0.230642	5.53523e-13
Sfmbt1	0.258036	5.80755e-13
Tasor	0.320316	5.8412e-13
Mllt10	0.224418	5.93818e-13
Ndufa2	0.245744	6.22021e-13
Vps41	0.287543	6.88566e-13
Ppp1r21	0.284473	7.29263e-13
Acap2	0.207301	7.91562e-13
Ago3	0.254426	8.78391e-13
Atp6v1h	0.320107	8.84343e-13
Cnot3	0.371534	8.93489e-13
Cdk19	0.255187	9.34249e-13
C2cd3	0.359241	9.92032e-13
Stx16	0.280048	1.09347e-12
Crebbp	0.216806	1.38995e-12
Ing4	0.357715	1.55192e-12
Pibf1	0.30821	1.85828e-12
Hnrnpm	0.231897	1.88887e-12
Cyth1	0.354574	1.93308e-12
Snx13	0.266414	1.98087e-12
Cd14	0.293674	2.25065e-12
Cnot4	0.230089	2.29033e-12
Pwwp2a	0.254365	2.34698e-12
Aplp2	0.315634	2.48363e-12
Ash1l	0.21027	2.52572e-12
Ankhd1	0.225532	2.52646e-12
Itpripl2	0.333334	3.14607e-12
Mapk14	0.245423	3.17858e-12
Fcgr2b	0.229963	3.19052e-12
Tbck	0.297895	3.35029e-12
Cop1	0.269214	3.37745e-12
Usp40	0.354376	3.43727e-12
Fam193a	0.237855	3.63351e-12
Ms4a6c	0.352119	3.88633e-12
Zup1	0.279545	4.04342e-12
Slfn8	0.319265	4.16364e-12
Cacna1d	0.236791	4.16632e-12
Aig1	0.270299	4.28741e-12
Aff1	0.252969	4.41814e-12
Tbc1d22a	0.217268	4.48278e-12
Cwf19l2	0.301977	4.56443e-12
Lcp2	0.222156	5.10411e-12
Cd63	0.273208	5.57103e-12
Glyr1	0.267243	5.98083e-12
Cyld	0.267711	6.0133e-12
Sod1	0.32679	6.15471e-12
Ttc39b	0.257984	6.95821e-12
Abhd17c	0.329258	7.02697e-12
Tial1	0.286515	7.41105e-12
Elf2	0.224417	7.66705e-12
Xrn1	0.273405	7.9208e-12
Huwe1	0.236988	7.9719e-12
Trappc8	0.278015	8.16899e-12
Vcpip1	0.335453	8.41675e-12
Arl5a	0.336572	8.97588e-12
Mertk	0.200379	9.32862e-12
Pik3cb	0.270854	9.45707e-12
Kat2b	0.307364	9.81037e-12
Impact	0.262158	9.96746e-12
Ifih1	0.418399	1.12846e-11
Elk3	0.223333	1.19152e-11
Akap10	0.263664	1.21961e-11
Trpm2	0.28666	1.35465e-11
Ext1	0.263497	1.41038e-11
Arl13b	0.370277	1.41977e-11
Tcf20	0.262567	1.46689e-11
Sp140	0.296932	1.51126e-11
Tiam1	0.349162	1.51178e-11
Tnks2	0.229982	1.53506e-11
Ascc3	0.23203	1.57759e-11
Ppp4r3a	0.300514	1.64702e-11
Ankle2	0.305819	1.67194e-11
Pnisr	0.223756	1.70475e-11
Wac	0.228573	1.81198e-11
Cd47	0.213263	1.83684e-11
Map3k1	0.260417	1.84652e-11
Htt	0.273493	1.88372e-11
Cdk12	0.241322	1.89938e-11
Cxcl16	0.315928	2.02029e-11
Cd2ap	0.210749	2.17971e-11
Cpsf6	0.231517	2.4385e-11
Ccnt1	0.259099	2.59491e-11
Prpf4b	0.270445	2.59491e-11
Adam9	0.338169	2.64827e-11
Egr3	0.385007	2.77462e-11
Abca1	0.212066	3.13155e-11
Gnptab	0.35365	3.16555e-11
Ncstn	0.269635	3.2161e-11
Notch2	0.220682	3.31963e-11
Rtcb	0.26065	3.54169e-11
Rel	0.201314	3.62784e-11
Ufsp2	0.308216	3.62784e-11
Zfp106	0.268641	3.69477e-11
Scpep1	0.225608	3.73569e-11
Herc1	0.233943	3.81614e-11
Rab3gap1	0.261536	3.9465e-11
Atp13a2	0.315508	4.33368e-11
Snx10	0.230237	4.36805e-11
Tmx3	0.305319	4.41707e-11
Rbfox1	0.401516	4.51462e-11
Pon3	0.280468	4.51462e-11
Plekhm3	0.257728	4.51462e-11
Plcb2	0.338709	5.02628e-11
Sorl1	0.347588	5.31848e-11
Slc1a3	0.210529	5.38429e-11
Slc36a1	0.311334	5.38429e-11
Frrs1	0.221904	5.44973e-11
Zzz3	0.317894	5.53618e-11
Ube3a	0.235435	5.58405e-11
Ccny	0.279553	5.89554e-11
Fblim1	0.330753	6.2294e-11
Itpkb	0.30435	6.50571e-11
Tnfrsf11a	0.264924	7.91634e-11
Havcr2	0.217376	8.13826e-11
Crebrf	0.246815	8.19761e-11
Cdkal1	0.24668	8.58924e-11
Taok1	0.223473	8.74854e-11
Phip	0.242307	8.75812e-11
Exoc6	0.243284	8.77501e-11
Fam120a	0.273695	8.847e-11
Zfand6	0.207564	8.86726e-11
Ago2	0.262817	9.37151e-11
Ranbp9	0.25777	1.00001e-10
Hspe1	0.20773	1.03238e-10
Cbfb	0.258591	1.0599e-10
Tcf12	0.203507	1.07922e-10
Wrn	0.33552	1.08029e-10
Fars2	0.232613	1.11605e-10
Atp1a1	0.260923	1.11762e-10
Samhd1	0.283546	1.16021e-10
Rnf111	0.248435	1.16926e-10
Washc4	0.241345	1.17721e-10
Hnrnpul1	0.232013	1.19391e-10
Csnk2a1	0.256524	1.23206e-10
Lrrk1	0.201441	1.35798e-10
Zfc3h1	0.275456	1.35876e-10
Gpbp1	0.222109	1.38577e-10
Zfp148	0.214673	1.48723e-10
Bcl2l1	0.231878	1.51712e-10
Eri3	0.267072	1.64965e-10
Wapl	0.20312	1.6536e-10
Cdc73	0.284506	1.68366e-10
Rlf	0.233718	1.727e-10
Ndufb1	0.230051	1.80578e-10
Morc3	0.216417	1.81911e-10
Prcp	0.221788	1.86309e-10
Igbp1	0.258709	1.87298e-10
Pbxip1	0.23635	1.88344e-10
Agps	0.208897	1.97747e-10
Zfp207	0.235164	2.0202e-10
Fcgr4	0.306528	2.14152e-10
Vps35l	0.26422	2.19678e-10
Rufy3	0.26802	2.22471e-10
Ddx3y	0.227209	2.23332e-10
Rsrc1	0.211949	2.23342e-10
Ptafr	0.229376	2.44815e-10
Coq10b	0.224372	2.64034e-10
Tmsb10	0.241064	2.85503e-10
Ptpn12	0.331875	2.94861e-10
Gigyf2	0.270748	2.99519e-10
Fgfr1op2	0.256552	3.00755e-10
Mrps21	0.266236	3.07858e-10
Dnajc1	0.217604	3.1995e-10
Nr4a3	0.461567	3.23549e-10
Zdhhc14	0.232972	3.40283e-10
Cpd	0.322748	3.68983e-10
Nlrc5	0.241552	3.7001e-10
Eps15	0.271105	3.7001e-10
Atad2b	0.233718	4.1417e-10
Plekhf2	0.254585	4.15963e-10
Arglu1	0.209768	4.31233e-10
Fbxl20	0.274788	4.33191e-10
Pcmtd1	0.225043	4.48696e-10
Btk	0.24207	4.48696e-10
Wwp2	0.235608	4.49748e-10
Naa20	0.254724	4.86393e-10
Zcchc2	0.335946	5.03966e-10
Znrf1	0.24822	5.65827e-10
Rgl1	0.235366	5.86785e-10
Tomm6	0.231525	5.95964e-10
Dtnbp1	0.220241	6.12732e-10
Gpatch8	0.205004	6.67155e-10
Uqcr10	0.24885	6.8306e-10
Prpf39	0.284376	7.1642e-10
H2aj	0.285968	7.43085e-10
Stat2	0.284556	7.94769e-10
Caprin1	0.201005	7.98656e-10
Peli2	0.230792	8.50706e-10
Aagab	0.287762	8.60088e-10
Amz1	0.252743	8.82103e-10
Osbpl1a	0.284815	9.01618e-10
Atp5md	0.238647	9.31975e-10
Tlk2	0.292267	9.4812e-10
Rbm22	0.315428	9.55095e-10
Asxl2	0.225524	9.64218e-10
Ilrun	0.237182	1.08259e-09
Ist1	0.297383	1.09332e-09
Raf1	0.287338	1.10333e-09
Mbd2	0.257747	1.121e-09
Med1	0.263061	1.12912e-09
Psme4	0.205744	1.13046e-09
Rabgap1	0.260495	1.26154e-09
Spata13	0.209836	1.27932e-09
Tm9sf4	0.279988	1.31334e-09
Nrd1	0.23261	1.31559e-09
Wdr89	0.303718	1.33882e-09
Mid1	0.344058	1.52986e-09
Ogt	0.229832	1.7255e-09
Sgk3	0.244381	1.88556e-09
Clec7a	0.348521	1.93438e-09
Matr3	0.200364	2.14272e-09
Ppp3cb	0.292805	2.14741e-09
Mier1	0.217164	2.2061e-09
Ecpas	0.220786	2.24583e-09
Mthfsl	0.297495	2.40284e-09
Jarid2	0.257657	2.47671e-09
Chst11	0.282138	2.4986e-09
Med14	0.332139	2.67974e-09
Herc4	0.209873	3.01236e-09
Lcor	0.207559	3.08275e-09
Smurf2	0.218659	3.14793e-09
Ipcef1	0.306344	3.1904e-09
Rbm5	0.2017	3.29877e-09
Mdm2	0.2708	3.36019e-09
Vps13d	0.24033	3.40773e-09
Icosl	0.299937	3.43654e-09
Dars	0.294463	3.48789e-09
Mysm1	0.257358	3.62174e-09
Stx5a	0.251662	3.62492e-09
Mfhas1	0.257498	3.68637e-09
Uggt1	0.293831	4.05358e-09
Uri1	0.302358	4.369e-09
Psmg4	0.297403	4.3764e-09
Optn	0.286206	4.45131e-09
Tmem256	0.251876	4.45336e-09
Cdk13	0.210838	4.66259e-09
Ilf3	0.25229	5.09236e-09
Cnot6l	0.230625	5.29507e-09
Myo5a	0.295525	5.41119e-09
Copg2	0.264706	5.67173e-09
Wdfy4	0.2021	6.31321e-09
Ogdh	0.227151	6.58512e-09
Tle4	0.207729	6.82206e-09
Carmil1	0.368555	7.08098e-09
Colgalt1	0.234755	7.20169e-09
Cdyl	0.292246	7.77678e-09
Tbc1d14	0.209155	7.8786e-09
Slc11a1	0.203635	7.92534e-09
Arhgef7	0.30345	8.07968e-09
Ifi204	0.227071	8.165e-09
Rilpl2	0.229968	8.43469e-09
Cgas	0.32394	8.62776e-09
Bmpr1a	0.229276	9.06092e-09
Arf3	0.235881	9.42377e-09
Zmynd8	0.220361	1.01475e-08
Arhgap25	0.219004	1.04566e-08
Adap2os	0.207097	1.05665e-08
Ppp6r3	0.200983	1.12107e-08
Cnot6	0.234451	1.12906e-08
Os9	0.205235	1.20298e-08
Marchf1	0.208204	1.22902e-08
Vrk2	0.205718	1.26805e-08
Ube2j1	0.20474	1.34842e-08
P2rx4	0.209831	1.44923e-08
Jade2	0.262068	1.47133e-08
Garre1	0.25262	1.50834e-08
Malt1	0.335679	1.54172e-08
Pdk1	0.30311	1.59394e-08
Galk2	0.258623	1.66651e-08
Pigu	0.30069	1.71014e-08
Slc30a9	0.276358	1.77738e-08
Tmem131l	0.248193	1.79535e-08
Rassf2	0.206871	1.85393e-08
Wls	0.214572	1.92358e-08
Zeb1	0.207884	1.95703e-08
Cep350	0.223546	2.01822e-08
Ralgapa1	0.223944	2.03354e-08
Rad51b	0.234922	2.09233e-08
Dcaf8	0.240885	2.09233e-08
Atad1	0.27552	2.10579e-08
Cog5	0.209294	2.21024e-08
Hipk1	0.245593	2.32848e-08
Npnt	0.278325	2.38169e-08
Slc38a6	0.316429	2.44893e-08
Nfyc	0.294957	2.49403e-08
Stat1	0.215744	2.62757e-08
Slc30a7	0.246296	2.75352e-08
Hmbox1	0.24867	2.78057e-08
Ubr3	0.213856	2.91372e-08
Glb1	0.256639	2.91636e-08
Kif13b	0.217224	3.00778e-08
Zfx	0.212639	3.12972e-08
Bhlhe41	0.214415	3.17603e-08
Atp6v1b2	0.218763	3.17987e-08
Ireb2	0.280672	3.182e-08
Ccnl2	0.211029	3.52461e-08
Sfi1	0.297058	3.5582e-08
Casd1	0.267188	3.5582e-08
Sowahc	0.223084	3.96644e-08
Map2k1	0.206625	4.01697e-08
Rc3h2	0.255143	4.09617e-08
Ndufa3	0.221678	4.15246e-08
Akap9	0.205356	4.39613e-08
Cep192	0.280019	4.60714e-08
Tmem68	0.270654	4.71569e-08
Plaur	0.245555	5.48238e-08
Kdm3b	0.226147	5.65164e-08
Efr3a	0.228212	5.68496e-08
R3hdm1	0.217013	5.77584e-08
Nck1	0.256028	5.79132e-08
Ube4a	0.281099	5.81748e-08
Larp4	0.243654	5.91925e-08
Ikbkb	0.226787	5.96248e-08
Upf2	0.253614	6.17476e-08
Mthfs	0.213141	6.34896e-08
Naa38	0.266709	6.40042e-08
Ap1b1	0.239942	6.48921e-08
Gfm2	0.289344	6.6826e-08
Slc25a36	0.219181	6.75122e-08
Snx1	0.233819	6.98812e-08
Rragc	0.211455	7.19104e-08
Spsb1	0.250873	7.52153e-08
Fnip2	0.205154	7.5367e-08
Csf2ra	0.227152	7.55539e-08
Tmf1	0.227607	7.68796e-08
Max	0.229502	8.22954e-08
Klhl24	0.233391	8.2306e-08
Anapc15	0.296663	8.32221e-08
Ralgps1	0.255516	8.75653e-08
Adar	0.257953	9.00037e-08
N4bp1	0.206804	9.01285e-08
Ppp1r2	0.209401	9.04967e-08
Tbc1d8	0.232524	9.04967e-08
Nsf	0.221536	9.59565e-08
Tmem65	0.299686	9.80752e-08
Ttc14	0.203988	9.81496e-08
Dhx15	0.22445	9.81496e-08
Cmc1	0.259925	9.82083e-08
Pcnp	0.221002	1.00865e-07
Rb1	0.207947	1.1292e-07
Itfg1	0.244365	1.15351e-07
Arhgap4	0.248317	1.19453e-07
Wdr7	0.232128	1.24698e-07
Rbm27	0.254017	1.34715e-07
Smarcc2	0.229014	1.37682e-07
Snapc1	0.269377	1.38496e-07
Pik3ca	0.237086	1.5749e-07
Atf7ip	0.212597	1.58346e-07
Ppp2r5a	0.219942	1.59343e-07
Tank	0.216905	1.59593e-07
Ehmt1	0.235342	1.70673e-07
Ddx21	0.229598	1.70679e-07
Tns1	0.215389	1.78118e-07
Tmem87a	0.279421	1.79395e-07
Tmem167	0.218729	1.9152e-07
Mfsd11	0.26063	1.97069e-07
Flnb	0.293268	1.98871e-07
Elk4	0.244345	2.01718e-07
Pank2	0.252329	2.06028e-07
Slc39a1	0.263424	2.07064e-07
Atg10	0.201855	2.0887e-07
Strn	0.282353	2.09461e-07
Cnot1	0.20978	2.68684e-07
Suz12	0.224432	2.71432e-07
Epb41	0.202836	2.74631e-07
Srcap	0.238523	2.79042e-07
Adnp	0.206664	2.84148e-07
Nt5dc3	0.281166	2.84594e-07
Rnf149	0.268382	2.86409e-07
Kcnma1	0.242829	2.89977e-07
Ino80	0.227826	2.90447e-07
Dnajb14	0.220992	2.91079e-07
Slfn2	0.212485	2.93479e-07
Themis2	0.208908	3.01196e-07
Plpp1	0.266626	3.02252e-07
Mib1	0.236193	3.02671e-07
Nup153	0.218683	3.15346e-07
Ppp4r3b	0.221519	3.26264e-07
Yme1l1	0.235581	3.28841e-07
Mtf2	0.270901	3.57203e-07
Sp3	0.22243	3.60538e-07
Ugcg	0.253068	3.88604e-07
Zyg11b	0.22015	4.0566e-07
Kdm5a	0.214544	4.1269e-07
Slfn5	0.306682	4.69631e-07
Spred1	0.202529	4.98616e-07
Gon4l	0.231597	5.17995e-07
Tardbp	0.226123	5.2631e-07
Fnbp4	0.224373	5.54369e-07
Nmi	0.248364	5.81599e-07
Nt5c2	0.201449	5.98992e-07
Plxna4os1	0.266744	6.29531e-07
Mcmbp	0.224863	6.64086e-07
Gbp5	0.322092	6.78579e-07
Bltp2	0.258135	6.8406e-07
Secisbp2l	0.215711	7.36157e-07
Nudt3	0.243271	7.52209e-07
Zc3h12c	0.283577	7.55242e-07
Tnks	0.212216	7.72725e-07
Atf2	0.218407	7.8819e-07
Wdr70	0.238358	7.93189e-07
Myo1e	0.275109	7.98755e-07
Mtmr14	0.254163	8.13463e-07
Ccnt2	0.206737	8.25657e-07
ENSMUSG00000121485	0.239192	8.48765e-07
Tlr13	0.232442	8.57386e-07
Dlg1	0.200416	8.9718e-07
Ccpg1	0.223146	9.10147e-07
Gnpda1	0.253553	9.53489e-07
Memo1	0.208972	9.53525e-07
Dync1li1	0.218883	9.5921e-07
Golga4	0.214674	9.59674e-07
Exoc2	0.229176	9.77685e-07
Ss18	0.213355	1.02035e-06
Nr2c2	0.231823	1.04235e-06
Depdc5	0.246285	1.04488e-06
Ndufc1	0.224895	1.07224e-06
Smg7	0.214961	1.09586e-06
Dido1	0.242944	1.12128e-06
Prpf8	0.239131	1.13883e-06
Cers5	0.253655	1.19591e-06
Slirp	0.239112	1.25567e-06
Prune2	0.251883	1.31833e-06
Clec4a3	0.238643	1.33145e-06
Tifab	0.22083	1.33491e-06
Rnf138	0.23796	1.36285e-06
Mllt3	0.271086	1.3842e-06
Prag1	0.23531	1.39833e-06
Chm	0.241028	1.42836e-06
Rasa1	0.201229	1.42836e-06
Ube4b	0.250539	1.43149e-06
Elovl5	0.284971	1.53426e-06
Gch1	0.290454	1.61394e-06
Ubxn7	0.248654	1.6339e-06
Dennd2b	0.234566	1.74551e-06
Zmym4	0.215365	1.85919e-06
Tnfaip2	0.28669	1.92827e-06
Zc3h13	0.207376	2.0902e-06
Immt	0.200933	2.10941e-06
Immp2l	0.206732	2.1226e-06
Parvg	0.221168	2.15521e-06
Clic4	0.221021	2.30525e-06
Slc37a2	0.217813	2.47953e-06
Kdm3a	0.212037	2.62842e-06
Tlr3	0.234079	2.6525e-06
Otud5	0.231379	2.67025e-06
Pik3c2a	0.212916	2.68261e-06
Ly96	0.23454	2.78289e-06
Aebp2	0.237631	2.80457e-06
Vps13a	0.222529	3.00523e-06
Cln3	0.210942	3.1825e-06
Slc31a2	0.230991	3.39519e-06
Knop1	0.218593	3.39843e-06
Tor3a	0.20747	3.43302e-06
Trmt1l	0.232943	3.45167e-06
Usp36	0.231139	3.52953e-06
Nup214	0.216677	3.54452e-06
Zmym2	0.206597	3.97666e-06
Ankrd13c	0.248147	4.07965e-06
Ppp2r5e	0.209068	4.34945e-06
Zfp182	0.237326	4.40718e-06
Hnrnpll	0.236148	4.46635e-06
Usp37	0.239189	4.64095e-06
Enox2	0.237529	4.6833e-06
Nap1l1	0.202522	4.6833e-06
Tasor2	0.213594	5.12623e-06
Ddx10	0.228147	5.13594e-06
Pi4k2a	0.206255	5.20515e-06
Odf2	0.238233	5.20519e-06
Mpp7	0.238779	5.52123e-06
Manba	0.237201	5.78832e-06
Ets2	0.205749	5.81708e-06
Tmpo	0.216285	5.91509e-06
Mast4	0.240868	5.92115e-06
Jak2	0.233837	6.18987e-06
Kif3b	0.242454	6.27969e-06
Parp1	0.23128	6.49528e-06
Tmem245	0.203916	6.85569e-06
Suco	0.207765	7.01227e-06
Pggt1b	0.230224	7.08262e-06
Ext2	0.240698	7.41546e-06
Mms19	0.200121	7.50468e-06
Tomm70a	0.220789	7.57536e-06
Traf3ip3	0.220163	8.19657e-06
Stip1	0.219171	8.71705e-06
Pkib	0.22152	8.98832e-06
Acbd5	0.220546	9.00463e-06
AW112010	0.246569	9.00463e-06
Dhx36	0.220343	9.06116e-06
Naaa	0.237932	9.07346e-06
Leng8	0.21303	9.38642e-06
Hivep1	0.202022	9.57347e-06
Cdkn1a	0.288801	9.58561e-06
Lemd3	0.221662	9.61696e-06
Galnt10	0.228337	1.01257e-05
Actn4	0.213534	1.01587e-05
Tal1	0.226525	1.13922e-05
Il15	0.244351	1.16271e-05
Cass4	0.223169	1.18324e-05
Micu2	0.221043	1.21183e-05
Akap7	0.254209	1.23766e-05
Specc1l	0.222791	1.26208e-05
Api5	0.21021	1.30371e-05
Usp38	0.232188	1.31537e-05
Ust	0.233561	1.35236e-05
Rbm33	0.208664	1.38528e-05
Cln5	0.221935	1.42035e-05
Itpk1	0.216886	1.50228e-05
Anxa5	0.236313	1.50378e-05
Zbtb1	0.220537	1.54318e-05
Erap1	0.215791	1.60139e-05
AU040320	0.222575	1.60496e-05
Senp5	0.223287	1.62936e-05
Virma	0.220603	1.67603e-05
Tep1	0.208851	1.67754e-05
Minpp1	0.213294	1.69871e-05
Slx4ip	0.221875	1.72548e-05
Nsrp1	0.206138	1.75341e-05
Rpn1	0.206173	1.80212e-05
Rictor	0.202644	1.82695e-05
Eapp	0.208118	1.8306e-05
Ylpm1	0.206147	1.86535e-05
Nbas	0.221071	1.96265e-05
Tmem87b	0.208427	1.99617e-05
Lrrfip2	0.210188	2.01917e-05
Bcap29	0.204497	2.22877e-05
Brd8	0.222787	2.29702e-05
Polr2f	0.206833	2.38223e-05
Hypk	0.213365	2.40918e-05
Dapk1	0.226973	2.49112e-05
Zfp451	0.22723	2.52185e-05
Rnf20	0.218499	2.55532e-05
B4galt6	0.211238	2.57026e-05
Foxj2	0.223328	2.66641e-05
Ifi207	0.230872	2.70779e-05
Nek9	0.213144	3.03755e-05
Clasp1	0.205618	3.18077e-05
Ctnna1	0.208515	3.42017e-05
Ago1	0.207413	3.47801e-05
Nagk	0.216706	3.51524e-05
Cpsf3	0.202006	3.58374e-05
Cd274	0.21094	3.59274e-05
Strbp	0.238643	3.68507e-05
Zfyve1	0.219422	3.87092e-05
Dpy19l1	0.221161	4.14169e-05
Sin3a	0.211098	4.17649e-05
Btrc	0.211398	4.17687e-05
Washc3	0.210758	4.21476e-05
Pphln1	0.205426	4.45029e-05
Mbtps2	0.217678	4.53553e-05
Dglucy	0.207981	4.69855e-05
Umad1	0.216957	4.70642e-05
Stim2	0.218008	5.32478e-05
Dcun1d1	0.201985	5.63761e-05
Fam76b	0.202956	5.84882e-05
Cers6	0.229354	5.84882e-05
Sos1	0.215233	6.5154e-05
Etv1	0.23011	6.84096e-05
Ctdspl2	0.213084	7.24667e-05
Dhdds	0.213249	7.33411e-05
Cblb	0.222567	7.37515e-05
Metap1d	0.226169	7.52038e-05
Abcb7	0.215287	7.59775e-05
Tlr4	0.210855	8.2496e-05
Opa1	0.201085	8.87118e-05
Abcg2	0.208199	0.000106855
Lifr	0.222845	0.000141548
Lats1	0.200693	0.000149763
Stam2	0.20399	0.000156531
Gadd45b	0.207076	0.000199456
Dnajc24	0.20446	0.00020465
Prdm1	0.215397	0.000221366
Pogz	0.207787	0.000249463
Srek1ip1	0.203778	0.000289964
Kat6b	0.200075	0.000463578
Myo1b	0.203091	0.000816315
Usp18	0.20581	0.00118881
Ccl2	0.234651	0.00204702
Ddhd1	0.203465	0.00291114
Ccl5	0.205984	0.0224201

## Sheet: Supplementary Table 5
Supplementary Table 5. Supplementary Table 2. List of DEGs up and down regulated in control diet (CT_egfp vs CT_VIVIT) for males (from Figure 4C)
Vivit up			Vivit down
Gene	logFC	FDR	Gene	logFC	FDR
Cx3cr1	0.376831	5.88752e-102	Psmb8	-1.14602	2.2203e-241
Gpr34	0.58982	1.04344e-98	H2-K1	-1.09799	1.15628e-234
Maf	0.623022	2.52956e-96	H2-DMb1	-1.27453	1.08969e-229
Scoc	0.550336	8.02787e-88	H2-DMa	-1.11721	1.683e-224
Nav3	0.58504	9.58934e-75	H2-Oa	-1.58503	8.32845e-206
Igkc	1.00518	9.52244e-64	Ctss	-0.625724	1.36939e-195
Qki	0.348715	7.84433e-57	H2-D1	-0.947196	1.20226e-182
Cd164	0.504708	1.50174e-54	Fth1	-0.814524	9.69602e-172
Ttr	0.471241	9.38925e-53	B2m	-0.756164	3.18298e-170
Ivns1abp	0.443103	2.48582e-52	C1qa	-0.633759	3.11934e-166
H2bc4	0.795961	3.49832e-52	AW112010	-1.55514	4.92648e-162
Fchsd2	0.450714	2.13745e-51	Prdx5	-0.942974	7.37166e-152
Elmo1	0.344377	2.23272e-50	Itm2b	-0.522374	2.57826e-146
Jund	0.444313	1.16416e-48	Psap	-0.633075	8.82851e-143
Plxdc2	0.347814	1.24729e-48	Psme1	-0.883361	8.82851e-143
Marcks	0.237469	1.40628e-48	Psme2	-1.01393	9.72732e-143
Nfia	0.442444	3.09161e-48	H2-T23	-0.854011	2.22431e-140
Mir99ahg	0.374358	8.13585e-45	Cd52	-1.0214	4.82031e-139
Mbnl1	0.346345	8.45832e-44	Psmb10	-0.976273	2.32563e-131
Numb	0.39819	2.48268e-43	Ly6e	-0.631102	4.12186e-129
Csmd3	0.486829	2.64961e-43	Psmb9	-0.909502	1.9445e-124
Cd53	0.286419	2.65697e-42	C1qc	-0.44346	1.86784e-123
Pde3b	0.364457	2.65697e-42	Lap3	-0.88478	3.02712e-123
Ltc4s	0.401166	3.63985e-40	Ctsc	-0.846658	7.93387e-123
Zfand5	0.432702	6.94985e-40	Eef1a1	-0.566441	4.90679e-122
Golm1	0.381435	1.48162e-39	Tspo	-1.04789	7.44402e-120
Srgap2	0.315583	6.4054e-39	Cd74	-1.67706	9.09473e-119
Cfh	0.380943	2.97079e-38	Plaat3	-1.24646	7.56038e-118
Lysmd4	0.584941	2.97079e-38	H2-Ab1	-1.53559	2.17492e-114
Txnip	0.396202	2.32391e-34	Aif1	-0.61585	3.49143e-113
Egr1	0.434714	3.14687e-34	Ctsb	-0.615322	3.4976e-112
Rhob	0.349346	5.90202e-34	Gapdh	-0.66219	3.12822e-110
Dusp6	0.432768	4.42219e-32	Fcer1g	-0.486397	6.16572e-110
Agmo	0.375959	4.84656e-32	Pkm	-0.922805	8.07863e-110
Uba52	0.342538	4.92727e-32	Hspa8	-0.567219	5.2435e-108
Jun	0.443796	6.06692e-32	Pdia3	-0.602079	1.1079e-105
Tmem135	0.352982	7.49918e-32	Igtp	-1.27827	3.08142e-105
H1f2	0.542679	1.39877e-31	Stat1	-1.04413	6.39559e-104
Tmx4	0.59878	7.59332e-31	Btf3	-0.605812	1.61771e-103
Arglu1	0.371019	3.70646e-30	Samhd1	-1.03586	4.85521e-103
Ptpro	0.467141	4.83352e-29	Lyz2	-0.923654	1.15356e-102
Arrdc3	0.620755	1.27913e-28	Tap1	-1.00351	1.16249e-102
Chd9	0.269779	1.32283e-28	Npc2	-0.588169	3.06618e-102
Phf14	0.3648	5.31642e-28	Cox5a	-0.809059	1.25126e-99
Vsir	0.251496	6.2212e-28	Gbp7	-1.09695	3.54083e-99
Hpgds	0.244592	2.25104e-27	Lgals3bp	-0.84824	1.00911e-98
Med12l	0.464966	3.00007e-27	Tmbim6	-0.484627	2.70141e-98
Cst3	0.264301	1.03808e-26	Aldoa	-0.790416	4.08817e-97
Tanc2	0.226357	1.92835e-26	Cd86	-0.737809	1.85034e-96
Kctd12	0.335975	3.59534e-26	Txn1	-1.05688	3.36621e-96
Fosb	0.39384	8.44451e-26	Cxcl16	-1.04211	1.68065e-93
Siglech	0.269492	1.11863e-25	H2-T22	-0.976108	2.90815e-92
Zfhx3	0.231253	1.41068e-25	Etv6	-0.578446	7.67079e-92
Abca9	0.364561	1.49877e-25	Ctsh	-0.480387	9.71601e-92
Sall1	0.301784	1.26177e-24	Cyba	-0.536601	1.07088e-91
Plcl2	0.286335	1.56189e-24	Npm1	-0.622338	1.23882e-91
Pwwp2a	0.361333	1.73176e-24	Ctsz	-0.522635	2.73961e-91
Tjp1	0.334078	6.419e-24	Nfe2l2	-0.603616	1.0367e-90
Rapgef5	0.285638	9.2567e-24	Selenow	-0.961627	1.20006e-90
Hnrnph1	0.381263	1.81214e-23	Irgm1	-1.09324	2.60773e-90
Dock10	0.264495	2.49415e-23	Nme2	-0.657506	5.02629e-90
Klf4	0.516009	4.98736e-23	C1qb	-0.409178	5.84604e-90
Nptn	0.282015	6.03814e-23	H2-Aa	-1.41348	1.66784e-89
Mtdh	0.210467	6.796e-23	Tpt1	-0.453422	3.65414e-86
Fli1	0.243814	1.48679e-22	Lrmda	-0.555961	1.03502e-85
Slc4a7	0.391014	1.69106e-22	Itpkb	-0.965829	1.50757e-84
Apbb1ip	0.24836	1.95348e-22	Cd81	-0.387028	4.23692e-84
Cltc	0.271254	3.05561e-22	H2-Eb1	-1.31244	7.40491e-84
Lrba	0.392016	3.90366e-22	Gabarap	-0.517206	3.10492e-82
Swap70	0.413959	7.5155e-22	Rplp0	-0.483346	7.97153e-82
Hpgd	0.387724	1.42631e-21	Naca	-0.50949	1.00906e-81
Ccl6	0.422997	1.53252e-21	Ly6a	-1.31346	3.56813e-81
Slmap	0.335478	1.64305e-21	Bst2	-0.773702	8.11576e-80
Ppcdc	0.352448	1.64305e-21	Akr1a1	-0.559156	7.61352e-78
Fcrls	0.339017	1.80339e-21	Gpi1	-0.738585	1.00365e-77
Calm2	0.203941	3.21743e-21	Gbp2	-1.38968	3.47022e-77
Arsb	0.348538	4.9267e-21	Il18bp	-1.46932	9.43476e-76
Zfp36l1	0.313389	1.30602e-20	Tpi1	-0.943749	5.47828e-75
Epc2	0.420167	2.01003e-20	Slc11a1	-0.696324	6.77129e-75
Itgam	0.230312	2.6513e-20	Ifi30	-0.732308	1.84909e-73
Inpp4b	0.269616	3.75162e-20	Rtraf	-0.635482	3.74886e-73
Atf3	0.306039	4.25502e-20	Hsp90ab1	-0.473908	3.92563e-73
Zfp36	0.268813	5.08402e-20	Tapbp	-0.635683	5.33294e-73
Pip4k2a	0.232173	5.902e-20	Pomp	-0.542308	1.28822e-72
Ywhaz	0.254849	6.85046e-20	Tap2	-0.744451	3.51571e-72
Wsb1	0.275969	1.28963e-19	Arpc1b	-0.43993	4.54436e-71
Arhgap5	0.237531	1.41797e-19	Sat1	-0.493857	7.9294e-70
Akirin2	0.301299	1.52381e-19	H2-Q4	-0.604054	1.75994e-68
Gnas	0.263704	2.19493e-19	Lamp1	-0.405181	2.38755e-66
Pmepa1	0.221847	2.33662e-19	Fgl2	-0.922206	6.18603e-66
Tnfaip3	0.329435	2.4941e-19	Arid5b	-0.760597	3.45439e-65
Adap2os	0.314901	5.41415e-19	Eef1b2	-0.459686	6.38329e-65
Ecscr	0.320542	5.8003e-19	Ybx1	-0.53414	1.48512e-64
Cysltr1	0.405801	7.63107e-19	Myl12b	-0.477945	3.93297e-64
Ier3	0.375694	8.50456e-19	Pabpc1	-0.468181	7.33441e-64
Camk2n1	0.349491	1.71892e-18	Rtcb	-0.703715	7.64893e-63
Stag1	0.249535	3.53598e-18	Akr1b3	-0.715872	3.66582e-62
Peak1	0.39203	4.92926e-18	Mif	-0.786083	3.22043e-61
Strbp	0.483215	7.8772e-18	Slamf8	-1.01976	7.83443e-60
Irf2bpl	0.320407	9.64935e-18	Slc25a3	-0.454579	1.47958e-59
Spacdr	0.228459	1.12818e-17	Selenof	-0.468354	2.34103e-59
Rgs3	0.464846	1.3348e-17	Eif3f	-0.482233	1.02009e-58
Clip1	0.263775	3.54695e-17	Fcgr1	-0.473181	2.73839e-57
Maml3	0.242984	3.98735e-17	Srgn	-0.536215	6.27317e-57
Rasal2	0.35994	4.89052e-17	Eef2	-0.407101	7.9984e-57
Erbin	0.247391	5.96597e-17	Chd7	-0.452385	1.277e-56
P2ry13	0.248221	8.27297e-17	Apobec3	-0.530611	6.40418e-56
Hmgb1	0.20942	1.02391e-16	Ccl5	-1.56445	2.68274e-55
Rnase4	0.235777	1.53065e-16	Lrpap1	-0.631499	8.82008e-54
Errfi1	0.491995	2.00295e-16	Hspe1	-0.520222	9.56307e-54
Ulk2	0.288322	2.74377e-16	Pfdn5	-0.415766	9.62916e-54
Dnajb4	0.407506	6.33667e-16	Apoe	-1.04068	1.00784e-53
Ddx3x	0.284543	6.8093e-16	Csf2rb	-0.738032	1.03206e-53
Jmjd1c	0.202078	7.08051e-16	Pgk1	-0.793752	1.42258e-53
Ets1	0.381516	8.88347e-16	Psma5	-0.665906	1.53115e-53
Ogt	0.302301	1.02996e-15	Grn	-0.369144	3.24393e-53
Slc12a6	0.246744	1.9277e-15	Fcgr3	-0.332587	4.63895e-53
Memo1	0.330024	3.26336e-15	Uqcrb	-0.574647	9.17846e-53
Atp13a3	0.304478	4.63968e-15	Cst7	-1.15103	1.38681e-52
Magi1	0.244596	4.72755e-15	Ucp2	-0.402467	1.48441e-52
Dusp3	0.348605	5.34151e-15	Ptpn6	-0.459274	6.7901e-52
Ccng2	0.370025	5.43496e-15	Marchf5	-0.658401	8.47587e-52
Edem1	0.254054	5.61396e-15	Slc1a3	-0.495204	1.68809e-51
Clk1	0.218586	5.93141e-15	Mpeg1	-0.417918	1.11711e-50
Zfp652	0.255056	6.09673e-15	Pik3ap1	-0.463013	1.3839e-50
Atf7ip	0.307542	6.38381e-15	Atp6v0c	-0.3853	1.72551e-50
Slc12a2	0.360964	8.42553e-15	Prdx1	-0.533608	2.85552e-50
Samsn1	0.249614	8.79729e-15	Atp5pb	-0.485209	3.44047e-50
Adam10	0.230818	1.10259e-14	Ddhd1	-1.06258	3.58233e-50
Oxr1	0.283112	1.90996e-14	Tbca	-0.5273	4.41058e-50
Hhex	0.346577	2.01445e-14	Rbm3	-0.458688	2.51033e-49
Rybp	0.330264	2.06589e-14	Tbc1d8	-0.723649	3.35161e-49
Chsy1	0.361617	2.32919e-14	Sp140	-0.710897	3.67928e-49
Mylip	0.219265	2.76371e-14	Psma2	-0.577204	6.48497e-49
Slc40a1	0.365865	4.84804e-14	Shisa5	-0.566752	7.06319e-49
Fam91a1	0.267782	5.31935e-14	Tnfsf13b	-0.750233	1.5663e-48
Tacc1	0.203878	5.52754e-14	Trafd1	-0.537471	2.3596e-48
Pard3b	0.30961	7.12564e-14	Ak2	-0.679493	2.44528e-48
C5ar2	0.407189	7.43129e-14	Spint1	-0.609703	3.14304e-48
Mctp1	0.268785	8.99176e-14	Nampt	-0.703225	3.70726e-48
Wdr44	0.297794	1.00347e-13	Ptk2b	-0.504436	5.00842e-48
Creb1	0.301618	1.39319e-13	Rbfox1	-0.937893	8.928e-48
Junb	0.228583	1.55754e-13	Atp5g2	-0.411359	1.63891e-47
Prkn	0.256472	1.82784e-13	Bri3	-0.374088	5.4209e-47
Fos	0.252051	1.88106e-13	Sdf4	-0.463931	6.27163e-47
Il6st	0.253956	1.9817e-13	Ndufs3	-0.569265	8.34123e-47
Klhl9	0.376671	2.12756e-13	Vdac2	-0.394635	8.72042e-47
Bhlhe41	0.274072	3.47453e-13	Ccl12	-0.892835	1.06955e-46
Fhit	0.296598	3.68844e-13	Hebp1	-0.650917	3.61595e-46
Bmpr2	0.268971	4.23209e-13	Tmem106a	-0.847148	7.61489e-46
Stab1	0.322211	6.08071e-13	Taldo1	-0.472572	9.94308e-46
Pik3cg	0.274611	7.58782e-13	Arpc3	-0.378082	2.42664e-45
Eif4g2	0.227042	1.04967e-12	Eif3h	-0.443325	2.78918e-45
Gabpb1	0.347264	1.20822e-12	Sh3bgrl3	-0.388082	2.8626e-45
Ctnnd1	0.277039	1.25966e-12	Efhd2	-0.323751	3.14279e-45
Nbea	0.335377	1.25966e-12	Cryba4	-0.623998	6.44497e-45
Cask	0.275538	1.95128e-12	Pgam1	-0.588089	6.7101e-45
Ints6l	0.269675	2.69011e-12	Psmb2	-0.504779	7.33587e-45
Atf4	0.271386	2.80024e-12	Dclre1c	-0.57513	1.15191e-44
Rbm26	0.219855	3.11481e-12	Atp6v1g1	-0.394234	1.81403e-44
Tra2b	0.206292	3.24158e-12	Eif5a	-0.47269	1.88276e-44
Gpr183	0.276083	3.31168e-12	Cd63	-0.554729	4.70137e-44
Sipa1l1	0.269382	3.33387e-12	Arhgdib	-0.415916	7.13478e-44
Klf12	0.264571	3.77734e-12	Cfl1	-0.311839	7.75228e-44
Ppp1r10	0.288056	4.89694e-12	Ldha	-0.563095	4.18715e-43
Azin1	0.255184	4.97394e-12	Rnf213	-0.73171	7.14536e-43
Kat6a	0.238217	5.73148e-12	Fcgrt	-0.578454	8.94313e-43
Sft2d2	0.314061	6.46449e-12	Slc25a5	-0.374038	2.65697e-42
Nck1	0.317309	6.78142e-12	Gatm	-0.546207	2.75861e-42
Kmt2c	0.21971	7.30881e-12	Vamp8	-0.407359	2.84873e-42
Prkce	0.280407	7.66337e-12	Cstb	-0.693024	3.21721e-42
Prpf4b	0.278407	8.68083e-12	Irf8	-0.361366	4.34891e-42
Tuba1a	0.311688	8.8206e-12	Itm2c	-0.348187	5.68391e-42
Exoc6b	0.252031	9.02404e-12	Calr	-0.392991	6.68482e-42
Ipo11	0.376544	1.1216e-11	Atp5h	-0.43719	7.0114e-42
Mlxipl	0.346603	1.13613e-11	Hk3	-0.643972	1.73048e-41
Nos1ap	0.336165	1.16596e-11	Parp9	-0.60949	2.08207e-41
Mt1	0.296562	1.21998e-11	Anxa5	-0.765209	2.67423e-41
Slc2a5	0.260567	1.38842e-11	Cmip	-0.382654	3.61902e-41
Gpr155	0.334178	1.41535e-11	Pycard	-0.389921	4.58889e-41
Vis1	0.287834	1.78938e-11	Il2rg	-0.975313	4.58889e-41
Celf1	0.206243	2.8069e-11	Clic1	-0.285349	5.12589e-41
Arhgap12	0.242896	3.1611e-11	Tns3	-0.39087	8.46514e-41
H2-K2	0.339425	3.23995e-11	Pld4	-0.305686	1.23576e-40
Usp24	0.260726	3.39162e-11	Slc3a2	-0.390511	1.83127e-40
Rab31	0.216841	3.39162e-11	Lgmn	-0.214125	1.90576e-40
Tlr7	0.235212	3.4481e-11	Ifnar2	-0.362161	5.55838e-40
Tut4	0.243337	3.55789e-11	Atp5c1	-0.43636	1.15735e-39
Tspan4	0.28581	3.89568e-11	Chchd2	-0.364344	1.19186e-39
Pum2	0.208562	4.57095e-11	Cpq	-0.634961	2.17022e-39
Pid1	0.217471	5.00016e-11	Atp5mpl	-0.495902	2.44215e-39
Ppp1r9a	0.207038	5.34801e-11	Sp110	-0.566663	3.93694e-39
Kdm3b	0.270825	5.89999e-11	Sub1	-0.384979	8.22605e-39
Sec63	0.252089	6.58129e-11	Slc31a2	-0.674761	1.51424e-38
P3h2	0.219969	9.02238e-11	Nlrc5	-0.675078	1.71758e-38
Ep300	0.221715	9.22728e-11	Limd2	-0.382637	1.77972e-38
Kdm5b	0.362686	9.5387e-11	Cd180	-0.466941	1.81841e-38
Mtmr12	0.283943	1.44944e-10	Eif3k	-0.439912	2.88531e-38
Abhd6	0.276929	1.53959e-10	Cebpb	-0.408331	2.90665e-38
Itga6	0.241342	2.03461e-10	Slc25a4	-0.456544	3.0376e-38
Plxna4	0.226407	2.08505e-10	Aff1	-0.503142	4.32278e-38
Cryl1	0.25691	2.85793e-10	Hspa5	-0.373656	4.7705e-38
Slc24a3	0.249397	2.90399e-10	Rad51b	-0.620537	6.80398e-38
Dusp16	0.221507	3.15588e-10	Timp2	-0.402952	9.29084e-38
Tspan7	0.246331	3.38826e-10	Entpd1	-0.386426	1.24996e-37
Filip1l	0.297266	3.47125e-10	Tubb5	-0.393549	1.42699e-37
Ddit3	0.297633	3.9761e-10	Tpd52	-0.483598	1.58447e-37
Casp4	0.228842	4.48968e-10	Ogfr	-0.616554	1.85513e-37
Rgl2	0.324035	5.22368e-10	Gdi2	-0.306282	2.3812e-37
Atxn1	0.252458	5.77481e-10	Ly86	-0.314415	2.40398e-37
Evi5	0.261741	6.22204e-10	H2-Q7	-0.533735	2.44923e-37
Zmym2	0.270332	6.84505e-10	Ell2	-0.695928	2.67951e-37
Pcf11	0.253183	7.2877e-10	Creg1	-0.356103	3.25478e-37
Alkbh5	0.304614	7.29036e-10	Naaa	-0.712656	1.92028e-36
Pmp22	0.205909	7.91238e-10	Dnaja2	-0.456116	4.73425e-36
Mtss1	0.303688	7.91238e-10	Laptm4a	-0.297954	4.99964e-36
Nr2c2	0.286218	8.62433e-10	AU020206	-0.396053	2.09184e-35
Mapk8	0.327244	1.24636e-09	Polr1d	-0.438831	2.40979e-35
Kdm6a	0.286571	1.6872e-09	Zbp1	-0.855862	2.97839e-35
Heca	0.246158	1.97841e-09	Fis1	-0.456059	4.04949e-35
Itgb1	0.201577	2.31194e-09	Ssr4	-0.351144	5.64071e-35
Nlk	0.246066	2.42531e-09	Pold4	-0.443611	8.09303e-35
Rab6b	0.278886	2.62146e-09	Sh3glb1	-0.264916	1.00739e-34
Kbtbd2	0.27898	2.7998e-09	Stxbp3	-0.514495	1.04271e-34
Insr	0.261348	2.84931e-09	Ifi35	-0.569553	1.1885e-34
Acvr1	0.261582	3.0222e-09	Uqcrh	-0.363179	1.1885e-34
Khdrbs3	0.301555	3.09547e-09	Kpna4	-0.410142	1.54875e-34
Hp1bp3	0.239449	3.45553e-09	Fcgr2b	-0.423732	2.66209e-34
Tle4	0.213321	3.49962e-09	Edf1	-0.417684	2.86607e-34
Wwp1	0.31142	3.61686e-09	Rab5c	-0.435953	3.25841e-34
Mid1ip1	0.271845	3.66402e-09	Traf3	-0.500006	4.41447e-34
Stxbp5	0.246365	3.90099e-09	Esd	-0.519092	6.10984e-34
Pdzd8	0.313344	4.53959e-09	Serf2	-0.330237	9.00648e-34
Pbx3	0.290547	5.15925e-09	Gna13	-0.382697	1.10664e-33
Lpar6	0.267839	5.77709e-09	Ppm1h	-0.351556	1.25026e-33
Eya4	0.279623	6.18677e-09	Tspan3	-0.462782	1.30265e-33
Far1	0.250842	6.21336e-09	Rack1	-0.309631	2.15003e-33
Tug1	0.301939	6.32899e-09	Hpcal1	-0.566906	4.1369e-33
Nuak1	0.236343	6.64761e-09	Epsti1	-0.418277	4.25103e-33
Rnf2	0.214987	6.68571e-09	Atp5b	-0.37195	7.66764e-33
Ube2e3	0.247675	7.2098e-09	M6pr	-0.463732	8.01144e-33
Msrb2	0.303299	8.2032e-09	Rnh1	-0.444605	9.93449e-33
Bank1	0.291295	8.34879e-09	Gsap	-0.445705	1.4449e-32
Cdk19	0.206613	8.78885e-09	Grina	-0.412211	1.79623e-32
Abcd2	0.256298	8.9893e-09	Tent5c	-0.420057	1.90113e-32
Zfp691	0.304321	9.4529e-09	Trim25	-0.719447	2.59412e-32
Tbpl1	0.255128	9.64259e-09	Rassf3	-0.457156	2.88307e-32
Tcf20	0.226416	1.01138e-08	Itgb2	-0.383238	3.78055e-32
Chd4	0.211623	1.06476e-08	Hspd1	-0.521571	3.91107e-32
Sgk1	0.231196	1.07046e-08	Cct4	-0.444707	5.8871e-32
Liph	0.293252	1.13481e-08	Cox6b1	-0.390327	7.90446e-32
Creb3l2	0.286184	1.16176e-08	Lrrc8d	-0.398818	8.20428e-32
Fam76b	0.279278	1.47088e-08	Lpcat2	-0.224326	8.30718e-32
Klf7	0.229475	1.69393e-08	Coro7	-0.623459	8.52464e-32
Tmem64	0.3048	1.75854e-08	Cox8a	-0.334736	9.6605e-32
Arhgef40	0.299308	1.91748e-08	Adgre1	-0.356156	1.24579e-31
Clcn5	0.308595	2.17572e-08	Sdhb	-0.442302	1.28163e-31
Exoc5	0.225836	2.17572e-08	Wipf1	-0.444083	1.47961e-31
Sox4	0.276831	2.2222e-08	Pxn	-0.455111	2.44425e-31
Ube2g1	0.236705	2.33314e-08	Clec5a	-0.507981	2.87284e-31
Tfe3	0.221936	2.40256e-08	Dgkz	-0.503489	2.92555e-31
Xiap	0.203139	2.4366e-08	Med28	-0.494469	3.02051e-31
Nr1d2	0.284023	2.44437e-08	Txnl1	-0.474036	3.75402e-31
Hook3	0.211	2.47248e-08	Atp5j	-0.395326	4.80874e-31
Zmym4	0.246135	3.14744e-08	Rfc2	-0.563023	5.72528e-31
Arhgef6	0.232441	3.38136e-08	Ndufb9	-0.412738	6.66234e-31
Med13	0.208907	4.14683e-08	Erp29	-0.276645	1.02832e-30
Snhg8	0.227031	5.02073e-08	Rasa4	-0.47515	1.24461e-30
Pdcd4	0.253121	5.6449e-08	Psma7	-0.408327	1.27183e-30
Gab1	0.25849	6.15991e-08	Gsdmd	-0.473422	1.741e-30
Map3k5	0.206904	6.73658e-08	Fyb	-0.298841	2.13365e-30
Tasor	0.244589	6.74562e-08	Irak2	-0.319659	2.55841e-30
Sp1	0.258563	6.8181e-08	Fmnl2	-0.50568	2.60169e-30
Gtf2a1	0.241586	6.91274e-08	P2rx4	-0.455802	3.5972e-30
Sypl	0.222441	6.96656e-08	Got1	-0.594684	3.67476e-30
Nfkbiz	0.219006	7.20678e-08	Bsg	-0.309692	3.98608e-30
Ahcyl2	0.257768	7.91624e-08	Clta	-0.241307	5.75965e-30
Socs6	0.286003	8.82125e-08	Sipa1l2	-0.365077	6.06817e-30
Gfm2	0.284171	9.12432e-08	Tpst2	-0.339367	8.69081e-30
Fbxl3	0.248133	1.1134e-07	Cep120	-0.572294	9.94769e-30
Fer	0.236281	1.14782e-07	Rab11a	-0.358556	1.027e-29
Spred1	0.211062	1.15178e-07	Gpx1	-0.33958	1.04909e-29
Gls	0.202072	1.34858e-07	Ube2l3	-0.396481	1.4065e-29
Macir	0.281736	1.37564e-07	Atp6v1f	-0.366203	1.64795e-29
Aebp2	0.267694	1.39562e-07	Carmil1	-0.858504	1.80427e-29
Kpna3	0.201903	1.40236e-07	Gde1	-0.476231	2.02871e-29
Msl2	0.250665	1.54514e-07	Gfpt1	-0.551219	2.31207e-29
Slc44a2	0.248047	1.56493e-07	Psma6	-0.477003	2.58001e-29
Npl	0.246111	2.1921e-07	Psma3	-0.374238	3.32438e-29
Klhl24	0.223045	2.26651e-07	Tuba1b	-0.331846	5.57003e-29
Gigyf2	0.226067	2.31727e-07	Znfx1	-0.484899	6.05658e-29
Ralgps2	0.251404	2.32464e-07	Uvrag	-0.322667	6.69596e-29
Rnf38	0.222945	4.55705e-07	Ddx24	-0.401282	8.74564e-29
Tnf	0.280793	4.56573e-07	Lag3	-0.31098	1.87074e-28
Arap3	0.254435	4.61e-07	Gars	-0.579582	1.96756e-28
Ap1s2	0.262129	4.66982e-07	Daam1	-0.49075	3.36524e-28
Dip2c	0.224192	5.22416e-07	Glmp	-0.424142	3.99289e-28
Nfam1	0.215712	5.50939e-07	Tmbim4	-0.390693	4.09345e-28
Gas6	0.235407	6.09752e-07	Coa5	-0.589459	4.71675e-28
Trim33	0.240759	6.09906e-07	Rbm47	-0.358992	6.52526e-28
Top2b	0.24734	6.15513e-07	C1qbp	-0.485245	7.10776e-28
Dhx15	0.213938	6.267e-07	Eif3m	-0.429444	7.93493e-28
Ppp1r15a	0.201641	6.40794e-07	Ccdc86	-0.572925	8.34346e-28
Cln8	0.237454	6.69014e-07	Ptpn1	-0.322104	1.14454e-27
Fam133b	0.250479	6.8733e-07	Tgm2	-0.556452	1.18366e-27
Rfx3	0.24874	7.01529e-07	Ppfia4	-0.324985	1.62458e-27
Add3	0.277719	7.03248e-07	Gltp	-0.445317	1.63764e-27
Clec4a2	0.23371	7.15097e-07	Acvrl1	-0.629311	1.79099e-27
Ints6	0.296356	7.37663e-07	Ms4a6c	-0.597817	1.84131e-27
Dennd6a	0.227343	8.10881e-07	Capzb	-0.2592	2.09844e-27
Hdac9	0.205658	8.16009e-07	Apobec1	-0.443652	2.5839e-27
Anapc15	0.282114	9.23135e-07	Rilpl2	-0.566028	2.95992e-27
Sin3a	0.256299	9.29382e-07	Myl6	-0.329101	3.74919e-27
Lemd3	0.245369	9.3462e-07	Spcs1	-0.37586	5.83774e-27
Kansl1l	0.214821	9.60626e-07	Ndufb8	-0.41705	8.78031e-27
Fmr1	0.260886	1.04136e-06	Eif4a1	-0.293652	9.19651e-27
Arl13b	0.282035	1.04852e-06	Litaf	-0.313894	1.44595e-26
Rnf167	0.21813	1.09277e-06	Atp8a1	-0.309592	1.84613e-26
Usp22	0.216601	1.13391e-06	Taf10	-0.446662	1.84613e-26
Prkx	0.257896	1.17226e-06	Trim35	-0.581264	2.07839e-26
Cep68	0.235581	1.17231e-06	Lat2	-0.416999	2.17638e-26
Gtf2ird2	0.283734	1.19112e-06	Dynll1	-0.377012	2.30452e-26
Scmh1	0.201526	1.24441e-06	Lrrfip1	-0.355207	2.36566e-26
Ypel5	0.24818	1.34183e-06	Abracl	-0.458448	3.35718e-26
Stx5a	0.209474	1.38408e-06	Cox5b	-0.387532	4.10137e-26
Prpsap2	0.214317	1.43883e-06	Eif3i	-0.43296	4.33404e-26
Pik3ca	0.217414	1.50243e-06	Ddost	-0.391664	4.68331e-26
Abcb7	0.262467	1.63212e-06	Ubxn1	-0.380784	7.6678e-26
Zfp871	0.214119	1.81398e-06	Ppia	-0.225863	7.794e-26
Pals1	0.250801	2.08625e-06	Tkt	-0.418336	1.07752e-25
Ppp1r3b	0.248844	2.21771e-06	Trim30a	-0.384342	1.85248e-25
Fat3	0.228844	2.44967e-06	Pvt1	-0.379736	1.86973e-25
Stat5b	0.215653	2.58073e-06	Sdf2l1	-0.444466	2.02093e-25
Hnrnph2	0.20468	2.58128e-06	Cox4i1	-0.267811	2.02093e-25
Dnajb9	0.229996	2.61243e-06	Resf1	-0.411957	2.54238e-25
Hmg20a	0.228979	2.62399e-06	Idnk	-0.495429	2.55156e-25
Garnl3	0.205514	3.43905e-06	Igbp1	-0.447093	2.61971e-25
Slc39a1	0.239934	3.52908e-06	Fam174a	-0.427855	2.83779e-25
Dhx40	0.325913	4.45461e-06	Lst1	-0.379709	3.38143e-25
Ufsp2	0.221793	4.4659e-06	Cct8	-0.426791	3.45784e-25
Tubgcp5	0.201869	4.86462e-06	Ndufb5	-0.407539	3.61674e-25
Ykt6	0.237577	5.21109e-06	Herc6	-0.566436	3.84573e-25
Siah1a	0.235079	5.71266e-06	Pik3r1	-0.342059	4.22478e-25
Golph3	0.216904	5.72862e-06	Psmb6	-0.403263	4.28603e-25
Cep85l	0.214277	5.99687e-06	Mdh1	-0.39333	5.62773e-25
Phtf2	0.23343	6.28359e-06	Sod2	-0.511969	8.24583e-25
Xpo7	0.218297	6.56694e-06	Hcfc1r1	-0.483139	1.14467e-24
Myadm	0.231955	6.57643e-06	Cd9	-0.238951	1.23488e-24
Marchf6	0.201649	7.19346e-06	Eef1g	-0.357759	1.29851e-24
Fgfr2	0.212037	7.52881e-06	Swi5	-0.411463	1.74616e-24
Casd1	0.218302	9.04453e-06	Tmsb4x	-0.21519	1.80156e-24
Sdk1	0.204353	9.43734e-06	Pde4dip	-0.457012	2.35739e-24
Ehbp1	0.237178	9.70271e-06	Casp1	-0.473843	2.38577e-24
Mknk2	0.225451	1.18516e-05	Hint1	-0.330197	2.41412e-24
Tef	0.232375	1.24474e-05	Pfn1	-0.23713	2.54254e-24
Pde4d	0.210315	1.3127e-05	Gnl2	-0.507645	2.59157e-24
Zfp703	0.238554	1.34961e-05	Il10rb	-0.355039	2.77439e-24
Ireb2	0.224877	1.46856e-05	Evl	-0.302271	2.92397e-24
Ppm1l	0.224716	1.58995e-05	Ppt1	-0.315726	3.44079e-24
Maco1	0.229934	1.60296e-05	Gnptab	-0.636655	3.74403e-24
Dusp7	0.208828	1.8488e-05	Tmem104	-0.413601	3.8264e-24
Map2k6	0.247419	1.95396e-05	Asah1	-0.2609	4.28593e-24
Abcg2	0.227724	1.97771e-05	Nudt9	-0.476963	5.25643e-24
Cpne1	0.221222	2.16151e-05	Parp14	-0.489941	7.79834e-24
Ppp3r1	0.216675	2.32924e-05	Crlf2	-0.49235	7.90568e-24
Rasa2	0.237251	2.36669e-05	Micos13	-0.399886	8.98756e-24
Hapstr1	0.202697	2.62271e-05	Crybb1	-0.346913	1.11658e-23
Usf1	0.2123	2.67983e-05	Cycs	-0.436926	1.17619e-23
Enox2	0.221644	4.38477e-05	Sri	-0.418565	1.49574e-23
Arhgap27	0.217497	4.997e-05	Tomm20	-0.344086	1.49856e-23
Etv1	0.228832	6.05343e-05	Arhgdia	-0.290345	1.56327e-23
Myo1b	0.223007	6.2358e-05	Tor3a	-0.493773	1.59664e-23
Dpy19l1	0.218333	6.606e-05	Lyn	-0.241583	1.63415e-23
Tmem65	0.219935	7.86326e-05	Atp5l	-0.324305	1.638e-23
Ube2q2	0.201484	7.99976e-05	Rab5if	-0.383553	1.75835e-23
Arrb1	0.203415	9.79619e-05	Ergic3	-0.344198	1.96132e-23
Slc16a7	0.222309	0.000104891	Acot9	-0.540231	2.74977e-23
Cited2	0.20881	0.000111398	Tlr2	-0.458075	3.29e-23
Mid1	0.231803	0.000117828	Psmb1	-0.342802	3.66769e-23
Arl5c	0.264232	0.00013047	Lhfpl2	-0.338158	3.96971e-23
Cdkn1b	0.207321	0.000144344	Klf13	-0.37183	4.1978e-23
Dnajc18	0.212542	0.000167552	Cyth1	-0.529421	4.19865e-23
Fgf13	0.200753	0.000234795	Amz1	-0.461136	4.27685e-23
Trim2	0.208108	0.000248208	Vps29	-0.400321	5.27387e-23
Znrf3	0.200861	0.000667441	Cd274	-0.602236	5.4682e-23
			Csf2ra	-0.45461	5.58711e-23
			Pld3	-0.436969	5.76324e-23
			Taok3	-0.330578	6.80901e-23
			Aig1	-0.426074	9.03767e-23
			Rplp1	-0.242256	9.05052e-23
			Tma7	-0.355926	1.07911e-22
			Abhd16a	-0.474504	1.15294e-22
			Hsp90b1	-0.256699	1.2857e-22
			Ppard	-0.356444	1.2857e-22
			Usp12	-0.423287	1.56001e-22
			Park7	-0.32942	1.74344e-22
			Dtx3l	-0.519068	1.86867e-22
			Ftl1	-0.250694	1.92304e-22
			Gpx4	-0.288493	1.94945e-22
			Sdc3	-0.552156	1.96865e-22
			Spi1	-0.215046	2.37576e-22
			Calm3	-0.440777	2.69855e-22
			Mapkapk2	-0.357999	2.93348e-22
			Psma1	-0.373951	4.02509e-22
			Gas5	-0.290311	4.36072e-22
			Bag1	-0.350284	6.50883e-22
			Pitpna	-0.278903	7.94925e-22
			Uqcrfs1	-0.413712	7.94925e-22
			Gusb	-0.348191	8.65744e-22
			Gns	-0.23994	9.03223e-22
			Anp32b	-0.399652	9.09889e-22
			Lamtor1	-0.319838	9.26364e-22
			Grb2	-0.262642	9.87121e-22
			Atp5d	-0.329061	1.07519e-21
			Ggh	-0.448587	1.16766e-21
			Camk1d	-0.251783	1.20297e-21
			Prr13	-0.404805	1.24813e-21
			Syngr2	-0.29447	1.44344e-21
			Fkbp2	-0.364349	1.72981e-21
			Psma4	-0.399758	1.81273e-21
			Rab43	-0.336619	1.87876e-21
			Eif2ak2	-0.481287	2.64136e-21
			Rbm42	-0.41818	3.31849e-21
			Rab20	-0.380964	3.53332e-21
			Srp9	-0.364923	3.66882e-21
			Ddt	-0.48966	3.92624e-21
			Tle5	-0.360877	4.48575e-21
			Rpn2	-0.309638	4.51999e-21
			Zfp64	-0.65644	4.7959e-21
			Lgals9	-0.301144	5.00774e-21
			Gng12	-0.372269	5.03629e-21
			Rapgef1	-0.304288	5.20194e-21
			Ik	-0.355041	8.54741e-21
			C4b	-0.561056	1.01356e-20
			Peds1	-0.443109	1.10848e-20
			Tapbpl	-0.487244	1.31108e-20
			Tmem179b	-0.40687	1.36196e-20
			Sdhd	-0.446907	1.37561e-20
			Chmp4b	-0.279851	1.89632e-20
			Scarb2	-0.253931	2.05466e-20
			Fundc2	-0.505104	2.18611e-20
			Atp6v0e	-0.280057	2.22923e-20
			Gng5	-0.263937	2.80042e-20
			Etfb	-0.408606	2.83071e-20
			Bmpr1a	-0.39203	3.01661e-20
			Ddrgk1	-0.32387	3.34687e-20
			Ttc39b	-0.378022	3.75863e-20
			Rassf4	-0.35439	4.4986e-20
			Cox6a1	-0.333918	7.4564e-20
			Capns1	-0.336111	7.79238e-20
			Htt	-0.410987	7.89869e-20
			Phf11b	-0.563245	1.10167e-19
			Dnajb11	-0.394514	1.11708e-19
			Tcp1	-0.387809	1.55543e-19
			Aurkaip1	-0.419233	1.60543e-19
			Ftl1-ps1	-0.481386	1.62033e-19
			Pebp1	-0.323748	1.63456e-19
			Scpep1	-0.337493	1.75436e-19
			Ndufc2	-0.305547	2.50565e-19
			Lcp1	-0.259629	2.54004e-19
			Tnfrsf1a	-0.333725	2.56388e-19
			Epb41l3	-0.519832	2.72106e-19
			Hif1a	-0.348404	2.78407e-19
			Psmd8	-0.365886	3.65216e-19
			Cacybp	-0.433826	3.93323e-19
			Ndufb1	-0.33592	4.00391e-19
			Fuca1	-0.321013	4.0654e-19
			Tomm22	-0.36084	4.45283e-19
			Lman2	-0.372896	5.42483e-19
			Nt5c	-0.475451	5.89882e-19
			Snx20	-0.299597	7.1381e-19
			Atp5j2	-0.309325	7.67177e-19
			Nlrp1b	-0.338412	8.22984e-19
			Calm1	-0.273696	8.37224e-19
			Rbx1	-0.292954	8.88309e-19
			Ninj1	-0.368298	9.07054e-19
			Rexo2	-0.418202	9.69669e-19
			Tmsb10	-0.355108	1.02943e-18
			Mif4gd	-0.469228	1.13119e-18
			Minpp1	-0.458383	1.38188e-18
			Ddx39b	-0.314409	1.52873e-18
			Fcgr4	-0.57465	1.63233e-18
			Parp12	-0.45702	1.72769e-18
			Hvcn1	-0.332512	1.88359e-18
			D8Ertd738e	-0.294073	2.07433e-18
			Tpr	-0.306798	2.14709e-18
			Cnih4	-0.379682	2.20001e-18
			Ankrd13a	-0.348813	2.49118e-18
			Myo1c	-0.412197	3.21097e-18
			Larp1	-0.293885	3.37092e-18
			Ubc	-0.23383	3.57746e-18
			Eef1d	-0.265238	3.5962e-18
			Hint2	-0.431827	3.70124e-18
			Snrpe	-0.353806	3.7973e-18
			Cep43	-0.418866	4.04748e-18
			Sin3b	-0.335122	4.24265e-18
			Pafah1b3	-0.447686	5.35501e-18
			Zc3hav1	-0.351811	5.71694e-18
			Psmd7	-0.365337	6.21929e-18
			Ms4a6d	-0.356224	6.35993e-18
			Cd47	-0.284814	6.70774e-18
			Cops6	-0.416167	7.35354e-18
			Vamp4	-0.337181	7.82141e-18
			Nedd8	-0.299551	8.51233e-18
			Tmed2	-0.278074	1.06469e-17
			Ormdl2	-0.410243	1.24365e-17
			Ndufa12	-0.397542	1.33581e-17
			Gpr108	-0.428172	1.36045e-17
			Atp13a2	-0.430001	1.71564e-17
			Ptpmt1	-0.420653	1.73203e-17
			Cct2	-0.331502	1.73203e-17
			Selenok	-0.235135	1.79429e-17
			Rhog	-0.265635	2.0027e-17
			Eif3e	-0.297878	2.06259e-17
			Cox7a2l	-0.239177	2.14703e-17
			Echs1	-0.40231	2.34593e-17
			Pgd	-0.391373	2.85789e-17
			Zup1	-0.366742	3.06287e-17
			H2-Q6	-0.355794	3.3326e-17
			Snd1	-0.294918	3.36748e-17
			Eif3g	-0.395341	3.38959e-17
			Isg15	-0.670857	3.50911e-17
			Atp5g3	-0.388676	3.79159e-17
			Atp5o	-0.356894	4.10121e-17
			Pdcd6	-0.400063	4.17197e-17
			Rab8b	-0.239287	4.25581e-17
			Rer1	-0.309452	4.84768e-17
			Stat2	-0.490216	5.24848e-17
			Uqcrc2	-0.35011	5.57085e-17
			Mdh2	-0.336232	6.43039e-17
			Manf	-0.288348	6.88069e-17
			Eif4b	-0.350097	7.09152e-17
			Ap3b1	-0.253067	7.31261e-17
			Mospd2	-0.449369	7.57819e-17
			Ufc1	-0.370331	8.02534e-17
			Psmc5	-0.371568	8.20694e-17
			Srp14	-0.311947	8.4088e-17
			Ppib	-0.23391	8.41936e-17
			Fam167b	-0.393224	8.77111e-17
			Tbc1d14	-0.315986	1.07904e-16
			Mrpl51	-0.424163	1.09152e-16
			Arl6ip1	-0.219896	1.1492e-16
			Prdx2	-0.330203	1.1714e-16
			Trpm2	-0.400809	1.17708e-16
			Nop10	-0.382973	1.23192e-16
			Synj1	-0.296171	1.41097e-16
			Gnb2	-0.209163	1.83047e-16
			Aco2	-0.37166	1.84351e-16
			Coq10b	-0.318529	2.30794e-16
			Spg21	-0.369986	2.31711e-16
			Rars	-0.433978	2.42867e-16
			Ctdnep1	-0.36438	2.47225e-16
			Btbd1	-0.318491	3.06592e-16
			Slirp	-0.417756	3.41543e-16
			Serp1	-0.29339	3.92663e-16
			Plgrkt	-0.288562	3.9373e-16
			Ccnd1	-0.327151	3.96504e-16
			Ep400	-0.340295	4.2619e-16
			Prelid1	-0.370051	4.57034e-16
			Uqcc2	-0.37495	4.61479e-16
			Myo9b	-0.329404	5.15724e-16
			Use1	-0.325433	5.23623e-16
			Dbnl	-0.31273	5.29708e-16
			Lmo2	-0.231741	5.99008e-16
			Ifi204	-0.430682	6.12538e-16
			Rhoh	-0.212525	6.15963e-16
			Ube2v1	-0.36922	7.50532e-16
			Trir	-0.281765	7.9078e-16
			Dpm1	-0.327869	8.10279e-16
			Bax	-0.329725	8.18274e-16
			Cotl1	-0.244485	8.82275e-16
			Fau	-0.201028	9.69746e-16
			Txndc17	-0.340839	1.01331e-15
			Lrrk1	-0.264423	1.01367e-15
			Aimp1	-0.35349	1.08964e-15
			Nme1	-0.378312	1.47937e-15
			Nfu1	-0.38165	1.48977e-15
			Jpt1	-0.276162	1.70931e-15
			Ndufa6	-0.289863	1.74558e-15
			Svbp	-0.370859	2.02061e-15
			Ifih1	-0.578047	2.07166e-15
			Mrpl54	-0.41311	2.48667e-15
			Ndufs7	-0.296989	2.75586e-15
			Txn2	-0.380725	2.98361e-15
			Cnbp	-0.238312	3.21591e-15
			Aup1	-0.304031	3.52077e-15
			Lrch3	-0.281108	4.36553e-15
			Ndufa8	-0.324119	4.52933e-15
			Tor1aip1	-0.229316	4.5402e-15
			Sumo2	-0.231631	4.58665e-15
			Nudc	-0.315092	4.74829e-15
			Lamtor2	-0.324613	5.03252e-15
			Cybb	-0.691711	5.48895e-15
			Inpp4a	-0.395013	5.73218e-15
			Il18	-0.320972	6.60426e-15
			Psmb3	-0.299133	6.79893e-15
			Mbd2	-0.355734	6.81013e-15
			Prpf40a	-0.265392	6.9698e-15
			N4bp1	-0.318662	7.16727e-15
			Rhbdf2	-0.452309	7.38958e-15
			Tbc1d10a	-0.326075	8.74362e-15
			Nmi	-0.417767	8.8288e-15
			Atp6ap1	-0.250695	9.80778e-15
			Fuca2	-0.350933	1.19382e-14
			Clic4	-0.414706	1.20563e-14
			Stx12	-0.357902	1.26315e-14
			Scamp3	-0.353942	1.37896e-14
			Mrpl11	-0.389931	1.47046e-14
			Kxd1	-0.358767	1.48899e-14
			Pip5k1c	-0.366742	1.49158e-14
			Phb2	-0.315055	1.50212e-14
			Psmb5	-0.312683	1.54472e-14
			Glrx5	-0.404658	1.54623e-14
			Pdia6	-0.261459	1.59379e-14
			Rhoq	-0.245366	1.72567e-14
			Atxn10	-0.291476	1.94095e-14
			Psmc2	-0.338589	2.20432e-14
			Cct7	-0.313431	2.4326e-14
			Egr2	-0.465044	2.52769e-14
			Blvrb	-0.351096	2.62868e-14
			Ran	-0.289169	2.94442e-14
			Mideas	-0.311014	3.04094e-14
			Aph1a	-0.348492	3.07326e-14
			Lncpint	-0.272097	3.20751e-14
			Mcfd2	-0.319706	3.5126e-14
			Hps4	-0.253935	3.67953e-14
			Tfg	-0.362177	4.15208e-14
			Gfer	-0.3707	4.17468e-14
			Lamtor5	-0.339268	4.19335e-14
			Plbd2	-0.328367	4.31333e-14
			Ndufa13	-0.265697	4.7508e-14
			Tmem134	-0.344357	4.77083e-14
			Nono	-0.309652	4.94914e-14
			Plekhj1	-0.328729	4.96599e-14
			Tcirg1	-0.254274	4.97243e-14
			Syk	-0.261664	5.68915e-14
			Emc4	-0.38348	6.33435e-14
			Hat1	-0.407486	6.96582e-14
			Cyp4v3	-0.352169	7.81399e-14
			Acsl5	-0.37745	7.82826e-14
			Prdx6	-0.406812	7.82826e-14
			Rbm7	-0.317818	8.03599e-14
			Utp3	-0.341523	8.03792e-14
			Max	-0.333976	8.94494e-14
			Gaa	-0.373751	9.04474e-14
			Ube2e1	-0.300316	9.06491e-14
			Snu13	-0.293669	9.53091e-14
			Sem1	-0.261464	9.87697e-14
			Rnf180	-0.234752	9.98319e-14
			Plaur	-0.397839	1.00392e-13
			Atp5g1	-0.284335	1.00818e-13
			Osm	-0.490811	1.03308e-13
			Irf7	-0.563687	1.08404e-13
			Nherf1	-0.383405	1.10601e-13
			Naa20	-0.324566	1.16345e-13
			Cuedc2	-0.306198	1.26061e-13
			Hspa9	-0.318825	1.529e-13
			Irgm2	-0.427545	1.70986e-13
			Scand1	-0.272671	1.76658e-13
			Tmem50b	-0.353688	1.98268e-13
			Ndufb10	-0.285373	2.02432e-13
			Phf11d	-0.504197	2.11382e-13
			Suclg1	-0.352458	2.25087e-13
			Plk3	-0.356484	2.25666e-13
			Anxa6	-0.39998	2.33577e-13
			Ifitm3	-0.42136	2.34375e-13
			Tnfsf12	-0.37208	2.64363e-13
			Uqcrq	-0.272294	2.81655e-13
			Prpf38b	-0.263206	3.03456e-13
			Atp6v1d	-0.28922	3.27225e-13
			Atp5a1	-0.219976	3.74392e-13
			Ndufab1	-0.310466	4.65225e-13
			Mvb12a	-0.372911	4.82601e-13
			Lmo4	-0.361581	5.00687e-13
			Slc38a1	-0.338482	5.0283e-13
			Anapc5	-0.331282	5.04803e-13
			Ndufa5	-0.343553	5.05307e-13
			Zmat2	-0.316051	5.18183e-13
			Snap23	-0.251199	5.59712e-13
			Sgpp1	-0.45666	5.92063e-13
			Alkbh1	-0.378224	6.45555e-13
			Bola2	-0.349231	7.035e-13
			Abr	-0.277865	7.07971e-13
			Adora3	-0.302031	7.69871e-13
			Ets2	-0.371662	7.99595e-13
			Vti1b	-0.329235	8.49088e-13
			Sec61b	-0.251827	8.60503e-13
			Ubtd1	-0.294464	9.15409e-13
			ENSMUSG00000121501	-0.353463	9.39399e-13
			Higd1a	-0.345654	9.71262e-13
			Ubl3	-0.21506	9.71262e-13
			Lamtor4	-0.243537	1.04526e-12
			Dynlrb1	-0.293403	1.04526e-12
			Sra1	-0.354624	1.08699e-12
			Ciao2a	-0.33228	1.20629e-12
			Rtp4	-0.383012	1.27644e-12
			Hcar2	-0.487313	1.30291e-12
			Csnk1g3	-0.316542	1.34376e-12
			Pak1ip1	-0.357239	1.43143e-12
			Cdc37	-0.268374	1.47169e-12
			Sf3b6	-0.286032	1.48729e-12
			Keap1	-0.379137	1.60778e-12
			Gcnt2	-0.355023	1.76753e-12
			Tor1aip2	-0.291896	1.86096e-12
			Cdk2ap2	-0.291823	1.90643e-12
			Pim1	-0.397346	1.99913e-12
			Fkbp8	-0.282451	1.99913e-12
			Sema4d	-0.243752	2.23937e-12
			Cope	-0.282754	2.31684e-12
			Aprt	-0.337704	2.41814e-12
			Lmna	-0.466846	2.56511e-12
			Dop1b	-0.33845	2.63367e-12
			Mrps16	-0.351899	2.64837e-12
			Dync1h1	-0.260919	3.13581e-12
			Ap2m1	-0.292246	3.14879e-12
			Glrx3	-0.308774	3.54131e-12
			Zmiz2	-0.370889	3.55916e-12
			BC004004	-0.332792	3.57432e-12
			Dynlt2b	-0.370823	3.57432e-12
			Trim34a	-0.381598	4.14924e-12
			Cox7b	-0.273413	4.38756e-12
			Nfat5	-0.271955	4.39338e-12
			Coa3	-0.311054	4.42559e-12
			Mrpl30	-0.323287	4.49056e-12
			Ago2	-0.307738	4.51097e-12
			Rabgef1	-0.28357	5.54236e-12
			Txndc9	-0.323481	5.66396e-12
			Mapkapk3	-0.368116	5.66573e-12
			Tmem160	-0.299087	5.95935e-12
			Eif3d	-0.313093	6.6194e-12
			Plekhm2	-0.234156	6.70082e-12
			Fbxw11	-0.236647	6.70595e-12
			Atox1	-0.21013	7.22186e-12
			Tbc1d1	-0.347522	7.33748e-12
			Eprs	-0.300879	7.36989e-12
			Alas1	-0.338479	7.42063e-12
			Slc31a1	-0.304004	8.21354e-12
			Snrpd1	-0.328564	8.27153e-12
			Psmb4	-0.273037	8.50745e-12
			Ndufb7	-0.271727	9.99919e-12
			Sys1	-0.281066	1.00983e-11
			H2az1	-0.206527	1.11383e-11
			Ppp1ca	-0.221055	1.24494e-11
			Hspa4	-0.226358	1.64202e-11
			Ndufv2	-0.306196	1.67438e-11
			Ifnar1	-0.322132	1.85347e-11
			Orai3	-0.329076	2.34299e-11
			Mfsd1	-0.296273	2.37179e-11
			Nenf	-0.299306	2.56011e-11
			Tecr	-0.245537	2.65838e-11
			Oasl2	-0.442176	2.66497e-11
			Fcf1	-0.33273	2.75158e-11
			Arpc5	-0.22332	2.75898e-11
			Tbc1d9	-0.23019	2.777e-11
			Psmd12	-0.301551	2.86572e-11
			Vps54	-0.259727	2.86981e-11
			Psmc6	-0.277191	3.01859e-11
			Rac2	-0.246634	3.0789e-11
			Stard9	-0.227443	3.15063e-11
			Stub1	-0.292122	3.18532e-11
			Cox7a2	-0.235897	3.53434e-11
			Sec14l1	-0.245383	3.67325e-11
			Arl6ip5	-0.265523	4.07694e-11
			Amdhd2	-0.35916	4.08321e-11
			Fnbp1	-0.201904	4.18529e-11
			Wdfy1	-0.287378	4.33767e-11
			Denr	-0.280084	4.55393e-11
			Lyst	-0.28664	4.57825e-11
			Snf8	-0.293686	4.77015e-11
			Mrpl12	-0.323147	4.80982e-11
			Ola1	-0.339819	5.05883e-11
			Ranbp2	-0.277207	5.05883e-11
			Adar	-0.363953	5.06772e-11
			Atp2b1	-0.212861	5.27105e-11
			Arf5	-0.217169	5.70528e-11
			Smim29	-0.327242	5.71168e-11
			Akr1b10	-0.292713	6.44664e-11
			Ndufs2	-0.274715	6.59722e-11
			Mrps24	-0.299367	6.6717e-11
			Ube2m	-0.27541	6.90437e-11
			Dnajc13	-0.253947	6.96543e-11
			Slc35b1	-0.330964	7.66063e-11
			H2-M3	-0.259971	8.08599e-11
			Rab27a	-0.317564	8.41369e-11
			Cpd	-0.388115	9.13009e-11
			Psmd4	-0.247456	9.15337e-11
			Yipf1	-0.285534	9.15337e-11
			Atpif1	-0.215733	1.01529e-10
			Ndufb6	-0.345893	1.04229e-10
			Ube2i	-0.21062	1.18205e-10
			Larp4b	-0.209126	1.22578e-10
			Lsm4	-0.312192	1.28759e-10
			Plekho2	-0.211554	1.29427e-10
			Sp100	-0.327347	1.30767e-10
			Slfn2	-0.317588	1.339e-10
			Ripk2	-0.286549	1.45385e-10
			Snrpd2	-0.273718	1.4674e-10
			Ilrun	-0.275502	1.53176e-10
			Cct3	-0.282829	1.65367e-10
			Rheb	-0.216341	1.76508e-10
			Ifi27l2a	-0.323892	1.88151e-10
			Dazap2	-0.229686	2.06757e-10
			Timm10b	-0.245067	2.0835e-10
			Themis2	-0.278452	2.10387e-10
			Adh5	-0.296542	2.13285e-10
			Mrpl18	-0.327228	2.58214e-10
			Cd300a	-0.232234	2.77707e-10
			Naglu	-0.281659	2.80409e-10
			Irf1	-0.286847	2.83218e-10
			Cd48	-0.254308	2.83591e-10
			Dnajc3	-0.238614	2.86156e-10
			Erp44	-0.29831	2.95326e-10
			Il21r	-0.222242	2.99215e-10
			Ly9	-0.413289	2.99588e-10
			Necap2	-0.260286	3.02071e-10
			Banf1	-0.327114	3.06025e-10
			Ndufb11	-0.239925	3.0669e-10
			Sf3b3	-0.320974	3.29358e-10
			Gpr107	-0.289296	3.48449e-10
			Stk38l	-0.368321	3.70532e-10
			Cd300lf	-0.532272	3.73252e-10
			Dnajc2	-0.318042	3.91532e-10
			Atxn7l1	-0.230917	4.06809e-10
			Prdx3	-0.313408	4.09132e-10
			Mpc2	-0.265275	4.14039e-10
			Arl8a	-0.243485	4.46799e-10
			Xlr	-0.288224	4.58349e-10
			Timm23	-0.265783	4.7452e-10
			Snw1	-0.253419	4.96126e-10
			Lrrc59	-0.325761	5.00643e-10
			Slc50a1	-0.265191	5.19556e-10
			Tmed3	-0.239945	5.41171e-10
			Dnajb14	-0.287039	5.93078e-10
			Dnajc15	-0.327264	6.16483e-10
			Ndufs4	-0.259943	6.25781e-10
			Trappc1	-0.309193	6.36679e-10
			Ndufa11	-0.27337	6.39425e-10
			Elob	-0.2104	6.39818e-10
			Sugt1	-0.262279	6.90571e-10
			Myl12a	-0.220923	6.91004e-10
			Pa2g4	-0.306348	7.79218e-10
			Cops5	-0.312865	7.8612e-10
			Sorl1	-0.342959	7.94703e-10
			Tbcb	-0.262351	8.55484e-10
			Taf1d	-0.297735	8.83428e-10
			Smim3	-0.285456	9.13482e-10
			Psmd6	-0.30091	9.46418e-10
			Hcls1	-0.217512	9.58372e-10
			Nadk	-0.279398	9.95e-10
			Eif4g1	-0.230359	9.99668e-10
			Axl	-0.33511	1.03942e-09
			Tmpo	-0.305978	1.13165e-09
			Mrpl20	-0.289231	1.15065e-09
			Neu1	-0.287362	1.18637e-09
			Ndufv3	-0.2527	1.22508e-09
			Rogdi	-0.26532	1.24624e-09
			Trappc2l	-0.266467	1.26515e-09
			Mrpl42	-0.286803	1.54603e-09
			Eif6	-0.271882	1.71941e-09
			Copb2	-0.282478	1.85311e-09
			Lman1	-0.261078	1.91919e-09
			Chmp2a	-0.230675	1.96064e-09
			Nap1l1	-0.283905	1.98155e-09
			Mlf2	-0.236697	2.18664e-09
			Vgll4	-0.200739	2.30939e-09
			Pgs1	-0.301354	2.33082e-09
			Snrpb2	-0.273672	2.37229e-09
			Bbx	-0.263333	2.38719e-09
			Zfp106	-0.263929	2.48473e-09
			Dapp1	-0.204282	2.55338e-09
			Cmc1	-0.30685	2.565e-09
			Fbl	-0.250558	2.65976e-09
			Mrps7	-0.304108	2.66972e-09
			Wdr83os	-0.242647	2.79582e-09
			Pphln1	-0.314291	2.81441e-09
			Atp6v0a2	-0.231632	2.8468e-09
			Cnp	-0.298652	2.8948e-09
			Tmod3	-0.22921	2.91585e-09
			Ppm1g	-0.269252	2.91938e-09
			Wdr1	-0.228564	2.93323e-09
			Cog4	-0.336316	2.9537e-09
			Puf60	-0.266936	3.07894e-09
			Hdgf	-0.280229	3.11362e-09
			Rufy3	-0.272744	3.2764e-09
			Sf3a1	-0.312511	3.59579e-09
			Ntan1	-0.302063	3.6705e-09
			Wwp2	-0.241879	4.15218e-09
			Cmtm3	-0.281819	4.15218e-09
			Tmem9b	-0.26327	4.25466e-09
			Mrpl23	-0.248889	4.25466e-09
			Slc6a6	-0.202757	4.27795e-09
			Tmem128	-0.258144	4.32751e-09
			Ubald2	-0.233788	4.58078e-09
			Bscl2	-0.278473	5.23895e-09
			Pfkfb3	-0.219436	5.71149e-09
			Wdr89	-0.323762	5.99018e-09
			Tmem11	-0.27622	6.05478e-09
			Slc2a1	-0.310595	6.22193e-09
			Mien1	-0.284244	6.30339e-09
			Zfas1	-0.270336	6.32111e-09
			Pfdn2	-0.234217	6.33759e-09
			Pts	-0.262554	6.52084e-09
			Trim26	-0.245156	7.3809e-09
			Pgls	-0.218654	7.75614e-09
			Lacc1	-0.203542	7.96157e-09
			Glod4	-0.285937	8.06288e-09
			Ccdc107	-0.280622	8.30188e-09
			Uqcrc1	-0.242375	8.78885e-09
			Emc6	-0.266241	9.01239e-09
			Nagk	-0.312945	9.09008e-09
			Csnk2b	-0.254911	9.19191e-09
			Napa	-0.244433	1.03276e-08
			Nudt21	-0.301809	1.15818e-08
			Hnrnpa1	-0.202019	1.20801e-08
			Dhrs7	-0.265553	1.23152e-08
			Ostc	-0.237052	1.28967e-08
			Cnot6	-0.25213	1.29101e-08
			Oxa1l	-0.283219	1.31977e-08
			Osbpl8	-0.23369	1.48475e-08
			Dok1	-0.264898	1.51288e-08
			Trappc3	-0.253895	1.64072e-08
			Snhg12	-0.25416	1.66644e-08
			Hnrnpll	-0.319584	1.69449e-08
			Cox14	-0.258839	1.82741e-08
			Emc8	-0.28864	1.94054e-08
			Fam107b	-0.304518	1.94124e-08
			Arhgap25	-0.223405	2.0796e-08
			Epb41	-0.231226	2.10178e-08
			Ubr4	-0.264953	2.12479e-08
			Smdt1	-0.210061	2.16702e-08
			Ncbp2as2	-0.268361	2.4366e-08
			Dazap1	-0.239227	2.48486e-08
			Trim12a	-0.229697	2.50181e-08
			Nipa2	-0.215032	2.51935e-08
			Elovl1	-0.278808	2.61852e-08
			Flnb	-0.335633	2.90462e-08
			Hyi	-0.288597	2.97617e-08
			Hadhb	-0.255826	3.35409e-08
			Naxe	-0.254061	3.41877e-08
			Psmd13	-0.247182	3.48194e-08
			Nsmce4a	-0.268536	3.6022e-08
			Ripor2	-0.411504	3.84857e-08
			Grpel1	-0.27305	3.87495e-08
			Pfkl	-0.277504	3.91188e-08
			Ap2s1	-0.241583	4.1083e-08
			Slc25a39	-0.268439	4.43734e-08
			Gtpbp2	-0.248399	4.46116e-08
			Timm13	-0.228186	4.50433e-08
			BC005624	-0.254699	4.63889e-08
			Cyld	-0.226098	4.85417e-08
			Cenpb	-0.286663	4.9666e-08
			Tank	-0.250071	4.99291e-08
			St6galnac4	-0.217666	4.99291e-08
			Snrpd3	-0.258902	5.39279e-08
			Fes	-0.246243	5.68372e-08
			Renbp	-0.220136	5.7031e-08
			Cd82	-0.222764	6.08523e-08
			Timm8b	-0.279338	6.26435e-08
			Cct5	-0.232772	6.26584e-08
			Hsd17b12	-0.222026	6.28449e-08
			Plcb2	-0.292481	6.34491e-08
			Tmem33	-0.218359	6.55098e-08
			Antkmt	-0.223901	6.95041e-08
			Creb3	-0.275326	7.03324e-08
			Copz1	-0.255391	7.33313e-08
			Dynlt3	-0.27041	7.84305e-08
			Cetn3	-0.244305	8.70455e-08
			Dguok	-0.228605	8.99549e-08
			Dnaja1	-0.207175	9.6801e-08
			Ociad1	-0.211361	9.94947e-08
			BC031181	-0.205486	1.02731e-07
			As3mt	-0.275974	1.06137e-07
			Cisd2	-0.22142	1.15736e-07
			Cers6	-0.316392	1.17382e-07
			Mvp	-0.231239	1.17709e-07
			Eif2s1	-0.259735	1.24839e-07
			Rae1	-0.272856	1.24937e-07
			Exoc6	-0.216439	1.26939e-07
			Clec2d	-0.32016	1.31148e-07
			Gak	-0.219909	1.33507e-07
			Usp36	-0.282373	1.37837e-07
			Vkorc1	-0.216455	1.46106e-07
			Scp2	-0.230873	1.50628e-07
			Ndufa1	-0.244478	1.5547e-07
			Sars	-0.24227	1.5999e-07
			Lsm6	-0.225927	1.62591e-07
			Fryl	-0.213852	1.80662e-07
			Leprotl1	-0.23757	1.86039e-07
			Eif3l	-0.265788	1.9374e-07
			Ddx50	-0.203932	1.98483e-07
			Mapk1ip1l	-0.225414	2.07602e-07
			Rnf14	-0.275718	2.12707e-07
			Bod1l	-0.215055	2.28132e-07
			Cyc1	-0.231938	2.31146e-07
			Tmem208	-0.225387	2.34941e-07
			Ppp4c	-0.221195	2.38996e-07
			Nubp1	-0.278971	2.75128e-07
			Mgat2	-0.23838	2.96919e-07
			Mkrn1	-0.228398	3.06689e-07
			Pgap2	-0.259351	3.07757e-07
			Surf4	-0.235588	3.09364e-07
			Mtch2	-0.236007	3.21511e-07
			H13	-0.216277	3.25255e-07
			Ap3d1	-0.231209	3.38535e-07
			Cenpx	-0.231071	3.62619e-07
			Ston2	-0.234379	3.63359e-07
			Cmpk1	-0.214312	3.6795e-07
			Polr2g	-0.234687	3.70289e-07
			Odc1	-0.292835	3.70915e-07
			Malt1	-0.306531	3.76674e-07
			Spsb1	-0.250406	3.93602e-07
			Ccrl2	-0.225816	4.29569e-07
			Ndufb2	-0.255145	4.44752e-07
			Stx18	-0.246431	4.48022e-07
			Tomm70a	-0.266621	4.49087e-07
			Hpf1	-0.246924	4.50717e-07
			Ccl2	-0.555274	4.54996e-07
			Lsm12	-0.223671	4.92478e-07
			Impdh2	-0.269972	4.97042e-07
			Secisbp2	-0.258611	5.06244e-07
			Jtb	-0.235817	5.17386e-07
			Psmc4	-0.24504	5.30541e-07
			Dnttip2	-0.258639	5.62647e-07
			Ncf4	-0.226341	5.66088e-07
			Pigt	-0.257657	5.7181e-07
			Manbal	-0.250746	5.77702e-07
			Trak1	-0.20128	6.00581e-07
			Ahsa1	-0.248359	6.08468e-07
			Snrnp27	-0.235861	6.09906e-07
			Mrps14	-0.227303	6.3008e-07
			Trappc6b	-0.212504	6.31935e-07
			Chordc1	-0.238387	6.35824e-07
			H2aj	-0.243242	6.76287e-07
			Ndufs6	-0.229648	7.92459e-07
			Med7	-0.230454	7.97738e-07
			Usp18	-0.4048	8.16009e-07
			Rab8a	-0.249164	8.36136e-07
			Batf3	-0.238279	8.87282e-07
			Ensa	-0.243904	9.09753e-07
			Mms19	-0.232591	9.15547e-07
			Commd4	-0.243504	9.17655e-07
			Pole4	-0.263161	9.20892e-07
			Tomm34	-0.236502	9.34077e-07
			Pfdn1	-0.243419	9.67658e-07
			Fibp	-0.250871	9.75204e-07
			Psmc1	-0.243624	1.00567e-06
			Arf3	-0.219571	1.06776e-06
			Mrpl17	-0.217516	1.15761e-06
			Marchf2	-0.258331	1.17911e-06
			Hspa14	-0.242798	1.18281e-06
			Unc50	-0.209972	1.20815e-06
			Rnf34	-0.235327	1.2458e-06
			Acadl	-0.228588	1.28639e-06
			Tmem167	-0.212548	1.28639e-06
			Mrps18c	-0.253458	1.28734e-06
			Chuk	-0.253547	1.28869e-06
			Stmp1	-0.241453	1.31479e-06
			Fggy	-0.283617	1.33047e-06
			Igsf6	-0.275073	1.33173e-06
			Scaf4	-0.215484	1.34619e-06
			Ranbp1	-0.213306	1.40074e-06
			Snapc1	-0.263644	1.46782e-06
			Exosc5	-0.229303	1.50085e-06
			Bfar	-0.2128	1.52976e-06
			Arhgap15	-0.307468	1.54972e-06
			Plagl2	-0.261555	1.59262e-06
			Rigi	-0.280291	1.81398e-06
			Atp5k	-0.204099	2.00997e-06
			Sf3b5	-0.213401	2.15528e-06
			Mrpl24	-0.207778	2.20348e-06
			Lamtor3	-0.225551	2.25067e-06
			Ctbs	-0.244224	2.40876e-06
			Imp3	-0.227652	2.58535e-06
			Adam9	-0.264957	2.59426e-06
			Mroh1	-0.239907	2.61342e-06
			BC028528	-0.228861	2.69623e-06
			Chchd1	-0.237703	2.74977e-06
			Xaf1	-0.261515	2.87421e-06
			Ubxn6	-0.241603	3.16608e-06
			Mcur1	-0.212778	3.6234e-06
			Cct6a	-0.208725	3.68572e-06
			Tmem140	-0.237278	4.53145e-06
			Phax	-0.237006	5.1595e-06
			Xpo6	-0.216327	5.1817e-06
			Fam32a	-0.218221	5.5906e-06
			Pkp4	-0.225812	5.5906e-06
			Pigk	-0.220939	5.9071e-06
			Uap1	-0.234505	6.52102e-06
			Ifi211	-0.40623	6.52657e-06
			Glb1	-0.222809	6.55608e-06
			Psmb7	-0.213741	6.58822e-06
			Tomm5	-0.230056	6.66621e-06
			Psmd2	-0.219696	6.73882e-06
			Dapk1	-0.271	7.0449e-06
			Llph	-0.207425	7.14636e-06
			Virma	-0.239328	7.57269e-06
			Rnase6	-0.27463	8.33053e-06
			Vamp5	-0.224436	8.56906e-06
			Clptm1l	-0.205882	8.64701e-06
			Med14	-0.268317	8.74359e-06
			Churc1	-0.242584	8.8082e-06
			Slfn8	-0.231495	9.09696e-06
			Blvra	-0.228722	9.53059e-06
			Pigx	-0.218731	1.08841e-05
			Tnfaip2	-0.289289	1.09541e-05
			Smu1	-0.214714	1.27042e-05
			Slamf9	-0.213649	1.29106e-05
			Nt5dc3	-0.263106	1.34065e-05
			Babam1	-0.222942	1.36328e-05
			Hacd4	-0.246879	1.39613e-05
			Nfkbib	-0.202141	1.48237e-05
			Nab1	-0.222579	1.66826e-05
			Mrpl14	-0.218237	1.69632e-05
			Arl6ip4	-0.226801	1.70664e-05
			Wdr43	-0.206674	1.79728e-05
			Fam222b	-0.214572	1.8488e-05
			Samm50	-0.208908	1.86912e-05
			Elovl5	-0.276568	1.966e-05
			Abhd17a	-0.200002	1.98039e-05
			Qdpr	-0.212715	2.04135e-05
			Gadd45gip1	-0.215019	2.24505e-05
			Dot1l	-0.233044	2.38906e-05
			Rnf149	-0.225382	2.42868e-05
			Uqcc3	-0.216807	2.51647e-05
			Tor2a	-0.213498	2.59028e-05
			Tiparp	-0.230957	2.65239e-05
			Nfkbie	-0.227524	2.80936e-05
			Mrps36	-0.22445	2.85022e-05
			Maea	-0.209483	3.148e-05
			Zc3h12a	-0.211493	3.28682e-05
			Brms1	-0.222517	3.4078e-05
			Rnf4	-0.215248	3.67312e-05
			Emc2	-0.2006	3.77485e-05
			Rbck1	-0.206966	3.77629e-05
			Arhgef7	-0.226873	4.57707e-05
			Pfdn6	-0.206572	4.63832e-05
			Dbndd2	-0.217924	4.8653e-05
			Nabp2	-0.207986	5.07254e-05
			Gart	-0.233249	5.11728e-05
			Slc16a10	-0.213358	5.41014e-05
			Diaph1	-0.225356	5.49742e-05
			Id2	-0.20008	5.5027e-05
			Iigp1	-0.486099	6.22977e-05
			Ssrp1	-0.209085	7.15867e-05
			Cabin1	-0.206254	7.25942e-05
			Cyria	-0.214239	7.70171e-05
			Prkcsh	-0.205042	7.7388e-05
			Psmg4	-0.21322	8.74304e-05
			Ndufv1	-0.206282	9.1414e-05
			Coq5	-0.222258	9.17435e-05
			Cyb5r4	-0.21525	9.62698e-05
			Hypk	-0.204125	9.65251e-05
			Ccdc124	-0.202391	9.83259e-05
			Vps13c	-0.20521	0.000103676
			Tesk1	-0.20541	0.000133805
			Tmem123	-0.216244	0.000136571
			Zfp992	-0.232898	0.000156223
			Acp1	-0.201986	0.000174702
			Prpf38a	-0.205073	0.00019021
			Myo5a	-0.241977	0.000210222
			Paf1	-0.212894	0.000370435
			Nr4a3	-0.392638	0.000405642
			Il1b	-0.269041	0.000506269
			Egr3	-0.242074	0.00127883
			Cxcl10	-0.427736	0.00154973
			Ddx60	-0.223397	0.00158525
			Cdkn1a	-0.208773	0.00395391
			Gbp5	-0.230079	0.00490328
			Cxcl9	-0.420359	0.00521174

## Sheet: Supplementary Table 6
Supplementary Table 6. List of DEGs up and down regulated in HHcy diet (HHcy_VIVIT vs HHcy_EGFP) for males (from Figure 4E).
Vivit up			Vivit down
Gene	logFC	FDR	Gene	logFC	FDR
Cst3	0.483153	3.92614e-97	Ctss	-0.534421	8.13103e-181
Jun	0.620692	9.34268e-65	Lrmda	-0.679329	2.732e-168
Atf3	0.430666	5.44944e-44	Unc93b1	-0.41394	2.29619e-167
Rhob	0.343543	1.19127e-35	Ppm1h	-0.677289	5.07175e-164
Ier5	0.337234	1.71237e-35	Psap	-0.5835	6.246e-155
Ier2	0.463716	2.09019e-33	C1qb	-0.471928	4.78181e-147
P2ry12	0.285397	7.36116e-32	Lyn	-0.54536	1.37034e-146
H2bc4	0.613553	2.49831e-31	H2-D1	-0.714803	9.70434e-144
Zfand5	0.361704	3.08315e-31	Grn	-0.534133	3.08185e-142
H3f3b	0.295916	2.26937e-27	Lgmn	-0.364086	2.01892e-140
Egr1	0.365135	4.82155e-26	Fyb	-0.572063	1.49488e-139
Jund	0.301175	2.14124e-25	Etv6	-0.60864	4.24173e-138
Ltc4s	0.306695	2.44853e-25	Ctsb	-0.584392	2.00163e-130
Btg2	0.278919	3.31861e-24	Cyrib	-0.44551	3.86561e-130
Junb	0.282772	1.45399e-23	C1qc	-0.406993	3.74803e-129
Sparc	0.236618	1.7721e-21	Dock4	-0.442239	4.56966e-129
Pnrc1	0.250799	1.06491e-20	Camk1d	-0.543656	2.10026e-125
Actg1	0.226471	2.3295e-20	Zeb2	-0.517345	1.06048e-117
D17H6S56E-5	0.575568	6.4309e-20	Tns3	-0.561642	4.01879e-115
Ckb	0.235829	1.54134e-19	Mpeg1	-0.543212	4.71584e-115
Tuba1a	0.426493	5.43073e-19	Chd7	-0.548623	8.12031e-113
Sertad1	0.453882	9.2348e-19	Ssh2	-0.561778	2.0897e-111
Gnas	0.239059	1.69375e-18	Itm2b	-0.403539	5.62345e-110
Gpr34	0.237679	2.41782e-18	Lhfpl2	-0.63074	1.87132e-109
Ppp1r15a	0.329334	7.18957e-18	Arid5b	-0.823978	3.13076e-109
Rgs2	0.272084	4.38672e-17	C1qa	-0.456309	1.2004e-108
Plp1	0.403116	5.88012e-17	Ly86	-0.478304	2.23365e-107
Ddit3	0.338322	1.4305e-15	H2-K1	-0.608192	3.71683e-102
Ppp1r10	0.312707	2.31502e-15	Malat1	-0.348782	6.45052e-102
Nfkbia	0.301959	1.06419e-14	Ctsh	-0.434089	4.68973e-101
Kctd12	0.227404	1.83217e-14	Ctsz	-0.485172	2.7083e-100
Atf4	0.269426	1.88732e-14	Ccnd3	-0.59272	7.78985e-100
Camk2n1	0.272113	8.39651e-14	Apoe	-1.16004	1.91635e-99
Chd4	0.237692	6.44717e-13	Frmd4b	-0.445845	2.32699e-98
Sox4	0.369392	1.13966e-12	Mitf	-0.583131	2.57032e-98
Cd164	0.224951	1.8633e-12	Man2b1	-0.461783	2.93989e-98
Nfkbiz	0.259121	3.17834e-12	Nmt1	-0.50921	6.78307e-98
Ecscr	0.241836	7.22747e-11	Atp8a1	-0.513103	5.80201e-96
Klf4	0.344653	6.42701e-10	Cd52	-0.696853	1.02025e-95
Csmd3	0.215586	1.00667e-09	ENSMUSG00000095041	-0.532256	4.90061e-95
Errfi1	0.360916	1.40013e-09	Dock2	-0.418148	1.63351e-94
Cbx4	0.256227	2.93231e-09	Itgb5	-0.395168	3.4273e-94
Marcksl1	0.294269	3.49151e-09	Prkcb	-0.498621	2.42961e-92
Ints6	0.294411	5.45349e-09	Apobec3	-0.566937	3.88375e-92
Mknk2	0.245737	7.28152e-08	Abr	-0.628956	5.57812e-92
Rybp	0.210869	9.26157e-08	Eef2	-0.46192	1.06289e-91
Ptpro	0.215307	1.11777e-07	Runx1	-0.474457	1.78039e-91
Erf	0.207875	2.76578e-07	Celf2	-0.385855	6.5744e-91
Dusp7	0.221423	5.87877e-07	Scarb2	-0.473746	1.87081e-88
Inka1	0.221979	1.10217e-06	Rbm47	-0.556455	3.93737e-87
Tmx4	0.230613	4.43263e-06	Lamp1	-0.408997	5.57925e-86
Taf7	0.206682	8.15696e-06	Inpp5d	-0.348822	7.11735e-86
Cebpd	0.223142	1.07445e-05	Stxbp3	-0.675919	1.49655e-84
Cables1	0.202028	4.12228e-05	Gns	-0.414241	2.67779e-84
Arrdc3	0.226421	8.26055e-05	Mertk	-0.491479	5.42591e-84
			Evl	-0.493225	7.01592e-84
			Slc11a1	-0.609016	2.68742e-83
			Cmip	-0.473397	4.51987e-83
			Asah1	-0.428004	2.07157e-82
			Gsap	-0.592386	5.33148e-82
			Ophn1	-0.42928	7.40632e-82
			Eef1a1	-0.412666	2.69389e-81
			Pld4	-0.383105	2.04379e-80
			Cept1	-0.588316	6.40796e-79
			Wnk1	-0.403071	3.13591e-78
			Gab2	-0.3964	5.87434e-78
			Lrrk1	-0.526123	6.60224e-78
			Tapbp	-0.550886	7.42739e-78
			Lrch1	-0.416981	1.04838e-77
			Lag3	-0.437333	1.28674e-77
			Skap2	-0.426186	3.72189e-77
			Rbfox1	-1.01019	5.80168e-75
			Timp2	-0.498854	7.11834e-75
			Rtcb	-0.646503	1.46283e-74
			Ppt1	-0.492053	1.57022e-73
			Npc2	-0.434938	1.90198e-73
			Fcgr3	-0.351927	6.61005e-73
			Lgals3bp	-0.556011	1.11589e-72
			Ctsc	-0.546689	1.64833e-72
			AW112010	-0.852755	3.9507e-72
			B2m	-0.430085	4.47957e-72
			Dpy19l4	-0.585667	6.31613e-72
			Itgb2	-0.502058	8.1826e-72
			Nsa2	-0.496965	9.44062e-72
			Extl3	-0.539704	1.73837e-71
			Rapgef1	-0.496781	8.82856e-71
			Aff1	-0.580337	9.7184e-71
			Gna13	-0.473753	1.44278e-70
			Gdi2	-0.376607	2.1891e-70
			Pvt1	-0.509572	7.27304e-70
			Pik3ap1	-0.471066	9.40474e-70
			Taok3	-0.49228	1.28725e-69
			Ikzf1	-0.420814	2.40133e-69
			Irf8	-0.409767	2.51134e-69
			Exoc4	-0.421518	3.07823e-69
			Clasp2	-0.426019	3.58325e-69
			Foxn3	-0.329249	4.71574e-69
			Srgn	-0.507355	5.41226e-69
			Cd81	-0.312332	6.57169e-69
			Apobec1	-0.604669	2.16284e-67
			Hk2	-0.47345	2.2503e-67
			Pnpla7	-0.479208	2.40948e-67
			H2-T23	-0.469983	3.46338e-67
			Itm2c	-0.390627	5.6568e-67
			Diaph2	-0.38541	7.27318e-67
			Gpi1	-0.583506	8.46544e-67
			Pan3	-0.433655	1.02108e-66
			Nrp1	-0.593064	2.17826e-66
			P4ha1	-0.574986	4.60138e-66
			Vps54	-0.544414	4.62407e-66
			Sh3kbp1	-0.410906	5.61898e-66
			Ly6e	-0.389271	5.68702e-66
			Atp8a2	-0.414366	1.44722e-65
			Ldlrad4	-0.348491	2.59254e-65
			Prpf38b	-0.515574	1.24337e-64
			Tpd52	-0.533467	5.01396e-64
			Calr	-0.434424	3.41263e-63
			Ap3b1	-0.423914	4.1796e-63
			Tcf4	-0.378452	1.82529e-62
			Pla2g4a	-0.520318	2.77345e-62
			Lyz2	-0.597477	2.91643e-62
			Epsti1	-0.463556	2.92877e-62
			Itpkb	-0.672293	4.42293e-62
			Tnfrsf1b	-0.48861	4.5357e-61
			Hexb	-0.22182	4.5844e-61
			Gnaq	-0.369682	4.86841e-61
			Lpcat2	-0.278663	9.12678e-61
			Ctsd	-0.308425	1.75089e-60
			Ctsa	-0.368661	2.47881e-60
			Sirpa	-0.309871	8.94429e-60
			Arhgdib	-0.437306	1.20144e-59
			Lair1	-0.295355	1.39893e-59
			Stat1	-0.536788	4.00284e-59
			Sdf4	-0.435044	1.30622e-58
			H2-DMa	-0.46367	1.67835e-58
			Maml2	-0.392018	2.1855e-58
			Cd63	-0.551253	4.66135e-58
			Hspa8	-0.36812	1.11468e-57
			Syk	-0.492716	1.40753e-57
			H2-Oa	-0.623806	1.56914e-57
			Dgkz	-0.572203	2.16522e-57
			Ptk2b	-0.452365	2.86874e-57
			Atp2b1	-0.440909	3.89596e-57
			P2rx4	-0.525432	4.34638e-57
			Cux1	-0.389599	1.51646e-56
			Fmnl2	-0.563011	1.95609e-56
			Snd1	-0.462956	2.65048e-56
			Ccl5	-1.16978	4.05869e-56
			Samhd1	-0.606427	4.5085e-56
			Dpysl2	-0.430326	4.57638e-56
			Btg1	-0.358534	7.2986e-56
			Irf2bp2	-0.367344	1.27759e-55
			Gatm	-0.521145	1.45848e-55
			Akap13	-0.358012	3.00973e-55
			Serinc3	-0.230287	3.29097e-55
			Irak2	-0.372395	7.06497e-55
			H2-Q7	-0.427477	7.32401e-55
			Fgd2	-0.386652	2.63897e-54
			Pkm	-0.553888	5.00427e-54
			Ambra1	-0.423233	6.49117e-54
			Myo9b	-0.508666	6.74282e-54
			Arid1b	-0.419306	7.94606e-54
			Sipa1l2	-0.41973	1.50404e-53
			Tmbim6	-0.312422	4.45739e-53
			Rere	-0.386689	4.52401e-53
			H2-Q4	-0.395061	1.40256e-52
			Nlrc5	-0.513836	2.255e-52
			Hexa	-0.32403	2.56036e-52
			Tgfbr2	-0.326352	1.1002e-51
			Ankrd11	-0.335433	2.14037e-51
			Ptpn1	-0.385233	4.12568e-51
			Irgm1	-0.611416	4.13382e-51
			Synj1	-0.441659	1.0397e-50
			Atxn7l1	-0.459578	1.33388e-50
			Cd48	-0.479941	1.50838e-50
			Slc1a3	-0.415795	1.98827e-50
			Rreb1	-0.343647	5.22189e-50
			Adgre1	-0.387358	5.43885e-50
			Btbd9	-0.367246	7.4263e-50
			Marf1	-0.579011	1.00353e-49
			Dnmt3a	-0.395482	1.11131e-49
			Exoc6	-0.500979	1.22748e-49
			Psmb8	-0.430765	1.28499e-49
			Mapk14	-0.467729	2.59687e-49
			Nedd4l	-0.489365	2.75876e-49
			Hk3	-0.601438	4.10923e-49
			Vamp4	-0.498479	5.07279e-49
			Capn3	-0.424149	7.97019e-49
			Otulinl	-0.31999	8.41032e-49
			Gabarap	-0.348939	9.32885e-49
			Ucp2	-0.340152	1.12651e-48
			Tlr2	-0.552107	1.37047e-48
			Abhd12	-0.35329	1.61385e-48
			Txn1	-0.640018	1.62439e-48
			Camk2d	-0.347614	1.82287e-48
			Htt	-0.536293	1.82423e-48
			Nek7	-0.349326	2.04563e-48
			Adap2	-0.326592	2.48891e-48
			Lnpep	-0.402248	2.5962e-48
			Eif3f	-0.37744	4.35321e-48
			Cd14	-0.535943	8.85119e-48
			Nfe2l2	-0.375218	8.87147e-48
			Fnbp1	-0.379882	1.14415e-47
			Tap2	-0.509357	1.16268e-47
			Rrbp1	-0.279941	1.29198e-47
			Tmem131	-0.507041	1.41802e-47
			Pabpc1	-0.347313	1.76111e-47
			Tap1	-0.483969	2.17262e-47
			M6pr	-0.466966	2.22041e-47
			Zfand3	-0.345135	2.42146e-47
			Tmem164	-0.438972	2.66196e-47
			Grina	-0.426942	3.36553e-47
			Ubash3b	-0.351211	3.44828e-47
			Asap1	-0.333807	7.61943e-47
			Cxcl16	-0.583634	9.23477e-47
			H2-T22	-0.508297	9.23477e-47
			Ptprj	-0.349069	9.44439e-47
			Anks1	-0.494968	1.63904e-46
			Map3k3	-0.41425	1.95785e-46
			Foxp1	-0.363977	2.24985e-46
			Slc25a3	-0.344145	3.61651e-46
			Fcgr2b	-0.414439	5.86505e-46
			Psmb9	-0.419604	9.25852e-46
			Dclre1c	-0.454671	9.25852e-46
			N4bp1	-0.487541	1.0853e-45
			Bmp2k	-0.346323	1.10759e-45
			Uvrag	-0.356562	1.56955e-45
			Pfkfb3	-0.420674	1.65067e-45
			Tbc1d5	-0.328604	1.69603e-45
			Rap1gds1	-0.320463	1.77919e-45
			Zfp64	-0.735758	1.94269e-45
			Abca1	-0.396967	2.1405e-45
			Cd84	-0.358112	2.43878e-45
			Pkig	-0.368889	3.50036e-45
			Tbc1d22a	-0.396036	4.05374e-45
			Csf3r	-0.323879	4.22274e-45
			Ptprc	-0.305908	4.48116e-45
			Psme1	-0.408266	4.65843e-45
			Slc8a1	-0.332364	5.63811e-45
			Tmem104	-0.479651	7.20183e-45
			Rhoh	-0.321928	1.54674e-44
			Rnpep	-0.471156	1.58951e-44
			Tnrc6b	-0.359427	2.51834e-44
			Vps35l	-0.525793	2.51834e-44
			Cd74	-0.655254	3.38579e-44
			Rplp0	-0.314172	4.42444e-44
			Naaa	-0.66374	4.51025e-44
			Kansl1	-0.31232	5.94113e-44
			Vps13c	-0.59126	1.34819e-43
			Fth1	-0.359741	1.64225e-43
			Ndufb1	-0.442357	2.21206e-43
			Nudcd3	-0.44318	2.2943e-43
			Hpcal1	-0.54218	2.8949e-43
			AU020206	-0.354939	2.942e-43
			Ybx1	-0.372252	3.34445e-43
			Tbc1d14	-0.441992	3.71371e-43
			Akt3	-0.457928	4.34282e-43
			Stx16	-0.485969	4.4281e-43
			Nsd1	-0.385221	4.70572e-43
			Slc31a2	-0.600612	1.60586e-42
			Tm9sf2	-0.432455	1.84041e-42
			Rack1	-0.305938	2.69356e-42
			Tbc1d9	-0.411649	2.84054e-42
			Birc6	-0.383449	2.99373e-42
			Papola	-0.368148	3.41133e-42
			Ifi30	-0.453965	5.01362e-42
			Atp13a2	-0.576842	6.00086e-42
			Herc4	-0.42612	1.64826e-41
			Glb1	-0.560829	2.02237e-41
			Mycbp2	-0.305775	2.87822e-41
			Sat1	-0.331762	4.10825e-41
			Aldoa	-0.44669	4.33378e-41
			Cerk	-0.351034	4.52093e-41
			Adam10	-0.345571	8.40749e-41
			H2-DMb1	-0.425325	8.69423e-41
			Mgat5	-0.351806	9.32902e-41
			Ttc39b	-0.445633	1.88418e-40
			Hivep3	-0.331002	2.04871e-40
			Cd180	-0.403832	2.18059e-40
			Cyba	-0.310866	3.26811e-40
			Parp9	-0.458421	3.86588e-40
			Myo1f	-0.330338	4.82734e-40
			Arl6ip5	-0.460573	5.54674e-40
			Fbxw11	-0.38561	6.80141e-40
			Dennd1a	-0.371788	7.35685e-40
			Spata13	-0.404472	7.45679e-40
			Slc9a9	-0.308462	7.45679e-40
			Akap8l	-0.422088	9.45987e-40
			Bmpr1a	-0.466186	1.1445e-39
			Ubn2	-0.371859	1.47739e-39
			Tent2	-0.41967	1.59897e-39
			Ifngr2	-0.322121	1.78592e-39
			Ppp3ca	-0.293072	2.82262e-39
			Cd47	-0.368356	3.26187e-39
			Capzb	-0.277827	3.28163e-39
			Tbc1d8	-0.498222	4.51866e-39
			Ripk2	-0.462398	4.69752e-39
			Pias1	-0.318287	1.02338e-38
			Scpep1	-0.394912	1.21786e-38
			Ms4a6c	-0.581871	1.36806e-38
			Chmp4b	-0.326182	1.62414e-38
			Csf2ra	-0.487104	1.69331e-38
			Pbxip1	-0.432333	1.94494e-38
			Il10rb	-0.392005	2.08543e-38
			Vps13b	-0.378517	2.7027e-38
			Cd86	-0.39638	2.74858e-38
			App	-0.365636	3.41204e-38
			Clta	-0.243011	4.26587e-38
			Fars2	-0.415133	4.31165e-38
			Picalm	-0.303463	4.73163e-38
			Hspe1	-0.363778	5.14295e-38
			Fcgr1	-0.328703	6.49452e-38
			Tspo	-0.482789	6.76937e-38
			Ell2	-0.563725	7.59853e-38
			Pitpna	-0.32453	8.99639e-38
			Lrch3	-0.373934	9.23261e-38
			Cdk8	-0.488493	9.26955e-38
			Zfp148	-0.382726	1.03931e-37
			Smim3	-0.46182	1.04109e-37
			Plekho2	-0.335717	1.10251e-37
			Zdhhc14	-0.418695	1.11592e-37
			Akr1a1	-0.336877	1.18449e-37
			Arfgef1	-0.453157	1.21394e-37
			Snap23	-0.372493	1.33347e-37
			Trip12	-0.369812	1.37966e-37
			Mkln1	-0.346206	1.40228e-37
			Eif4a2	-0.347634	1.74397e-37
			Rhog	-0.344857	1.75435e-37
			Wipf1	-0.421844	2.17472e-37
			Cd9	-0.263892	2.39326e-37
			Wdfy3	-0.337502	2.98588e-37
			Snrnp70	-0.317437	4.00438e-37
			Prex1	-0.345621	4.45902e-37
			Arpc4	-0.312011	5.31564e-37
			Tmsb10	-0.425767	5.7092e-37
			Adora3	-0.465523	5.72807e-37
			Psme2	-0.429205	6.63899e-37
			Lap3	-0.395956	8.37044e-37
			Lyst	-0.449799	8.71486e-37
			Notch2	-0.375752	8.72272e-37
			Atp5g2	-0.312892	1.02686e-36
			Dram2	-0.403779	1.02686e-36
			Fgl2	-0.450426	1.19102e-36
			Sema4d	-0.359715	1.19102e-36
			Cyth1	-0.56144	1.24592e-36
			Mark3	-0.410787	1.45918e-36
			Vav1	-0.319647	1.60141e-36
			Git2	-0.306994	2.66172e-36
			Glmp	-0.428215	2.70186e-36
			Aig1	-0.431402	3.054e-36
			Zbtb20	-0.285882	3.29318e-36
			Fau	-0.280657	3.98449e-36
			Adcy7	-0.441995	5.14683e-36
			Osbpl9	-0.353825	5.14683e-36
			Efhd2	-0.251868	7.41285e-36
			Mtus1	-0.373315	8.38396e-36
			Heatr5a	-0.374025	8.97492e-36
			Nampt	-0.461244	9.10656e-36
			Cops9	-0.414903	1.02904e-35
			Phf21a	-0.330588	1.04821e-35
			Lst1	-0.372529	1.28082e-35
			Cd300c2	-0.230816	1.38246e-35
			Gnai2	-0.226257	2.66696e-35
			Gbp2	-0.617624	3.12034e-35
			Vti1a	-0.364639	3.51733e-35
			Nipa2	-0.408495	3.51733e-35
			H2-Q6	-0.346778	3.71938e-35
			Sp140	-0.480988	4.07577e-35
			Pdia3	-0.304879	4.27436e-35
			Ehd4	-0.337967	5.40863e-35
			Spint1	-0.432829	5.67187e-35
			Ccz1	-0.457183	5.70634e-35
			Eif3h	-0.332005	5.70897e-35
			Ankfy1	-0.418766	5.74978e-35
			Pros1	-0.356723	6.4582e-35
			Trpm2	-0.465506	6.49014e-35
			Bbx	-0.446447	7.67389e-35
			Rassf3	-0.395773	1.04413e-34
			Galnt7	-0.459704	1.88287e-34
			Elk3	-0.358489	2.02825e-34
			Cadm1	-0.327741	2.94724e-34
			Cnot2	-0.359046	2.97543e-34
			Stx12	-0.486383	2.98043e-34
			Map2k1	-0.411153	3.25844e-34
			Smap2	-0.250332	4.07741e-34
			Pou2f2	-0.271032	4.31967e-34
			Lcp2	-0.344456	5.05627e-34
			Eif3e	-0.358091	5.07477e-34
			Coro7	-0.525129	5.17784e-34
			Rbm6	-0.362666	5.75939e-34
			Rassf4	-0.382069	5.86155e-34
			Themis2	-0.441243	6.71579e-34
			Hsd17b11	-0.40333	7.15363e-34
			Adam17	-0.355618	8.07466e-34
			Atp5e	-0.328447	8.65777e-34
			Tnfrsf11a	-0.439005	9.56491e-34
			Ppard	-0.375546	1.01686e-33
			Snx5	-0.260972	1.10746e-33
			Prdx1	-0.377612	1.24696e-33
			Dip2b	-0.26668	1.31229e-33
			Fcer1g	-0.236147	1.38257e-33
			Plek	-0.321035	1.45148e-33
			Atp6ap1	-0.34384	1.46759e-33
			Igtp	-0.569553	1.52536e-33
			Itpr2	-0.292524	1.70802e-33
			Ttr	-0.449768	1.7936e-33
			Rbpj	-0.377139	1.87516e-33
			Tbl1xr1	-0.347609	2.15326e-33
			Marchf1	-0.388644	2.24896e-33
			Tlk1	-0.430696	2.61755e-33
			Macf1	-0.247247	3.02798e-33
			Nsd3	-0.331512	3.42447e-33
			Pxn	-0.406488	3.52635e-33
			Tcf12	-0.334041	3.72904e-33
			Sdcbp	-0.282069	3.83584e-33
			Rilpl2	-0.412535	4.25406e-33
			Mbnl2	-0.299148	4.32787e-33
			Pik3r1	-0.348154	4.45409e-33
			Sem1	-0.352783	4.93329e-33
			Frmd4a	-0.246677	5.0407e-33
			Acer3	-0.316174	6.08146e-33
			Dnajc13	-0.390859	6.44632e-33
			Eef1b2	-0.28069	6.84572e-33
			Gpcpd1	-0.355652	6.97903e-33
			Pnisr	-0.352896	7.62575e-33
			Kat2b	-0.481895	8.74306e-33
			H2-Eb1	-0.45823	1.09549e-32
			Snx10	-0.368719	1.14359e-32
			Rnf216	-0.323311	1.16597e-32
			Mbd2	-0.448236	1.1909e-32
			Rbm25	-0.271538	1.35979e-32
			Ldha	-0.413118	1.47362e-32
			Herc6	-0.489793	1.66852e-32
			Dennd1b	-0.3982	1.72078e-32
			Igbp1	-0.427182	2.15184e-32
			Plaat3	-0.513582	2.57387e-32
			Ncoa2	-0.360167	2.57588e-32
			Pag1	-0.304429	2.73344e-32
			Mia2	-0.363805	3.67656e-32
			Tbca	-0.357129	3.70723e-32
			Phyhd1	-0.285386	4.74692e-32
			Atp9b	-0.361242	4.87309e-32
			Syngr2	-0.329332	5.05128e-32
			Stard9	-0.341008	5.10741e-32
			Ntpcr	-0.333577	5.25737e-32
			Atp5k	-0.428556	5.59607e-32
			Comt	-0.279029	5.81481e-32
			Ppfia4	-0.299142	5.82588e-32
			Sh3bgrl3	-0.287144	6.45809e-32
			Atp6v0e	-0.300343	7.0252e-32
			Rnf169	-0.396295	7.39268e-32
			Fto	-0.37232	7.7328e-32
			Cop1	-0.404491	8.18673e-32
			Fam174a	-0.407793	8.98994e-32
			Mapkapk2	-0.362303	9.47409e-32
			Rab43	-0.34282	1.03438e-31
			Arhgap39	-0.343153	1.15519e-31
			P2rx7	-0.39004	1.30171e-31
			Rap1b	-0.216783	1.4435e-31
			Vamp8	-0.303201	1.44831e-31
			Gde1	-0.417022	1.70195e-31
			Minpp1	-0.51433	1.9626e-31
			Tnrc6a	-0.396267	2.24264e-31
			Erp29	-0.247672	2.24264e-31
			Vav2	-0.452745	2.27268e-31
			Usp12	-0.413973	2.64031e-31
			Arhgap24	-0.419173	2.73136e-31
			Vrk2	-0.372605	2.97108e-31
			Washc4	-0.387989	3.98798e-31
			Serbp1	-0.293195	4.23701e-31
			Btbd1	-0.397376	4.31306e-31
			Acsl4	-0.375407	4.91524e-31
			Map2k5	-0.422112	4.9342e-31
			Cep120	-0.497732	4.9342e-31
			Rtraf	-0.35208	5.44461e-31
			Dnajc7	-0.350745	5.65177e-31
			Ndufa3	-0.415374	5.78639e-31
			Wbp1l	-0.476073	6.16235e-31
			Mark2	-0.387529	7.01043e-31
			Daglb	-0.291919	7.18352e-31
			Cyld	-0.398067	7.29426e-31
			Lrpap1	-0.411594	9.34716e-31
			Pgk1	-0.515378	9.96564e-31
			Rac2	-0.361348	1.12424e-30
			Dst	-0.251309	1.159e-30
			Faf1	-0.381905	1.29208e-30
			Ptpn6	-0.293331	1.4186e-30
			Gapdh	-0.302923	1.48404e-30
			Trim12a	-0.376901	1.48697e-30
			Fbxl17	-0.297334	1.59022e-30
			Wdfy4	-0.354214	1.70516e-30
			Vmp1	-0.293187	1.7809e-30
			Rasa4	-0.388056	2.18564e-30
			Zmynd8	-0.392649	2.44842e-30
			Wdfy2	-0.395681	2.83071e-30
			Dnajb14	-0.437896	2.96194e-30
			Rptor	-0.306215	3.57753e-30
			Tmed3	-0.382445	3.74815e-30
			Usp25	-0.350489	4.21352e-30
			Il6ra	-0.301946	4.41362e-30
			Tmem59	-0.245478	4.74604e-30
			Trappc8	-0.412013	4.76731e-30
			Hif1a	-0.365297	4.82498e-30
			Ifnar2	-0.273548	4.82498e-30
			Fndc3b	-0.340118	5.87956e-30
			Relch	-0.445925	5.94021e-30
			Plekha1	-0.418214	6.61829e-30
			Parp12	-0.466015	6.80984e-30
			Limd2	-0.298516	7.1714e-30
			Clint1	-0.268801	7.79082e-30
			Traf3	-0.390618	8.39369e-30
			Naa20	-0.411953	8.57954e-30
			Trim30a	-0.325111	8.60934e-30
			Atp6v0b	-0.218579	8.63424e-30
			Brd4	-0.288465	8.63424e-30
			Mfsd14a	-0.4808	8.741e-30
			Tmem131l	-0.446179	8.97512e-30
			Laptm4a	-0.237439	1.09957e-29
			Frrs1	-0.338555	1.2392e-29
			Ago2	-0.407511	1.25079e-29
			Tor1aip1	-0.276665	1.27494e-29
			Plcg2	-0.290899	1.37301e-29
			Tmod3	-0.363551	1.53953e-29
			Mllt10	-0.309765	2.22032e-29
			Atf6	-0.354598	2.57587e-29
			Snx29	-0.265597	2.59073e-29
			Plxnb2	-0.350946	2.9224e-29
			Fbxl20	-0.437394	3.03052e-29
			Sdf2l1	-0.420227	3.18954e-29
			Rnf180	-0.303854	3.21948e-29
			Bola2	-0.454146	4.33283e-29
			Psmb10	-0.386766	4.34785e-29
			Il21r	-0.349009	4.71963e-29
			Trim14	-0.440813	5.13707e-29
			Ncstn	-0.404131	5.62193e-29
			Fermt3	-0.252222	5.8581e-29
			Trim34a	-0.49721	6.39928e-29
			Gusb	-0.346882	6.48438e-29
			Anxa5	-0.531106	6.68343e-29
			Actr2	-0.257036	7.58408e-29
			Yipf1	-0.425711	8.12775e-29
			Csnk1g3	-0.422378	8.71505e-29
			Lrrc8d	-0.318951	1.08973e-28
			Zc3h7a	-0.352282	1.13209e-28
			Shisa5	-0.354627	1.32261e-28
			Usp8	-0.307268	1.46168e-28
			Stx8	-0.363124	1.48975e-28
			Ddi2	-0.347469	1.55006e-28
			Bicra	-0.424714	1.63543e-28
			Pitpnc1	-0.317292	1.81038e-28
			Tmem106a	-0.535264	1.87702e-28
			Slc36a1	-0.467784	2.2197e-28
			Ncor1	-0.274157	2.3783e-28
			Bsg	-0.270041	2.4859e-28
			Trafd1	-0.344222	2.64677e-28
			Phip	-0.365859	2.66734e-28
			Ctsl	-0.221516	3.0035e-28
			Eif4g3	-0.292853	3.01404e-28
			Atad2b	-0.366006	3.22565e-28
			Eri3	-0.408858	3.86112e-28
			B4galt1	-0.282757	4.35382e-28
			Zcchc7	-0.304438	4.52742e-28
			Pid1	-0.33194	5.25582e-28
			Ap1b1	-0.435969	5.36262e-28
			Arhgap25	-0.366375	5.39319e-28
			Chchd3	-0.386769	7.10933e-28
			Gfpt1	-0.444099	8.48492e-28
			Cd274	-0.476227	1.03118e-27
			Actr3	-0.248843	1.03713e-27
			Cpd	-0.490437	1.04347e-27
			Tent5c	-0.320967	1.15371e-27
			Znfx1	-0.379077	1.18031e-27
			Tnfaip8	-0.342936	1.24623e-27
			Tet2	-0.351623	1.24904e-27
			Sorl1	-0.511793	1.28748e-27
			Dstn	-0.342856	1.29956e-27
			Fcho2	-0.283402	1.38798e-27
			Mdm2	-0.444416	1.44066e-27
			Cox8a	-0.270657	1.51922e-27
			H2-Aa	-0.439512	1.60484e-27
			Arhgap22	-0.331184	1.67739e-27
			Bcas3	-0.349491	1.92451e-27
			Stk38l	-0.483317	1.96742e-27
			Mdm4	-0.389662	2.17413e-27
			Spop	-0.306969	2.21677e-27
			Rfc2	-0.447957	2.62132e-27
			Snrpg	-0.307512	2.66119e-27
			Arf3	-0.396156	2.83752e-27
			Max	-0.409047	3.53806e-27
			Usp15	-0.330051	3.66799e-27
			Tnfsf13b	-0.430098	3.77897e-27
			C2cd3	-0.483582	3.85908e-27
			Cnot6	-0.395214	4.00326e-27
			F11r	-0.244881	4.25769e-27
			Mgat4a	-0.255458	4.44155e-27
			Lat2	-0.350369	5.22463e-27
			Ube2l3	-0.318315	5.35517e-27
			Aif1	-0.257792	5.94235e-27
			Smchd1	-0.338155	6.21796e-27
			Tmed10	-0.257604	6.24199e-27
			Aftph	-0.289947	6.34966e-27
			Nfatc1	-0.385443	7.91924e-27
			Mbd5	-0.347668	8.1249e-27
			Rnf213	-0.406814	8.17378e-27
			Strn3	-0.314217	8.17378e-27
			Itch	-0.314935	8.46245e-27
			Gltp	-0.381298	9.54727e-27
			Rab5c	-0.3301	1.04646e-26
			Atp5l	-0.294447	1.04824e-26
			Sfi1	-0.514521	1.16297e-26
			P2ry6	-0.332165	1.16297e-26
			Slc12a6	-0.29926	1.16297e-26
			Serf2	-0.256305	1.21284e-26
			Ppp2r5c	-0.315805	1.21402e-26
			Atp6v0a2	-0.352202	1.26174e-26
			Ptms	-0.25452	1.40803e-26
			Pcbp2	-0.2525	1.82014e-26
			Ptpn18	-0.254744	2.35827e-26
			Tbck	-0.403174	2.40228e-26
			Larp1	-0.300471	2.41043e-26
			Parp14	-0.395357	2.45118e-26
			Amz1	-0.388866	2.56553e-26
			Itfg1	-0.435604	2.78191e-26
			Gng12	-0.341983	2.96059e-26
			Chd9	-0.233163	3.32166e-26
			Trpc4ap	-0.333925	3.58561e-26
			Bltp1	-0.358985	3.59463e-26
			Setd3	-0.331829	3.89735e-26
			Hltf	-0.405497	4.05967e-26
			Hck	-0.256684	4.10756e-26
			Ankrd44	-0.249776	4.50233e-26
			Naip2	-0.351329	5.13891e-26
			Vgll4	-0.308109	5.1625e-26
			Chst11	-0.440327	5.28908e-26
			Atp6v0c	-0.240373	5.30742e-26
			Ddx17	-0.325808	5.76422e-26
			Rab5if	-0.345069	5.85748e-26
			Rnf14	-0.48181	6.15034e-26
			Eif4b	-0.38322	6.21647e-26
			Nsf	-0.383491	6.26707e-26
			St3gal6	-0.265888	6.31453e-26
			Cttnbp2nl	-0.247002	6.51125e-26
			Prcp	-0.323709	6.7955e-26
			Sh3bp2	-0.416089	6.97277e-26
			Zfp608	-0.353033	6.99425e-26
			Lpin2	-0.297991	8.01323e-26
			Luc7l2	-0.230879	8.67514e-26
			Ppib	-0.25724	9.31145e-26
			Slc12a9	-0.378406	9.78121e-26
			Ecpas	-0.342065	1.02416e-25
			Scamp1	-0.370072	1.09511e-25
			Fam193a	-0.316016	1.12604e-25
			Prkcd	-0.267781	1.27056e-25
			Trak1	-0.366143	1.28272e-25
			H2aj	-0.4269	1.51417e-25
			Ttc28	-0.268056	1.53188e-25
			Rassf2	-0.339569	1.59212e-25
			Eef1g	-0.308409	1.6202e-25
			Il18bp	-0.546671	1.64863e-25
			Ubald2	-0.359359	1.64863e-25
			Gaa	-0.445281	1.78042e-25
			Zfas1	-0.362613	1.90799e-25
			Slc31a1	-0.37655	1.92484e-25
			Ywhae	-0.220157	1.93811e-25
			Lman2	-0.381151	2.06224e-25
			Vps13d	-0.375998	2.06978e-25
			Sppl3	-0.295935	2.16623e-25
			Marchf5	-0.373034	2.27718e-25
			Abi1	-0.275862	2.44853e-25
			Slc30a7	-0.409496	2.8635e-25
			Tspan14	-0.317797	3.84332e-25
			Cmtm7	-0.258907	3.93132e-25
			Eif3k	-0.30432	4.0533e-25
			Morc3	-0.310621	4.67471e-25
			Ptafr	-0.331465	4.68503e-25
			Mtmr6	-0.347755	4.96109e-25
			R3hdm1	-0.367893	5.50203e-25
			Tcn2	-0.292332	6.97547e-25
			Atp5c1	-0.296983	6.97592e-25
			Fndc3a	-0.30159	7.24842e-25
			Rnf149	-0.471996	7.36427e-25
			Sumf1	-0.429242	1.17188e-24
			Uty	-0.363572	1.26751e-24
			Sec61g	-0.281565	1.27256e-24
			Ash1l	-0.270806	1.27256e-24
			Nlrp1b	-0.324593	1.31404e-24
			Ppp1r21	-0.359758	1.32125e-24
			Sec14l1	-0.327595	1.32836e-24
			Arhgap4	-0.426045	1.54067e-24
			Grb2	-0.239717	1.61202e-24
			Glyr1	-0.352262	1.64319e-24
			Os9	-0.324966	2.11497e-24
			Fbxw4	-0.323409	2.14051e-24
			Pld3	-0.397957	2.15046e-24
			Ndufa1	-0.397007	2.27271e-24
			Mthfsl	-0.450115	2.37426e-24
			Gpatch2	-0.446851	2.37426e-24
			Atp5mpl	-0.33458	2.40317e-24
			Gnb1	-0.232546	2.6921e-24
			Gpatch8	-0.297945	2.76832e-24
			Cox7a2l	-0.248379	2.98189e-24
			Ccnt2	-0.377583	3.63416e-24
			Mxi1	-0.388886	4.17591e-24
			Cdk14	-0.332866	4.32054e-24
			Dapk1	-0.483684	4.32432e-24
			Npm1	-0.267877	4.42119e-24
			Ndufs3	-0.34726	5.02904e-24
			Wls	-0.34214	5.39135e-24
			Dapp1	-0.306033	5.61263e-24
			Wdr89	-0.446777	5.63224e-24
			Gpr107	-0.399233	5.92296e-24
			Btk	-0.346116	6.42245e-24
			Aagab	-0.42093	6.87315e-24
			Nadk	-0.376682	6.93015e-24
			Pik3cb	-0.352163	7.40861e-24
			Crebbp	-0.27142	7.44964e-24
			Ak2	-0.395951	7.50909e-24
			Stag1	-0.254319	7.6536e-24
			Uqcrh	-0.25511	8.01652e-24
			Capza1	-0.272	8.41748e-24
			Mrtfa	-0.340962	8.56173e-24
			Arpc1b	-0.221405	8.7607e-24
			Tcf20	-0.344845	9.89999e-24
			Nipbl	-0.234335	1.05277e-23
			Cmklr1	-0.406999	1.05362e-23
			Kxd1	-0.39798	1.05609e-23
			Plcb2	-0.458335	1.12967e-23
			Ncf2	-0.237456	1.2019e-23
			Zfp992	-0.461234	1.25505e-23
			Dock8	-0.238676	1.31905e-23
			Ndufv3	-0.357445	1.37228e-23
			Dync1i2	-0.303771	1.38764e-23
			Prune2	-0.467267	1.51249e-23
			Hps4	-0.28507	1.71448e-23
			Zfp207	-0.328052	1.86741e-23
			Tnrc18	-0.320497	2.02211e-23
			Csf2rb	-0.390363	2.04291e-23
			Thrap3	-0.275002	2.05252e-23
			Idnk	-0.403114	2.06024e-23
			Cep350	-0.351405	2.18858e-23
			Akap9	-0.329483	2.25084e-23
			Hsp90ab1	-0.233283	2.34415e-23
			Ttc14	-0.338731	2.34468e-23
			Tmem140	-0.440183	2.42566e-23
			Fkbp15	-0.30824	2.65006e-23
			Znrf1	-0.352162	2.69831e-23
			Fam172a	-0.267326	2.75722e-23
			Asph	-0.281837	2.77767e-23
			Leng8	-0.424677	2.77767e-23
			Gtdc1	-0.302418	2.77767e-23
			Vps41	-0.351532	3.0831e-23
			Tcf25	-0.279967	3.2061e-23
			Ccr5	-0.263458	3.44631e-23
			Nucb1	-0.322565	3.55573e-23
			Zfr	-0.279208	3.61265e-23
			Pycard	-0.251258	3.63686e-23
			Vdac2	-0.242008	3.83948e-23
			Bin2	-0.239052	3.9448e-23
			Canx	-0.22801	3.96438e-23
			Sppl2a	-0.27555	4.10709e-23
			Myl12b	-0.249607	4.1912e-23
			Tmem87b	-0.429522	4.58999e-23
			Btf3	-0.242496	4.6244e-23
			Tpi1	-0.439615	5.20252e-23
			Ppp4c	-0.367082	5.35742e-23
			Rnasek	-0.245844	5.39193e-23
			Tmco1	-0.309329	5.41344e-23
			Tm6sf1	-0.34763	5.89265e-23
			Bach2	-0.295681	6.10425e-23
			Tec	-0.293183	6.43965e-23
			Cnot4	-0.284704	7.12809e-23
			Gcnt2	-0.369004	7.30485e-23
			Hsd17b4	-0.377064	7.43312e-23
			Gnptab	-0.453486	7.64069e-23
			Galnt1	-0.294845	7.67661e-23
			Raf1	-0.411593	7.74607e-23
			Zup1	-0.348838	8.58319e-23
			Tbxas1	-0.284006	8.7946e-23
			Lcor	-0.302028	1.05779e-22
			Sp110	-0.344969	1.12582e-22
			Pkn1	-0.300844	1.19825e-22
			Ddhd1	-0.567558	1.20436e-22
			Nrros	-0.263558	1.23739e-22
			Cd68	-0.257677	1.30863e-22
			Cd37	-0.206706	1.3499e-22
			Cers6	-0.484462	1.42909e-22
			Aimp1	-0.365965	1.65671e-22
			Tet3	-0.31252	1.74408e-22
			Lmo4	-0.432226	1.74866e-22
			Rab7	-0.268721	1.83033e-22
			Mef2c	-0.215954	1.95792e-22
			Itgav	-0.307106	1.99019e-22
			Rpn2	-0.283428	2.02496e-22
			Atp1a1	-0.347965	2.06959e-22
			Tmcc3	-0.221353	2.11277e-22
			Ggh	-0.391153	2.1139e-22
			Rad51b	-0.351601	2.46759e-22
			Pla2g15	-0.26389	2.49965e-22
			Usp34	-0.281545	2.72775e-22
			Ppp1r12a	-0.242262	2.78073e-22
			Atp6v1c1	-0.279295	2.80692e-22
			Rsrp1	-0.227839	3.01858e-22
			Atf1	-0.378741	3.10844e-22
			Pomp	-0.253628	3.37676e-22
			Eif2ak2	-0.354739	3.56593e-22
			Rabgap1	-0.367388	3.63157e-22
			Itsn2	-0.281537	3.70948e-22
			Fryl	-0.339705	3.71154e-22
			Npepps	-0.327307	4.04877e-22
			Atp6v1b2	-0.337198	4.04877e-22
			Atp6ap2	-0.243013	4.23158e-22
			Soat1	-0.314245	4.46703e-22
			Rab8b	-0.23521	4.90694e-22
			Zc3hav1	-0.321676	4.97801e-22
			Hectd1	-0.303429	5.32377e-22
			Galk2	-0.39111	5.62196e-22
			Pdia4	-0.387071	5.73335e-22
			H2-Ab1	-0.391648	5.82398e-22
			Ccm2	-0.366074	6.4643e-22
			Ubl3	-0.245387	6.71116e-22
			Rplp2	-0.2146	6.95418e-22
			Adap2os	-0.308033	7.09147e-22
			Wrn	-0.442953	7.10973e-22
			Plekho1	-0.203108	7.35687e-22
			Tor3a	-0.37574	7.37996e-22
			Itpk1	-0.426336	7.38666e-22
			Pign	-0.386494	7.7356e-22
			Galnt10	-0.442502	7.84356e-22
			Sting1	-0.269751	7.97638e-22
			Atxn10	-0.31924	7.9875e-22
			Tmem184b	-0.362717	8.58694e-22
			Pum1	-0.265881	8.61898e-22
			Rgmb	-0.374296	9.26972e-22
			Rsrc1	-0.281027	9.60968e-22
			Gbp7	-0.395323	1.09665e-21
			Oxct1	-0.246641	1.12295e-21
			Mfsd1	-0.351806	1.13448e-21
			Tnfaip2	-0.508141	1.13722e-21
			Rufy3	-0.354449	1.18215e-21
			Nisch	-0.31508	1.22471e-21
			Selenow	-0.384514	1.36042e-21
			Ifi204	-0.320387	1.38806e-21
			Wdr7	-0.369893	1.47215e-21
			Carmil1	-0.522644	1.51876e-21
			Nmi	-0.419871	1.56565e-21
			Tnpo1	-0.267096	1.57301e-21
			Havcr2	-0.27938	1.78457e-21
			Ube2v1	-0.374839	1.84323e-21
			Mroh1	-0.404742	1.86578e-21
			Sfmbt1	-0.299607	1.88736e-21
			Cep192	-0.431624	2.0124e-21
			Dars	-0.419664	2.21566e-21
			Dnajc1	-0.287028	3.40217e-21
			Cfdp1	-0.360749	3.4095e-21
			Abl2	-0.291324	3.52227e-21
			Aco2	-0.373129	4.08303e-21
			Susd6	-0.25665	4.23791e-21
			Ostf1	-0.251581	4.3886e-21
			Coq10b	-0.293468	5.09709e-21
			Eif3m	-0.309601	5.10948e-21
			Sdhd	-0.394703	5.28459e-21
			Exoc2	-0.390095	5.29045e-21
			Plxdc1	-0.376175	5.63894e-21
			Akap10	-0.320428	5.77098e-21
			Zzz3	-0.402471	5.8145e-21
			Hat1	-0.421874	5.8902e-21
			Eif4ebp2	-0.385693	7.30316e-21
			Dtx3l	-0.381954	7.34255e-21
			Csk	-0.298469	7.50436e-21
			Entpd1	-0.250044	8.15631e-21
			Irf2	-0.226358	8.3191e-21
			Arhgef1	-0.367828	8.58877e-21
			Nup98	-0.262306	8.87488e-21
			Nsmce2	-0.313013	9.24054e-21
			Arid4a	-0.277049	9.30181e-21
			Znrf2	-0.288895	9.3161e-21
			Abcg1	-0.374342	9.56825e-21
			Crlf2	-0.364029	9.57579e-21
			Arl5a	-0.406433	9.93663e-21
			Rb1	-0.321511	1.09212e-20
			Slamf8	-0.441349	1.13075e-20
			Atox1	-0.245133	1.14748e-20
			Tomm7	-0.29823	1.16773e-20
			Psmb1	-0.275052	1.17563e-20
			Med13l	-0.273444	1.34291e-20
			Rapgef2	-0.307633	1.44838e-20
			Snx2	-0.281609	1.46253e-20
			Agps	-0.267926	1.64774e-20
			Mif	-0.378279	1.77888e-20
			Pim1	-0.413393	1.91052e-20
			Pet100	-0.411155	1.93039e-20
			Wdfy1	-0.341968	2.07393e-20
			Pacsin2	-0.297036	2.10775e-20
			Fuca2	-0.360536	2.11455e-20
			Stk4	-0.293197	2.14036e-20
			Gigyf2	-0.35124	2.2615e-20
			Stat2	-0.371316	2.27941e-20
			Trim35	-0.442919	2.4287e-20
			Cox7c	-0.237444	2.50559e-20
			P3h2	-0.290756	2.64946e-20
			Etnk1	-0.277277	2.79759e-20
			Snx20	-0.268398	2.88962e-20
			Lrrfip1	-0.261685	2.9379e-20
			Cacna1d	-0.272374	3.12405e-20
			Spsb1	-0.377884	3.19365e-20
			Kmt2a	-0.303453	3.2258e-20
			Sort1	-0.296615	3.23125e-20
			Rer1	-0.292579	3.345e-20
			Arhgef7	-0.425983	3.83807e-20
			Plbd2	-0.339819	3.93781e-20
			Selenof	-0.232948	4.13639e-20
			Usp40	-0.411112	4.62145e-20
			Fuca1	-0.287579	4.82746e-20
			Slc38a6	-0.458094	4.83594e-20
			Ube2b	-0.243307	4.8479e-20
			Rsbn1l	-0.258846	5.03699e-20
			Wapl	-0.25607	5.31001e-20
			Il2rg	-0.436006	5.62822e-20
			Akr1b10	-0.364122	5.93489e-20
			Fundc2	-0.425628	6.2158e-20
			BC035044	-0.393847	6.38945e-20
			Pum2	-0.248515	6.85411e-20
			Pgs1	-0.386542	7.06731e-20
			Tmem179b	-0.33933	7.24238e-20
			Ube2d3	-0.209289	7.43608e-20
			Mapre2	-0.288801	7.73928e-20
			Hcls1	-0.279924	7.93255e-20
			Cct4	-0.30285	8.21181e-20
			Pon3	-0.342517	8.85139e-20
			Sbf2	-0.262471	8.95088e-20
			Hnrnpm	-0.264234	8.97522e-20
			Luc7l3	-0.263338	9.25352e-20
			Tcirg1	-0.266498	9.30647e-20
			Zfyve26	-0.421639	9.50633e-20
			Acot9	-0.387052	9.54521e-20
			Med27	-0.424096	9.86348e-20
			Psma5	-0.331571	1.02614e-19
			Aopep	-0.327182	1.04134e-19
			Cln3	-0.363806	1.05678e-19
			Denr	-0.329164	1.05928e-19
			Cdk19	-0.283708	1.07028e-19
			Hvcn1	-0.301153	1.088e-19
			Gsk3b	-0.247637	1.15851e-19
			Taf15	-0.256986	1.22913e-19
			Lrp5	-0.355754	1.23087e-19
			Ust	-0.43586	1.25535e-19
			Cog5	-0.298067	1.27538e-19
			Nagk	-0.41796	1.28407e-19
			Hps3	-0.346518	1.38927e-19
			Stx7	-0.214569	1.49863e-19
			Klf13	-0.282175	1.57146e-19
			Prr14l	-0.314741	1.81589e-19
			Uggt1	-0.398269	1.92542e-19
			Ranbp2	-0.303456	1.94179e-19
			Aph1a	-0.349921	1.98998e-19
			Pold4	-0.275256	2.05118e-19
			Csde1	-0.239871	2.10006e-19
			C4b	-0.317831	2.23425e-19
			Pibf1	-0.346164	2.27384e-19
			Mrps9	-0.401067	2.30394e-19
			Ankrd13a	-0.312872	2.34286e-19
			Coa5	-0.405232	2.4075e-19
			Tial1	-0.332654	2.4188e-19
			Ncbp2as2	-0.375191	2.46978e-19
			Eya3	-0.425075	2.46978e-19
			Capns1	-0.290755	2.51033e-19
			Snx18	-0.253783	2.52925e-19
			Fcgrt	-0.337547	2.5602e-19
			Wdr33	-0.302399	2.90631e-19
			Crebrf	-0.300226	3.06964e-19
			Sh3pxd2a	-0.305497	3.31816e-19
			Specc1l	-0.404153	3.36101e-19
			Cyp4v3	-0.34447	3.51135e-19
			Herc1	-0.278828	3.62471e-19
			Sdccag8	-0.287367	3.63523e-19
			D8Ertd738e	-0.258674	3.70768e-19
			Plaur	-0.348123	3.70768e-19
			Asxl2	-0.290284	3.74367e-19
			Kdm7a	-0.279106	3.81274e-19
			Sgk3	-0.320081	4.35979e-19
			Slc7a7	-0.276989	4.56079e-19
			Ap3d1	-0.335737	4.64099e-19
			Virma	-0.404054	4.67387e-19
			Kdelr1	-0.3286	4.69535e-19
			Dnase2a	-0.28614	5.36094e-19
			Larp4b	-0.241748	5.80655e-19
			Ralgapa1	-0.311362	6.56955e-19
			Specc1	-0.245799	6.96102e-19
			Inpp5k	-0.405454	7.52758e-19
			Nub1	-0.316794	8.08369e-19
			Hspd1	-0.334768	8.08369e-19
			Mtch2	-0.34728	8.81562e-19
			Cox7a2	-0.265301	9.04041e-19
			Nktr	-0.228851	9.13531e-19
			Pip4k2a	-0.202724	9.29004e-19
			Nt5c2	-0.31472	9.42425e-19
			Snta1	-0.310005	9.44905e-19
			Anp32b	-0.3094	9.70471e-19
			Echs1	-0.355619	9.91134e-19
			Cwf19l2	-0.339409	1.01297e-18
			Trmt1l	-0.392791	1.04065e-18
			Crlf3	-0.230375	1.06397e-18
			Phkb	-0.34003	1.17201e-18
			Cog4	-0.406496	1.22512e-18
			Atxn7	-0.322945	1.22512e-18
			Daam1	-0.312483	1.24455e-18
			Cflar	-0.220396	1.27448e-18
			Ncoa3	-0.259398	1.31002e-18
			Peli2	-0.290286	1.31002e-18
			Tmem68	-0.385157	1.36845e-18
			Phf20	-0.289237	1.40813e-18
			Myadm	-0.402411	1.40813e-18
			Ep300	-0.259325	1.41507e-18
			Abl1	-0.312394	1.53699e-18
			Nek9	-0.397727	1.56522e-18
			Scfd1	-0.350644	1.57253e-18
			Fam107b	-0.410879	1.59532e-18
			Atg10	-0.300144	1.61e-18
			Cstb	-0.379637	1.63675e-18
			Vcpip1	-0.380032	1.63675e-18
			Bltp2	-0.401548	1.63864e-18
			Cdkal1	-0.293459	1.65672e-18
			Gak	-0.305654	1.73362e-18
			Eif3i	-0.311739	1.82043e-18
			Setd5	-0.246281	1.91172e-18
			Aatf	-0.345689	2.01854e-18
			Stip1	-0.38212	2.17117e-18
			Tcf7l2	-0.268185	2.23045e-18
			Abca9	-0.294788	2.37137e-18
			Trim25	-0.401519	2.37381e-18
			Rnf130	-0.207391	2.41782e-18
			Sgpp1	-0.44592	2.44952e-18
			Slc38a10	-0.318273	3.01355e-18
			Smyd3	-0.262292	3.04336e-18
			Disc1	-0.332471	3.17571e-18
			Cmc1	-0.374162	3.19884e-18
			Cpq	-0.290935	3.23413e-18
			Riok3	-0.34434	3.33287e-18
			Ndufa7	-0.265311	3.36994e-18
			Acvrl1	-0.418997	3.457e-18
			Plgrkt	-0.265288	3.70758e-18
			Nfatc2	-0.336612	3.74647e-18
			Ubr3	-0.295133	3.85923e-18
			Ccnt1	-0.296795	3.86045e-18
			Ogt	-0.291795	3.94286e-18
			Dnaja2	-0.270455	3.98716e-18
			Dennd6a	-0.342395	4.09345e-18
			Fam168a	-0.299451	4.13471e-18
			Mier1	-0.277862	4.19822e-18
			Baz2a	-0.383127	4.22793e-18
			Ifi35	-0.334717	4.4952e-18
			Washc2	-0.312167	4.70459e-18
			Arl8a	-0.295129	4.75552e-18
			Lpp	-0.274468	4.79428e-18
			Acap2	-0.218928	4.8682e-18
			Zfp638	-0.274237	5.06505e-18
			Trim12c	-0.353247	5.11625e-18
			Dbnl	-0.291036	5.39154e-18
			Chordc1	-0.354698	5.45192e-18
			Cndp2	-0.273392	5.76998e-18
			Pde4dip	-0.329889	5.78451e-18
			Baz2b	-0.233309	5.99301e-18
			Rffl	-0.243185	6.18816e-18
			Pikfyve	-0.406132	6.32461e-18
			Dnm2	-0.21628	6.70349e-18
			Pxk	-0.357948	6.99305e-18
			Gna12	-0.227902	7.09486e-18
			Ubap2l	-0.251117	7.29964e-18
			Supt20	-0.327945	7.30814e-18
			Ptpn12	-0.398286	7.43353e-18
			Rap2a	-0.332562	7.49172e-18
			Tbc1d23	-0.283794	7.66707e-18
			Atad1	-0.373187	7.91169e-18
			Nedd8	-0.257047	8.1988e-18
			Fggy	-0.408342	8.20455e-18
			Pigu	-0.405956	8.29911e-18
			Zmiz1	-0.210953	8.73803e-18
			Ergic1	-0.383212	8.75562e-18
			Myo9a	-0.264452	8.89222e-18
			Gtpbp2	-0.33759	9.06419e-18
			Cbfb	-0.303107	9.27155e-18
			St13	-0.233177	9.36752e-18
			Dynll1	-0.266851	9.72287e-18
			Mllt3	-0.425951	9.84993e-18
			Arpc3	-0.200944	1.04402e-17
			Erp44	-0.348725	1.06766e-17
			Adam9	-0.381395	1.13664e-17
			Fam120a	-0.317805	1.21915e-17
			Akr1b3	-0.320452	1.22309e-17
			Clec2d	-0.344275	1.24334e-17
			Psen1	-0.321459	1.26819e-17
			Snx13	-0.28239	1.33299e-17
			Nsd2	-0.415077	1.34104e-17
			Ccar1	-0.311091	1.38797e-17
			Map4	-0.222765	1.41124e-17
			Zfp277	-0.327503	1.46191e-17
			Gng5	-0.21049	1.53331e-17
			Trim5	-0.389777	1.54996e-17
			Cers5	-0.393498	1.54996e-17
			Atg16l1	-0.398469	1.60823e-17
			Aup1	-0.283998	1.7809e-17
			Ets2	-0.340091	1.79271e-17
			Slc15a3	-0.257994	1.89061e-17
			Nol4l	-0.376493	2.01449e-17
			Trit1	-0.387588	2.04283e-17
			Large1	-0.217691	2.06999e-17
			Fam222b	-0.3457	2.07548e-17
			Mthfs	-0.294021	2.07629e-17
			Ncoa1	-0.286353	2.08492e-17
			Rab2a	-0.205851	2.15019e-17
			Ddx39b	-0.265053	2.22302e-17
			Tra2a	-0.202596	2.24278e-17
			Pgam1	-0.311355	2.4339e-17
			Anxa7	-0.376798	2.50091e-17
			Atp5b	-0.229404	2.51365e-17
			Rasgef1b	-0.266173	2.57445e-17
			Epb41	-0.290573	2.72049e-17
			Gbf1	-0.282468	2.76818e-17
			Ap2b1	-0.2536	2.82267e-17
			Cox6b1	-0.2405	2.87495e-17
			Marchf7	-0.250873	2.88952e-17
			Selenot	-0.279161	3.03248e-17
			Ago3	-0.261409	3.09432e-17
			Eif5b	-0.243482	3.1866e-17
			Ost4	-0.277453	3.26146e-17
			Tkt	-0.289104	3.53104e-17
			Ppig	-0.252947	3.61861e-17
			Pigk	-0.35482	3.66554e-17
			Eps15l1	-0.343604	4.4597e-17
			Ppp6r3	-0.259825	4.66196e-17
			Slc29a3	-0.219498	4.78334e-17
			Elavl1	-0.260916	4.94754e-17
			Got1	-0.344996	5.01299e-17
			Anapc11	-0.322036	5.12282e-17
			Ube4b	-0.38493	5.13768e-17
			Ndufa2	-0.250722	5.21359e-17
			Abhd17c	-0.352684	5.44877e-17
			Tbk1	-0.280181	5.59982e-17
			Gal3st4	-0.279075	5.68016e-17
			Hmbox1	-0.329453	5.93435e-17
			Xrn1	-0.294005	5.97782e-17
			Manba	-0.388177	6.20628e-17
			Nop10	-0.328719	6.24684e-17
			Pcmtd1	-0.265088	6.29304e-17
			Smg1	-0.232759	6.29809e-17
			Abcf1	-0.297029	6.66168e-17
			Ubtd1	-0.29895	6.69895e-17
			Iqsec2	-0.346828	7.24631e-17
			Mms19	-0.326828	7.3708e-17
			Atf7	-0.276082	7.53879e-17
			Lncpint	-0.254248	8.01356e-17
			Arl15	-0.249377	8.10223e-17
			Tspan13	-0.283727	8.12739e-17
			Sec24b	-0.324858	8.12739e-17
			Ubac2	-0.284194	8.14183e-17
			Cd2ap	-0.229842	8.33533e-17
			Fcgr4	-0.342653	8.52077e-17
			Ankle2	-0.332239	8.99659e-17
			Csnk1g1	-0.29411	9.14364e-17
			Plekhf2	-0.298512	9.29641e-17
			Ogfr	-0.339741	9.4391e-17
			Pip5k1c	-0.336143	9.56616e-17
			Ccpg1	-0.332757	9.77306e-17
			Kcmf1	-0.259245	1.00152e-16
			Atg5	-0.28899	1.01506e-16
			Jade2	-0.339019	1.01702e-16
			Cdc73	-0.324679	1.09405e-16
			Dock10	-0.203195	1.12019e-16
			Mau2	-0.351097	1.13976e-16
			Jarid2	-0.312044	1.25149e-16
			Rab10	-0.240402	1.27553e-16
			Oxa1l	-0.361164	1.28132e-16
			Odf2	-0.382794	1.29784e-16
			Uqcr10	-0.291812	1.38256e-16
			Wwp2	-0.272308	1.476e-16
			Pdia6	-0.249411	1.49589e-16
			Bcl6	-0.257164	1.50158e-16
			Ogdh	-0.284523	1.5204e-16
			Med1	-0.314872	1.54799e-16
			Peds1	-0.340142	1.59514e-16
			Fxr1	-0.27812	1.63764e-16
			Babam2	-0.245975	1.73959e-16
			Spcs1	-0.247519	1.75003e-16
			Ptbp2	-0.29395	1.807e-16
			Acsl5	-0.36239	1.8701e-16
			Ankrd17	-0.231497	1.89062e-16
			Ube2w	-0.315293	1.97078e-16
			Mrps21	-0.306042	2.02064e-16
			Kcnma1	-0.337288	2.07779e-16
			Rc3h2	-0.3372	2.15688e-16
			Cnot3	-0.375317	2.2375e-16
			Hivep2	-0.339592	2.24886e-16
			Arhgdia	-0.212871	2.26479e-16
			Cst7	-0.419506	2.37162e-16
			Tnfsf12	-0.380273	2.37162e-16
			Traf5	-0.298055	2.61286e-16
			Myo1c	-0.331586	2.63377e-16
			Tuba1b	-0.21761	2.7958e-16
			Nap1l1	-0.317501	2.85218e-16
			Pik3ca	-0.325617	2.95597e-16
			Sgce	-0.32389	3.04755e-16
			Plekhm2	-0.234194	3.134e-16
			Rnf114	-0.300404	3.28174e-16
			Tbc1d10a	-0.285706	3.43913e-16
			Pld1	-0.24789	3.44747e-16
			Ly9	-0.370465	3.50334e-16
			Ascc3	-0.245235	3.56875e-16
			Map3k5	-0.275908	3.64378e-16
			Faf2	-0.331092	3.71548e-16
			Iigp1	-0.517509	3.72516e-16
			Pigt	-0.36476	3.74027e-16
			Lrrfip2	-0.353711	3.85556e-16
			Sumo1	-0.230907	3.88328e-16
			Pik3cd	-0.269519	3.95528e-16
			Ppp4r3a	-0.318949	3.97227e-16
			Spg21	-0.312515	4.01741e-16
			Tbcd	-0.358556	4.4077e-16
			Ube2e1	-0.280419	4.42398e-16
			Ptpre	-0.245849	4.71972e-16
			Mapkap1	-0.305755	4.7431e-16
			Dtnbp1	-0.253368	4.75059e-16
			Bax	-0.286505	4.78553e-16
			Scaf8	-0.27847	4.8344e-16
			Mbtd1	-0.273807	4.9193e-16
			Romo1	-0.306058	5.59022e-16
			R3hdm2	-0.263902	5.6048e-16
			Plod3	-0.320585	5.66657e-16
			Uqcrq	-0.258855	5.70667e-16
			Psmd14	-0.312706	5.85633e-16
			Ergic3	-0.246685	5.86381e-16
			Irgm2	-0.386134	6.20274e-16
			Tubb5	-0.220596	6.63691e-16
			Wdr70	-0.344192	6.67935e-16
			Anapc13	-0.30404	6.90653e-16
			Eef1d	-0.215002	6.99687e-16
			Rragc	-0.278216	7.38278e-16
			Gapvd1	-0.245369	7.49071e-16
			Aamp	-0.280456	7.93432e-16
			Chuk	-0.355133	8.35504e-16
			Pank2	-0.345173	8.61075e-16
			Kidins220	-0.314871	8.65897e-16
			Tns1	-0.291698	8.71613e-16
			Nudt9	-0.323931	8.86497e-16
			Tor1aip2	-0.275115	8.92555e-16
			Uba52	-0.200942	9.12528e-16
			Arhgap15	-0.327288	9.35036e-16
			Rbms1	-0.354596	9.45222e-16
			Tapbpl	-0.348817	9.79471e-16
			Ap2m1	-0.297198	1.02783e-15
			Sp100	-0.267085	1.02828e-15
			Armh3	-0.320767	1.02973e-15
			Micu2	-0.357319	1.02996e-15
			Ube2j1	-0.253844	1.03325e-15
			Ilrun	-0.274485	1.0513e-15
			Arhgef2	-0.27173	1.05269e-15
			BC004004	-0.337634	1.09727e-15
			Hprt	-0.248925	1.11709e-15
			Vps13a	-0.335389	1.19292e-15
			Ftl1-ps1	-0.367484	1.20982e-15
			Thada	-0.271964	1.22472e-15
			Glul	-0.235858	1.23039e-15
			Copz1	-0.330447	1.24512e-15
			Rab3gap1	-0.277964	1.28223e-15
			Plekha2	-0.343144	1.2927e-15
			Safb	-0.335197	1.4305e-15
			Tmem128	-0.299175	1.45173e-15
			Flnb	-0.393621	1.47014e-15
			Setd2	-0.244061	1.47428e-15
			Ubr2	-0.286435	1.50615e-15
			Prelid1	-0.319769	1.51621e-15
			Taldo1	-0.233812	1.51649e-15
			Maea	-0.352048	1.5377e-15
			Arap1	-0.313334	1.5874e-15
			Snf8	-0.303903	1.61585e-15
			Csnk1d	-0.269231	1.65502e-15
			Sik3	-0.235487	1.65502e-15
			Gtf2h2	-0.243249	1.71726e-15
			Sla	-0.306707	1.73194e-15
			Usp36	-0.348591	1.76442e-15
			Prdx5	-0.249991	1.80447e-15
			Celf1	-0.218072	1.83867e-15
			Kdm3b	-0.290601	1.84379e-15
			Elf4	-0.251873	2.05347e-15
			Rpn1	-0.334705	2.10609e-15
			Ctdnep1	-0.307122	2.11218e-15
			Tomm6	-0.259088	2.34585e-15
			Pde4b	-0.290587	2.37648e-15
			Sgms1	-0.328587	2.44626e-15
			Tmcc1	-0.242251	2.49121e-15
			Ehmt1	-0.313467	2.54798e-15
			Fes	-0.317829	2.5485e-15
			Rab3il1	-0.227154	2.60313e-15
			Tmem256	-0.296895	2.7226e-15
			Ube3c	-0.31398	2.73267e-15
			Pkib	-0.346617	2.78601e-15
			Cs	-0.339148	2.80676e-15
			Clptm1l	-0.315432	2.8446e-15
			Nup214	-0.324669	2.88922e-15
			Birc3	-0.254734	2.9002e-15
			Rnf145	-0.35598	2.96651e-15
			Slc2a1	-0.328728	3.02527e-15
			Wdr43	-0.314881	3.06161e-15
			Hnrnpul1	-0.250169	3.09034e-15
			Safb2	-0.282467	3.13601e-15
			Tmem167	-0.290793	3.21511e-15
			Numa1	-0.279778	3.29289e-15
			Vta1	-0.311931	3.37978e-15
			Slc30a9	-0.339438	3.38306e-15
			Il13ra1	-0.275236	3.6482e-15
			Alkbh1	-0.320703	3.64933e-15
			Ahcyl1	-0.332323	3.6657e-15
			Ccnl2	-0.264547	3.84617e-15
			Psme4	-0.232476	3.90772e-15
			Pik3c2a	-0.313995	4.15855e-15
			Cep43	-0.309421	4.18019e-15
			Tle5	-0.275485	4.48235e-15
			Ube2j2	-0.304838	4.864e-15
			Dcaf8	-0.295757	5.07683e-15
			Tmem168	-0.336993	5.34542e-15
			Neat1	-0.281314	5.42937e-15
			Apc	-0.230553	5.48067e-15
			Hnrnpll	-0.352062	5.55011e-15
			Sfswap	-0.328245	5.63037e-15
			Arpp19	-0.262107	5.75885e-15
			Pi4k2a	-0.310183	5.80374e-15
			Atp1b3	-0.238433	5.8747e-15
			Txndc11	-0.326638	6.18316e-15
			Ptpra	-0.202862	6.59821e-15
			Arpc5	-0.221657	6.6885e-15
			Slc43a2	-0.334818	7.10318e-15
			Mapkapk3	-0.331714	7.24855e-15
			Rabep1	-0.233837	7.29751e-15
			Il18	-0.261494	7.31702e-15
			Abhd16a	-0.325649	7.38629e-15
			Tmem50b	-0.314317	7.6211e-15
			Stk3	-0.285461	7.98486e-15
			Acin1	-0.234546	8.03724e-15
			Cass4	-0.34857	8.04992e-15
			Ythdf3	-0.231739	8.09089e-15
			Psmd13	-0.302083	8.1787e-15
			Gfm2	-0.366196	8.39091e-15
			Ss18	-0.297078	8.67898e-15
			Zfp106	-0.274446	8.75181e-15
			Svbp	-0.308198	8.80069e-15
			Rabgef1	-0.258819	8.82754e-15
			Usp37	-0.356661	8.96047e-15
			Tmem258	-0.268134	9.984e-15
			Smarcc2	-0.296539	1.0119e-14
			Wdr37	-0.28225	1.07563e-14
			Rlf	-0.24812	1.0881e-14
			Knop1	-0.319361	1.12436e-14
			Fkbp5	-0.277157	1.14437e-14
			Ccdc50	-0.223518	1.16889e-14
			Prpf40a	-0.226124	1.17327e-14
			Fblim1	-0.340795	1.19847e-14
			Ubr4	-0.303902	1.20026e-14
			Cnot1	-0.275666	1.21307e-14
			Rab12	-0.29581	1.2206e-14
			Nt5c	-0.350508	1.31528e-14
			Tpst2	-0.205517	1.3214e-14
			Nfatc3	-0.317214	1.33897e-14
			Cacnb2	-0.232394	1.34821e-14
			Lipa	-0.298898	1.38038e-14
			Psma7	-0.23404	1.38593e-14
			Arglu1	-0.22723	1.4695e-14
			Elk4	-0.318943	1.46995e-14
			Srp14	-0.244492	1.47265e-14
			Myo5a	-0.33218	1.51524e-14
			Epb41l4aos	-0.341571	1.59989e-14
			Phb2	-0.279865	1.6106e-14
			Bclaf1	-0.226281	1.64959e-14
			Nono	-0.272373	1.66041e-14
			Atp5j2	-0.231177	1.7372e-14
			Eefsec	-0.337785	1.74994e-14
			Itpripl2	-0.32065	1.80135e-14
			Uap1	-0.345184	1.81831e-14
			Tasor2	-0.314969	1.83217e-14
			Rc3h1	-0.261333	1.84709e-14
			Cpsf6	-0.233016	1.84769e-14
			Chic2	-0.247512	1.93087e-14
			Atp6v1h	-0.300466	1.96721e-14
			Mfsd11	-0.337219	1.9817e-14
			Snx24	-0.205192	2.03077e-14
			Med14	-0.371265	2.03227e-14
			Zfp451	-0.363006	2.03528e-14
			Tbl1x	-0.234111	2.10736e-14
			Rab40c	-0.334587	2.42596e-14
			Ndufa12	-0.305884	2.42995e-14
			Tbc1d1	-0.316875	2.43511e-14
			Polr1d	-0.232548	2.48379e-14
			Slc6a6	-0.2202	2.50805e-14
			Mlph	-0.317961	2.51431e-14
			Wtap	-0.29147	2.516e-14
			Eif4g1	-0.248971	2.53729e-14
			Nagpa	-0.309402	2.71579e-14
			Slx4ip	-0.346456	2.79177e-14
			Arf5	-0.220021	2.82414e-14
			Kcnk13	-0.234115	2.9361e-14
			Dym	-0.314776	2.9361e-14
			Csad	-0.320888	3.00848e-14
			Gsdmd	-0.270679	3.05318e-14
			Tm9sf4	-0.308447	3.07173e-14
			ENSMUSG00000121485	-0.322969	3.1656e-14
			Mtmr3	-0.229156	3.17929e-14
			Ttc7	-0.308287	3.30624e-14
			Pgap2	-0.311041	3.52607e-14
			Stx18	-0.314894	3.53523e-14
			Dnaja1	-0.25855	3.60722e-14
			Glrx3	-0.2977	3.60994e-14
			Dcun1d5	-0.249221	3.63471e-14
			Pcca	-0.281824	3.69436e-14
			Smim29	-0.320779	3.73636e-14
			Stag2	-0.233012	3.88974e-14
			Nemf	-0.291887	4.02534e-14
			Elf2	-0.215768	4.04989e-14
			Tpr	-0.221624	4.22581e-14
			Uqcr11	-0.243251	4.44871e-14
			Rgl1	-0.250553	4.60217e-14
			St3gal3	-0.275367	4.62628e-14
			Kcnk6	-0.278724	4.71846e-14
			Prr13	-0.280268	5.13131e-14
			Ufd1	-0.350276	5.13362e-14
			Twf1	-0.342953	5.17711e-14
			Cox6c	-0.212352	5.30958e-14
			Tep1	-0.320591	5.31384e-14
			Use1	-0.254496	5.48268e-14
			Mcmbp	-0.298955	5.48532e-14
			Upf2	-0.309463	5.48532e-14
			Tubgcp5	-0.298407	5.51779e-14
			Ylpm1	-0.318507	5.71352e-14
			Snrpb2	-0.296879	5.9059e-14
			Fam167b	-0.313383	5.91381e-14
			Washc3	-0.337702	6.22612e-14
			As3mt	-0.345214	6.41092e-14
			Ubl5	-0.216021	6.45875e-14
			Kdm4c	-0.291517	6.50578e-14
			Tmem87a	-0.351539	6.7059e-14
			Rsf1	-0.239838	6.88853e-14
			Ncf1	-0.208472	6.90117e-14
			Ccdc88a	-0.308698	6.96943e-14
			Sltm	-0.252271	6.98731e-14
			Rcbtb2	-0.251999	7.11514e-14
			Cd82	-0.267828	7.38111e-14
			Casc3	-0.278813	7.69681e-14
			Mien1	-0.311825	8.05205e-14
			Scn1b	-0.294857	8.23755e-14
			Leprot	-0.250661	8.69073e-14
			Relb	-0.243863	8.73658e-14
			Apbb2	-0.2444	8.96118e-14
			Il15	-0.363731	9.03417e-14
			Gpr108	-0.322313	9.06427e-14
			Ms4a6d	-0.268689	9.11239e-14
			Hnrnpl	-0.240188	1.00073e-13
			Nme2	-0.211226	1.02204e-13
			Atpif1	-0.215722	1.04108e-13
			Sdhb	-0.245077	1.05486e-13
			Slf2	-0.273274	1.05977e-13
			Gars	-0.319163	1.13895e-13
			Suclg2	-0.249323	1.14326e-13
			Pfkl	-0.323468	1.14375e-13
			Braf	-0.221436	1.24549e-13
			Rasal3	-0.277841	1.264e-13
			Snx1	-0.282215	1.30654e-13
			Dusp12	-0.330476	1.34142e-13
			Trip11	-0.27222	1.40953e-13
			Gng2	-0.208376	1.43749e-13
			Mfhas1	-0.279859	1.47142e-13
			Zmym4	-0.292104	1.49834e-13
			Tomm70a	-0.318116	1.6041e-13
			Atp6v1f	-0.206422	1.7649e-13
			Atp6v1d	-0.245015	1.78655e-13
			Depdc5	-0.326214	1.84816e-13
			Dop1b	-0.292175	1.85867e-13
			Rbm5	-0.220427	1.891e-13
			Zfp385a	-0.277913	1.96723e-13
			Atp6v1e1	-0.229421	2.06106e-13
			Ndufa13	-0.226102	2.18955e-13
			Fkbp8	-0.260754	2.19799e-13
			Mospd2	-0.322694	2.23057e-13
			Scaf4	-0.278586	2.25965e-13
			Ctbs	-0.325125	2.42246e-13
			Fbxo42	-0.319117	2.44094e-13
			Tnfrsf1a	-0.244	2.49447e-13
			Phf20l1	-0.215099	2.50205e-13
			Med15	-0.320042	2.61733e-13
			Hspa4	-0.20889	2.71404e-13
			Arih2	-0.231223	2.80486e-13
			Kif13b	-0.249033	2.82538e-13
			Tiam1	-0.325467	2.84143e-13
			Dync1h1	-0.233379	2.90868e-13
			Derl1	-0.228734	3.01555e-13
			Caprin1	-0.208716	3.03734e-13
			Zfp182	-0.330912	3.08475e-13
			Pphln1	-0.319669	3.11687e-13
			Abcc5	-0.261142	3.11711e-13
			Lacc1	-0.217902	3.15616e-13
			Krit1	-0.309969	3.2064e-13
			Sel1l	-0.274647	3.26336e-13
			Sod2	-0.325805	3.30077e-13
			Cct7	-0.262766	3.40591e-13
			Snx27	-0.32902	3.48987e-13
			Blvrb	-0.301443	3.48987e-13
			Tmem234	-0.217611	3.50896e-13
			Alas1	-0.304162	3.52199e-13
			Ndufb5	-0.246142	3.56165e-13
			Ext1	-0.243893	3.67175e-13
			Tbc1d9b	-0.266871	3.73829e-13
			Napa	-0.265953	3.83508e-13
			Ing4	-0.321667	3.89276e-13
			Ppp1ca	-0.210713	3.93812e-13
			Fam53b	-0.316158	3.98017e-13
			Adipor1	-0.217232	3.99703e-13
			Zkscan3	-0.287836	4.03385e-13
			Fkbp1a	-0.27037	4.06458e-13
			Psmb2	-0.224428	4.13744e-13
			Nhlrc2	-0.316232	4.25683e-13
			Sri	-0.262249	4.26002e-13
			Senp5	-0.331335	4.31279e-13
			Inpp4a	-0.309124	4.32967e-13
			Lmbrd1	-0.240934	4.35106e-13
			Rab20	-0.238117	4.41338e-13
			Phactr4	-0.356906	4.60331e-13
			Pnn	-0.26549	4.67702e-13
			Taok1	-0.217409	4.97886e-13
			Scaper	-0.255527	5.12155e-13
			Gnpda1	-0.328181	5.35107e-13
			Brd7	-0.276194	5.37328e-13
			Ube4a	-0.328409	5.4055e-13
			Erap1	-0.316168	5.4055e-13
			Dhdds	-0.342092	5.4055e-13
			Nop53	-0.281924	5.55599e-13
			Snrpe	-0.250456	5.64672e-13
			Anapc5	-0.288324	5.84783e-13
			Immt	-0.268334	5.8547e-13
			Strada	-0.265849	5.86927e-13
			Tmem165	-0.283854	5.95303e-13
			Usp47	-0.265358	6.07793e-13
			Tlr4	-0.33817	6.29997e-13
			Gon4l	-0.291467	6.78385e-13
			Psmg4	-0.318883	6.93267e-13
			Tnks2	-0.213756	7.0334e-13
			Stmp1	-0.311049	7.35167e-13
			Efr3a	-0.263901	7.45642e-13
			Ppfibp2	-0.351695	7.73611e-13
			Dennd1c	-0.296587	7.80771e-13
			Ranbp9	-0.249632	7.87028e-13
			Unk	-0.304656	7.87221e-13
			Glg1	-0.253975	8.20682e-13
			Zfp710	-0.204409	8.30951e-13
			Uqcrc2	-0.265735	8.30951e-13
			Bag1	-0.223653	8.42384e-13
			Fnbp4	-0.280815	8.46607e-13
			Lpgat1	-0.279707	8.47979e-13
			Usp4	-0.308721	8.84296e-13
			Fbxw7	-0.251242	8.96562e-13
			Cebpa	-0.221888	8.96766e-13
			Tifab	-0.286521	9.00632e-13
			Derl2	-0.271609	9.10105e-13
			Arhgap30	-0.219788	9.28527e-13
			Exoc6b	-0.243204	9.30037e-13
			Ppp6c	-0.262353	9.48216e-13
			Eps15	-0.270478	9.59382e-13
			St6gal1	-0.283277	9.65021e-13
			Ptpa	-0.27876	9.8508e-13
			Babam1	-0.317797	1.03429e-12
			Gba	-0.327902	1.06643e-12
			Tma7	-0.218822	1.07137e-12
			Ssbp2	-0.240611	1.07137e-12
			Fam120b	-0.286315	1.08235e-12
			Pon2	-0.249043	1.14892e-12
			Otud5	-0.307575	1.15211e-12
			Copa	-0.225766	1.21022e-12
			Cdk2ap2	-0.259809	1.2392e-12
			Ahsa1	-0.3072	1.27184e-12
			Osbpl1a	-0.287744	1.3252e-12
			Szrd1	-0.26299	1.3402e-12
			Vps50	-0.336746	1.34777e-12
			Atp5md	-0.240897	1.37073e-12
			Phf3	-0.23739	1.38911e-12
			Marchf2	-0.321034	1.41989e-12
			Zcchc2	-0.334211	1.43629e-12
			Psma1	-0.236497	1.50227e-12
			Map3k1	-0.238925	1.59172e-12
			Zfc3h1	-0.263733	1.60218e-12
			Vapb	-0.313781	1.70852e-12
			Txn2	-0.294466	1.79095e-12
			Cdyl	-0.313009	1.82524e-12
			Ddx10	-0.309861	1.84408e-12
			Ralgps1	-0.293961	1.85662e-12
			Diaph1	-0.318449	1.90661e-12
			Clec4a3	-0.303837	1.93684e-12
			Prpf39	-0.284686	1.94728e-12
			Taf10	-0.255762	1.95627e-12
			Ikbkb	-0.258265	1.98383e-12
			Prdm1	-0.357364	2.00313e-12
			Cisd2	-0.251458	2.12996e-12
			Ipcef1	-0.316006	2.14537e-12
			Atp5pb	-0.20125	2.17922e-12
			Pex14	-0.29253	2.18207e-12
			Dnajb11	-0.263664	2.40697e-12
			Ugcg	-0.305639	2.41669e-12
			Cdk13	-0.219535	2.62501e-12
			Cmpk1	-0.251207	2.65903e-12
			BC028528	-0.289744	2.68173e-12
			Ist1	-0.298966	2.70581e-12
			Phc2	-0.209324	2.72524e-12
			Slc25a39	-0.298244	2.79728e-12
			Ctnnb1	-0.222765	2.79728e-12
			Hs2st1	-0.260309	2.82083e-12
			Pdcd6ip	-0.235916	2.88334e-12
			Plekhj1	-0.263676	2.93383e-12
			Pias2	-0.264435	2.99527e-12
			Tmx3	-0.283608	3.00394e-12
			Nrbp1	-0.275901	3.01202e-12
			Tmem219	-0.240677	3.09186e-12
			Ly96	-0.30598	3.16311e-12
			Ppil2	-0.279023	3.19484e-12
			Lpcat1	-0.281498	3.30449e-12
			Zc3h13	-0.266685	3.32848e-12
			Atp5j	-0.206119	3.36108e-12
			Insig2	-0.295728	3.36108e-12
			Ppp2r5e	-0.2772	3.3886e-12
			Dcaf12	-0.274692	3.47961e-12
			Golgb1	-0.229415	3.62562e-12
			Timm10b	-0.226105	3.64386e-12
			Cers2	-0.280142	3.68288e-12
			Dpm1	-0.23863	3.83235e-12
			Cdk2ap1	-0.268477	3.95919e-12
			Scamp3	-0.28382	4.05984e-12
			Srsf4	-0.295395	4.12742e-12
			Copb1	-0.232336	4.12815e-12
			Sbno2	-0.265058	4.17706e-12
			Mta3	-0.313758	4.44852e-12
			Ddost	-0.228432	4.46274e-12
			Pds5a	-0.223634	4.48451e-12
			Serp1	-0.210984	4.54182e-12
			Tmed7	-0.232387	4.58838e-12
			Rin2	-0.201344	4.7236e-12
			Plekhm3	-0.234334	4.74308e-12
			Epb41l3	-0.306244	4.74308e-12
			Zyg11b	-0.263291	4.79276e-12
			Dcaf5	-0.278221	4.90128e-12
			Hcfc1r1	-0.282323	5.15204e-12
			Icosl	-0.304468	5.40182e-12
			Avl9	-0.271149	5.55851e-12
			Fgfr2	-0.275755	5.86027e-12
			Ndufc1	-0.276885	5.86265e-12
			Golga4	-0.264292	5.86588e-12
			Vps8	-0.286697	5.86588e-12
			Rtn4rl1	-0.225108	5.94325e-12
			Adrb2	-0.254359	6.10094e-12
			Ube2m	-0.255761	6.2914e-12
			Stk10	-0.231251	6.29589e-12
			Cnih4	-0.256044	6.30783e-12
			Sil1	-0.3111	6.41433e-12
			Arhgap12	-0.224562	6.49392e-12
			Tmpo	-0.285785	6.69627e-12
			Fgfr1op2	-0.24435	7.02577e-12
			Actn4	-0.290618	7.05053e-12
			Sys1	-0.243989	7.06089e-12
			Xpr1	-0.241086	7.10695e-12
			Nrf1	-0.256311	7.11983e-12
			Clcc1	-0.311622	7.23898e-12
			Ube2g2	-0.311198	7.26223e-12
			Rigi	-0.312295	7.54883e-12
			Fam32a	-0.285955	7.75214e-12
			Tnip2	-0.28955	7.89518e-12
			Elovl1	-0.298285	7.9256e-12
			Ggta1	-0.290637	8.22566e-12
			Kif13a	-0.30137	8.65156e-12
			Slc38a1	-0.277922	8.80832e-12
			Sdf2	-0.270232	9.08878e-12
			Pals2	-0.256638	9.43512e-12
			St7l	-0.340942	9.63492e-12
			Ndufs4	-0.242291	1.00743e-11
			Stard3nl	-0.224565	1.01632e-11
			Oga	-0.251238	1.02307e-11
			Nbas	-0.308989	1.05938e-11
			Sec61a1	-0.284256	1.09657e-11
			Cradd	-0.248866	1.15969e-11
			Sec61b	-0.205333	1.19291e-11
			Rnf111	-0.228109	1.19535e-11
			Sdhc	-0.271189	1.30618e-11
			Elovl5	-0.349539	1.30826e-11
			Dlg1	-0.240555	1.35686e-11
			Ncor2	-0.266039	1.42121e-11
			Copg2	-0.266683	1.4425e-11
			Resf1	-0.231666	1.46241e-11
			Sarnp	-0.220636	1.48251e-11
			Egr2	-0.301654	1.5611e-11
			Mvb12b	-0.210677	1.6672e-11
			Tm2d1	-0.248629	1.67388e-11
			Slc35b1	-0.301529	1.70574e-11
			Nploc4	-0.310557	1.72042e-11
			Tnks	-0.252265	1.75217e-11
			Clic4	-0.26739	1.79012e-11
			Psma2	-0.228836	1.81677e-11
			Usp48	-0.291726	1.82737e-11
			B3gnt2	-0.220858	1.85818e-11
			Cdc42se2	-0.239989	1.87655e-11
			Aak1	-0.259245	1.92843e-11
			Renbp	-0.233634	1.93724e-11
			Snapc1	-0.298574	2.02356e-11
			Tmem123	-0.314658	2.04691e-11
			Frs2	-0.269626	2.05019e-11
			Ncf4	-0.25399	2.06572e-11
			Lrp6	-0.258301	2.08999e-11
			Cpsf3	-0.286658	2.14129e-11
			Btrc	-0.301488	2.14324e-11
			Mtch1	-0.206824	2.15382e-11
			Immp2l	-0.251459	2.15382e-11
			Cyb5r4	-0.307133	2.15382e-11
			Parp8	-0.216884	2.15382e-11
			Gbp5	-0.389777	2.21422e-11
			Dctn4	-0.22449	2.24354e-11
			Atp5d	-0.202852	2.25329e-11
			Naglu	-0.257345	2.29318e-11
			Cox17	-0.220073	2.34625e-11
			Ccny	-0.24788	2.40333e-11
			Srpk2	-0.242469	2.40483e-11
			Ms4a6b	-0.285827	2.40787e-11
			Srcap	-0.27125	2.45598e-11
			Pgd	-0.261245	2.47542e-11
			Ldah	-0.314419	2.51882e-11
			Pggt1b	-0.299382	2.549e-11
			Rasa1	-0.24304	2.55084e-11
			Fut8	-0.290063	2.61328e-11
			Impdh2	-0.304959	2.71252e-11
			Rnh1	-0.218465	2.75908e-11
			Sdc3	-0.263659	2.81759e-11
			Scamp5	-0.274434	2.90588e-11
			Smg6	-0.208666	3.00339e-11
			Ppp1r2	-0.227746	3.00734e-11
			Trim44	-0.232732	3.0168e-11
			Ttyh3	-0.261145	3.0401e-11
			Txlng	-0.328112	3.08816e-11
			Eea1	-0.250098	3.13252e-11
			Ap3s1	-0.265739	3.20122e-11
			Hipk2	-0.211498	3.44786e-11
			Ifnar1	-0.27061	3.50887e-11
			Dguok	-0.243254	3.55339e-11
			Stk38	-0.259775	3.57094e-11
			Pak1	-0.232087	3.70226e-11
			Cox5b	-0.208571	3.92069e-11
			Zzef1	-0.276673	3.93703e-11
			Mapk1ip1l	-0.234123	4.0253e-11
			Snrnp48	-0.270463	4.17239e-11
			Ralgapb	-0.302266	4.19107e-11
			Ctps2	-0.296739	4.23884e-11
			Tlk2	-0.274584	4.5853e-11
			Psmd11	-0.222078	4.77325e-11
			Npc1	-0.24737	4.92327e-11
			Eed	-0.261346	4.9723e-11
			D5Ertd579e	-0.280373	5.1489e-11
			Cd80	-0.296449	5.18278e-11
			Kat6a	-0.201821	5.3215e-11
			Foxk2	-0.294442	5.3304e-11
			Ndufb10	-0.220947	5.49293e-11
			Gtf2f2	-0.297097	5.76345e-11
			Kdm5a	-0.242933	5.79125e-11
			Clptm1	-0.242633	5.80547e-11
			Slc10a7	-0.302294	5.90838e-11
			Trim30d	-0.222008	6.1461e-11
			Malt1	-0.337919	6.36577e-11
			Tmbim4	-0.202642	6.60952e-11
			Pwwp2a	-0.206639	6.6295e-11
			Supt5	-0.260948	6.67979e-11
			Hebp1	-0.230125	6.97131e-11
			Uri1	-0.293308	7.00911e-11
			9930111J21Rik2	-0.226933	7.40015e-11
			Tardbp	-0.257406	7.49579e-11
			Dock11	-0.201876	7.5589e-11
			Trappc9	-0.232592	7.60666e-11
			Ip6k1	-0.253729	7.64826e-11
			Utrn	-0.324048	7.74819e-11
			Hspa14	-0.285565	7.98979e-11
			Mdh2	-0.231634	8.09416e-11
			Eif3b	-0.291449	8.11117e-11
			Ppp1cc	-0.223928	8.17192e-11
			Rhot1	-0.262621	9.36676e-11
			Cln5	-0.290043	9.55502e-11
			Wdr20	-0.276252	9.67552e-11
			Trappc14	-0.268052	1.04412e-10
			Ascc1	-0.298901	1.06803e-10
			Mapk1	-0.210636	1.09602e-10
			Rab11b	-0.219318	1.09602e-10
			Lonp2	-0.260499	1.10117e-10
			Dis3l2	-0.21836	1.10664e-10
			Slc39a1	-0.286369	1.11857e-10
			Spata5	-0.240557	1.15706e-10
			Lrrc58	-0.223753	1.18385e-10
			Ano6	-0.271664	1.20386e-10
			Unc50	-0.239423	1.23807e-10
			Map4k3	-0.229684	1.24524e-10
			Mga	-0.248942	1.24758e-10
			Clec5a	-0.245419	1.24758e-10
			Cct2	-0.218356	1.25628e-10
			Psmd2	-0.271554	1.29002e-10
			Tom1l2	-0.297331	1.37025e-10
			Umad1	-0.299118	1.39214e-10
			Baz1b	-0.236353	1.4367e-10
			Cep170	-0.210671	1.47131e-10
			Rbm17	-0.287271	1.4891e-10
			Ncbp3	-0.289525	1.4891e-10
			Sdha	-0.214559	1.48989e-10
			Creb3	-0.290162	1.55779e-10
			Slc25a36	-0.227204	1.56206e-10
			Phc3	-0.246315	1.59783e-10
			Dpp8	-0.280424	1.67518e-10
			Ube2r2	-0.235207	1.69769e-10
			Bscl2	-0.264235	1.729e-10
			Polr2g	-0.249061	1.75603e-10
			Zfp532	-0.278677	1.7979e-10
			Tgm2	-0.274042	1.83017e-10
			Rbck1	-0.273933	1.83121e-10
			Mcts1	-0.239561	1.85836e-10
			Hypk	-0.279946	1.87018e-10
			Tmem245	-0.252185	1.89266e-10
			Dhrs3	-0.217775	1.90108e-10
			Ppp4r1	-0.245533	1.92732e-10
			Rprd2	-0.282664	1.95331e-10
			Glud1	-0.2238	1.99793e-10
			Klhdc10	-0.282192	2.01214e-10
			Kpna1	-0.26557	2.05662e-10
			Npnt	-0.274526	2.13936e-10
			Phactr2	-0.242647	2.14352e-10
			Traf3ip3	-0.273524	2.15843e-10
			Stk19	-0.286315	2.17521e-10
			Gcn1	-0.273751	2.21056e-10
			Hyi	-0.286406	2.21169e-10
			Kdm1a	-0.252709	2.29442e-10
			Psmc1	-0.279135	2.34608e-10
			Ppt2	-0.273985	2.38348e-10
			Tm2d2	-0.244955	2.4416e-10
			Cox7b	-0.213338	2.55738e-10
			Stt3a	-0.251746	2.56843e-10
			Cox5a	-0.209784	2.66576e-10
			Dync1li1	-0.245946	2.77817e-10
			Tcp1	-0.232859	2.85296e-10
			Scand1	-0.200624	2.87162e-10
			Ppp1r9b	-0.260506	2.87505e-10
			Rnf220	-0.293387	2.87548e-10
			Smurf1	-0.274349	2.93952e-10
			Pdxdc1	-0.25335	2.94114e-10
			Birc2	-0.273779	2.96422e-10
			Plagl2	-0.277248	3.06199e-10
			Gps2	-0.227767	3.25374e-10
			Stim1	-0.259698	3.27194e-10
			Ndufb2	-0.273197	3.39923e-10
			Rnf4	-0.274717	3.4227e-10
			Dnajc15	-0.288066	3.53999e-10
			Ehbp1l1	-0.285975	3.57562e-10
			Rogdi	-0.248744	3.60653e-10
			Prkd3	-0.242086	3.63086e-10
			Parp1	-0.281375	3.72254e-10
			Pald1	-0.235747	4.00193e-10
			Ubap1	-0.260277	4.16705e-10
			Atxn2	-0.204067	4.18227e-10
			Mif4gd	-0.281778	4.19034e-10
			Frg1	-0.250947	4.24155e-10
			Fis1	-0.200651	4.38081e-10
			Chd8	-0.236978	4.6224e-10
			Jak2	-0.27834	4.77555e-10
			B4galt6	-0.272566	4.78344e-10
			Srd5a3	-0.279752	4.82033e-10
			Tomm22	-0.219247	4.85916e-10
			Ppp1r12b	-0.286244	4.92157e-10
			Tk2	-0.269419	4.98571e-10
			Gpsm3	-0.205256	5.04274e-10
			Il4ra	-0.255213	5.07775e-10
			Dnajc24	-0.300339	5.14686e-10
			Nrd1	-0.207371	5.4983e-10
			Spast	-0.27765	5.51943e-10
			Insr	-0.247829	5.6635e-10
			Nfat5	-0.209221	5.70411e-10
			Mrpl51	-0.273985	5.74016e-10
			Crtc3	-0.299393	5.74275e-10
			Snrpf	-0.223887	6.03541e-10
			Acadl	-0.250703	6.05658e-10
			Ston2	-0.254819	6.26261e-10
			Wbp2	-0.212522	6.28874e-10
			Dnajc3	-0.205862	6.29057e-10
			Abcb7	-0.293017	6.3199e-10
			Snrnp27	-0.253657	6.78545e-10
			Slirp	-0.263674	6.83903e-10
			Arid2	-0.233499	7.10728e-10
			Commd1	-0.270806	7.21292e-10
			Rnf115	-0.206465	7.21914e-10
			Eif3g	-0.249938	7.23353e-10
			Rbm22	-0.277919	7.53955e-10
			Adar	-0.258307	7.68586e-10
			Eno1	-0.234869	8.01382e-10
			Irag2	-0.283002	8.65299e-10
			Cmtm3	-0.262369	8.67742e-10
			Cabin1	-0.269393	8.84917e-10
			Nbr1	-0.272906	9.04192e-10
			Zswim4	-0.262582	9.25399e-10
			Ugp2	-0.270833	9.28713e-10
			Tmem147	-0.253828	9.9273e-10
			Naa38	-0.262789	1.0204e-09
			Naga	-0.250802	1.03764e-09
			Mrps28	-0.274592	1.05913e-09
			Otulin	-0.216114	1.07567e-09
			Klhl24	-0.231353	1.07993e-09
			Dpm3	-0.243049	1.09257e-09
			Sars	-0.244758	1.10815e-09
			Psmd1	-0.225052	1.12043e-09
			Rbm28	-0.258087	1.13122e-09
			Zfyve1	-0.283702	1.13981e-09
			Cct5	-0.225906	1.25543e-09
			Rabl6	-0.235159	1.30026e-09
			Pex13	-0.259199	1.31366e-09
			Gpatch2l	-0.229608	1.35628e-09
			Nr4a3	-0.35635	1.36898e-09
			Cryba4	-0.236345	1.36898e-09
			Yipf4	-0.221599	1.3761e-09
			Zfx	-0.202624	1.4238e-09
			Med28	-0.223774	1.4676e-09
			Cct8	-0.221369	1.46761e-09
			Rbm33	-0.253225	1.51243e-09
			Chd6	-0.222248	1.52318e-09
			Nudt3	-0.259842	1.52655e-09
			Pbx3	-0.268135	1.55436e-09
			Sf3b3	-0.252392	1.59557e-09
			Cct3	-0.235113	1.59579e-09
			Ccl2	-0.385544	1.60482e-09
			Fip1l1	-0.237515	1.63063e-09
			Chrac1	-0.249779	1.64032e-09
			Cdkn1a	-0.343236	1.641e-09
			Ciao2a	-0.242793	1.64692e-09
			Dennd2b	-0.254813	1.65457e-09
			Slmap	-0.201361	1.65457e-09
			Supt4a	-0.212218	1.71204e-09
			Rai1	-0.29415	1.74588e-09
			Stx4a	-0.244911	1.74804e-09
			Ubqln1	-0.252478	1.76344e-09
			Oma1	-0.244366	1.78813e-09
			Phlpp1	-0.288278	1.79732e-09
			Kif3b	-0.281167	1.79732e-09
			Vwa5a	-0.222258	1.81385e-09
			Ccdc93	-0.21122	1.82759e-09
			Idh3b	-0.263882	1.87805e-09
			Asb3	-0.29271	1.90096e-09
			Vps29	-0.211996	2.03898e-09
			Bmt2	-0.237329	2.05061e-09
			Efcab14	-0.237012	2.10919e-09
			Pnpla8	-0.227735	2.15489e-09
			Lrrc59	-0.269032	2.20186e-09
			Taf3	-0.249297	2.20246e-09
			Usp32	-0.215334	2.23518e-09
			Txndc15	-0.22885	2.24636e-09
			Arhgef6	-0.225571	2.27586e-09
			Nck1	-0.245793	2.36338e-09
			Itprid2	-0.212565	2.42344e-09
			Tango2	-0.250081	2.55945e-09
			Dmxl1	-0.206624	2.57497e-09
			Ppm1g	-0.233676	2.62396e-09
			Psmc6	-0.214848	2.64793e-09
			Rexo2	-0.244637	2.66193e-09
			Por	-0.266482	2.66951e-09
			Sec31a	-0.237913	2.69992e-09
			Nsrp1	-0.249329	2.72231e-09
			Ankib1	-0.261204	2.72231e-09
			Stam2	-0.280055	2.76609e-09
			R3hdm4	-0.256402	2.85501e-09
			Fam13b	-0.200479	2.88011e-09
			Cnot10	-0.269197	2.89472e-09
			Plk3	-0.225667	3.02297e-09
			Kif21b	-0.204849	3.04212e-09
			Gnl2	-0.250929	3.04389e-09
			Abhd17a	-0.238969	3.07964e-09
			Paf1	-0.284656	3.08831e-09
			Stat5b	-0.244689	3.11914e-09
			Nfyc	-0.273192	3.15238e-09
			Rilpl1	-0.219131	3.16319e-09
			Zmat5	-0.261911	3.19913e-09
			St6galnac4	-0.208881	3.24579e-09
			Polr2a	-0.216112	3.35387e-09
			Opa1	-0.264044	3.40379e-09
			Ptpn2	-0.231527	3.40784e-09
			Cdc123	-0.259992	3.4962e-09
			Pik3r6	-0.273601	3.5712e-09
			Ufsp2	-0.238734	3.59817e-09
			Tfeb	-0.238213	3.6596e-09
			Rmnd5a	-0.264421	3.69729e-09
			Prdx3	-0.260219	3.69729e-09
			Rsu1	-0.204178	3.76317e-09
			Rnf157	-0.280908	3.89729e-09
			Esd	-0.218372	3.92327e-09
			Lrrc25	-0.236689	3.95955e-09
			Aprt	-0.247784	3.99101e-09
			Atp5g3	-0.229652	4.01297e-09
			Mysm1	-0.223384	4.04723e-09
			Dglucy	-0.261579	4.05544e-09
			Gpbp1l1	-0.223895	4.1311e-09
			Suclg1	-0.246415	4.16241e-09
			Stx5a	-0.218349	4.19987e-09
[truncated: 405 more rows]
