# Supplementary figures and images for: Inhibition of astrocyte signaling leads to sex-specific changes in microglia phenotypes in a diet-based model of small cerebral vessel disease
Source: Research Square preprint supplement (doi:10.21203/rs.3.rs-6198453/v1), 2025-03-17

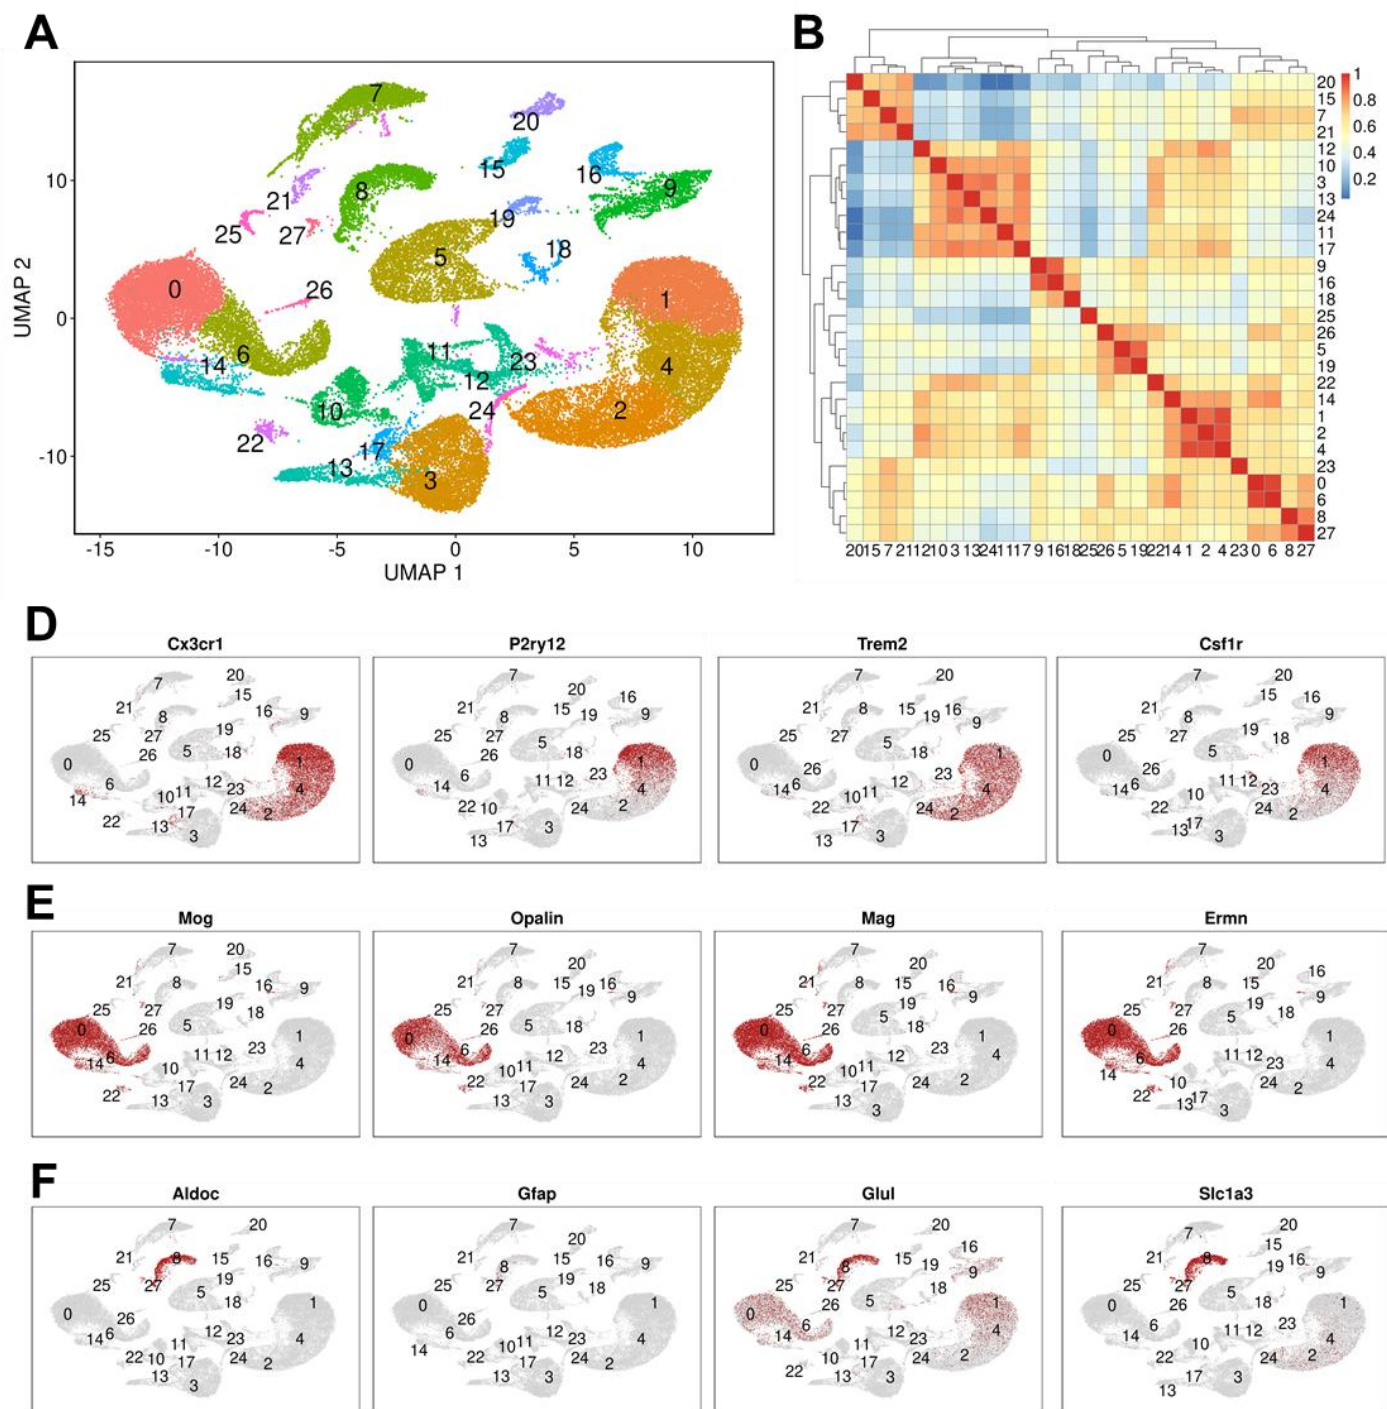

Gollihue et al Supplementary Figure 1

Supplement: Supplementary file 1 [file 1326fcab7c0944765dc5ab74.pdf]
